# Supplementary material
Source: publisher figshare collection journal article supplement (https://acs.figshare.com/ndownloader/files/21923085)
Supplement: Supplementary file 1 [file 21923085]

## *Supporting Information*

### **Visible Light-Mediated $\beta$ -C-H *gem*-Difluoroallylation of Aldehydes and Cyclic Ketones through C-F Bond Cleavage of 1-Trifluoromethyl Alkenes**

Devireddy Anand, Zhengchang Sun, Lei Zhou\*

*School of Chemistry, Sun Yat-Sen University, 135 Xingang West Road, Guangzhou 510275, China*

*E-mail: [zhoul39@mail.sysu.edu.cn](mailto:zhoul39@mail.sysu.edu.cn)*

#### ***Table of Content***

|                                                                                                                     |     |
|---------------------------------------------------------------------------------------------------------------------|-----|
| <i>General</i> .....                                                                                                | S2  |
| <i>General procedure for the <math>\beta</math>-gem-difluoroallylation of aldehyde</i> .....                        | S2  |
| <i>Synthetic procedure for the compound <b>3f</b> at 1 mmol scale</i> .....                                         | S3  |
| <i>General procedure for the <math>\beta</math>-gem-difluoroallylation of cyclic ketone</i> .....                   | S3  |
| <i>Synthetic procedure for the compound <b>5a</b> at 1 mmol scale</i> .....                                         | S4  |
| <i>Experimental setup for the photocatalytic reactions</i> .....                                                    | S5  |
| <i>Optimization for the <math>\beta</math>-gem-difluoroallylation of cyclopentanone</i> .....                       | S6  |
| <i>Synthetic applications of the products</i> .....                                                                 | S7  |
| <i>Compounds characterization data</i> .....                                                                        | S9  |
| <i>Reference</i> .....                                                                                              | S21 |
| <i><math>^1\text{H}</math> NMR, <math>^{13}\text{C}</math> NMR and <math>^{19}\text{F}</math> NMR spectra</i> ..... | S22 |

## General

Unless otherwise noted, all reactions were performed in a 10 mL test tube at room temperature. Photo-irradiation was carried out with a 5 W blue LED. For chromatography, 200-300 mesh silica gel (Qingdao, China) was employed.  $^1\text{H}$  NMR and  $^{13}\text{C}$  NMR spectra were measured in  $\text{CDCl}_3$  and recorded on Bruker ARX 400 spectrometer. Chemical shifts ( $\delta$ ) were given in ppm, referenced to the residual proton resonance of  $\text{CDCl}_3$  (7.26), to the carbon resonance of  $\text{CDCl}_3$  (77.16). Coupling constants ( $J$ ) were given in Hertz (Hz). The term m, t, d, s, dd referred to multiplet, triplet, doublet, singlet, doublet of doublet. High resolution mass spectra (HRMS) were obtained using orbitrap as the mass analyzer with an ESI source.  $\alpha$ - $\text{CF}_3$  alkenes were prepared according to literature reported procedures.<sup>1,2</sup> All reagents and solvents were commercial available and directly used without any further purification.

### General procedure for the $\beta$ -gem-difluoroallylation of aldehydes

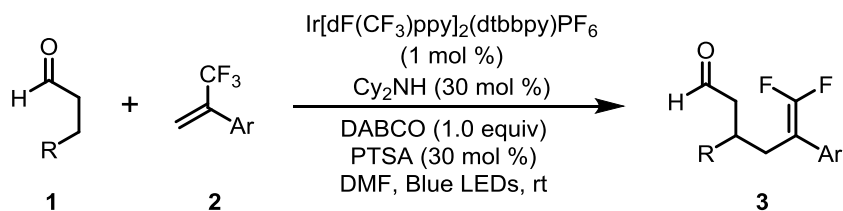

To a dry 10 mL vial equipped with a stir bar was added  $\alpha$ - $\text{CF}_3$  alkene **2** (0.2 mmol), DABCO (22.4 mg, 0.2 mmol),  $\text{Ir}[\text{dF}(\text{CF}_3)\text{ppy}]_2(\text{dtbbpy})\text{PF}_6$  (2.2 mg, 1 mol %) and *p*-toluenesulfonic acid (10.3 mg, 30 mol %). The vial was sealed, degassed *via* vacuum evacuation for 5 minutes and backfilled with argon. Dicyclohexylamine (10.9 mg, 30 mol %), aldehyde **1** (0.4 mmol, 2.0 equiv), and DMF (2 mL) were added to the reaction vial. The reaction vial was irradiated with a 5 W blue LED light at room temperature for 24 hours. After consumption of the starting material, 10 mL water was added and the mixture was extracted with ethyl acetate, washed with brine and dried with anhydrous  $\text{Na}_2\text{SO}_4$ . Purification by silica column chromatography afforded the desired  $\beta$ -gem-difluoroallylation product (**3**).

### Synthetic procedure for the compound **3f** at 1 mmol scale

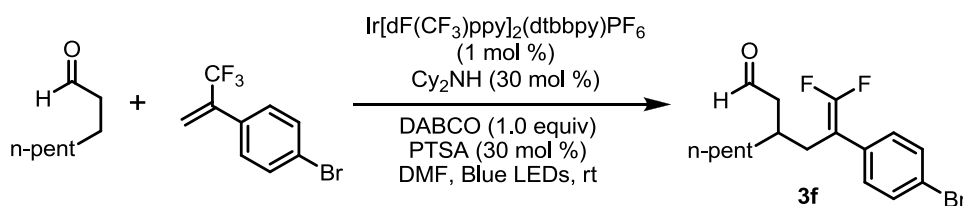

To a dry 50 mL vial equipped with a stir bar was added  $\alpha$ -CF<sub>3</sub> (4-bromo)styrene (251 mg, 1 mmol), DABCO (112 mg, 1 mmol), Ir[dF(CF<sub>3</sub>)ppy]<sub>2</sub>(dtbbpy)PF<sub>6</sub> (11.2 mg, 1 mol %) and *p*-toluenesulfonic acid (51.6 mg, 30 mol %). The vial was sealed, degassed *via* vacuum evacuation for 5 minutes and backfilled with argon. Dicyclohexylamine (54.3 mg, 30 mol %), octanal **1a** (256 mg, 2 mmol), and DMF (10 mL) were added to the reaction vial. The reaction vial was irradiated with a 5 W blue LED light at room temperature for 24 hours. After consumption of the starting material, 30 mL water was added and the mixture was extracted with ethyl acetate, washed with brine and dried with anhydrous Na<sub>2</sub>SO<sub>4</sub>. Purification by silica column chromatography using petroleum ether/ethyl acetate (50:1) as the eluent afforded the desired  $\beta$ -gem-difluoroallylation product **3f** (247.7 mg) in 69 % yield.

### General procedure for the $\beta$ -gem-difluoroallylation of cyclic ketones

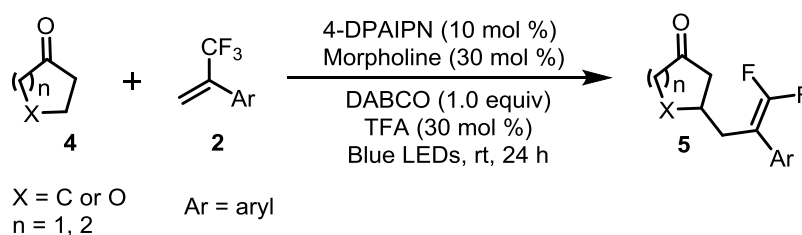

To a dry 10 mL vial equipped with a stir bar was added  $\alpha$ -CF<sub>3</sub> alkene **2** (0.2 mmol), DABCO (22.4 mg, 0.2 mmol), and 4-DPAIPN (16 mg, 10 mol %). The vial was sealed, degassed *via* vacuum evacuation for 5 minutes and backfilled with argon. Morpholine (5.2 mg, 30 mol %), cyclic ketone **4** (1.0 mmol, 5.0 equiv), trifluoroacetic acid (6.9 mg, 30 mol %), and DMF (2 mL) were added to the reaction vial. The reaction vial was irradiated with a 5 W blue LED light at room temperature for 24 hours. After consumption of the starting material, 10 mL water was added and the

mixture was extracted with ethyl acetate, washed with brine and dried with anhydrous  $\text{Na}_2\text{SO}_4$ . Purification by silica column chromatography afforded the desired  $\beta$ -gem-difluoroallylation product (**5**).

***Synthetic procedure for the compound 5a at 1 mmol scale***

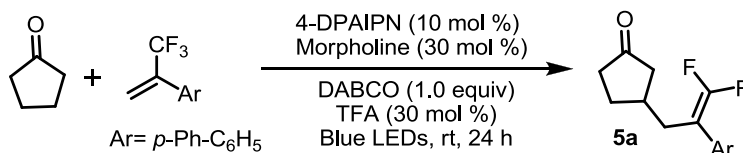

To a dry 50 mL vial equipped with a stir bar was added  $\alpha$ -CF<sub>3</sub> (4-phenyl)styrene **2a** (248 mg, 1 mmol), DABCO (112 mg, 1 mmol), and 4-DPAIPN (79.7 mg, 10 mol %). The vial was sealed, degassed *via* vacuum evacuation for 5 minutes and backfilled with argon. Morpholine (26 mg, 30 mol %), cyclopentanone **4** (420 mg, 5.0 mmol), trifluoroacetic acid (34.2 mg, 30 mol %), and DMF (10 mL) were added to the reaction vial. The reaction vial was irradiated with a 5 W blue LED light at room temperature for 24 hours. After consumption of the starting material, 30 mL water was added and the mixture was extracted with ethyl acetate, washed with brine and dried with anhydrous  $\text{Na}_2\text{SO}_4$ . Purification by silica column chromatography using petroleum ether/ethyl acetate (40:1) as the eluent afforded the desired  $\beta$ -gem-difluoroallylation product **5a** (206 mg) in 66% yield.

### *Experimental setup for the photocatalytic reactions*

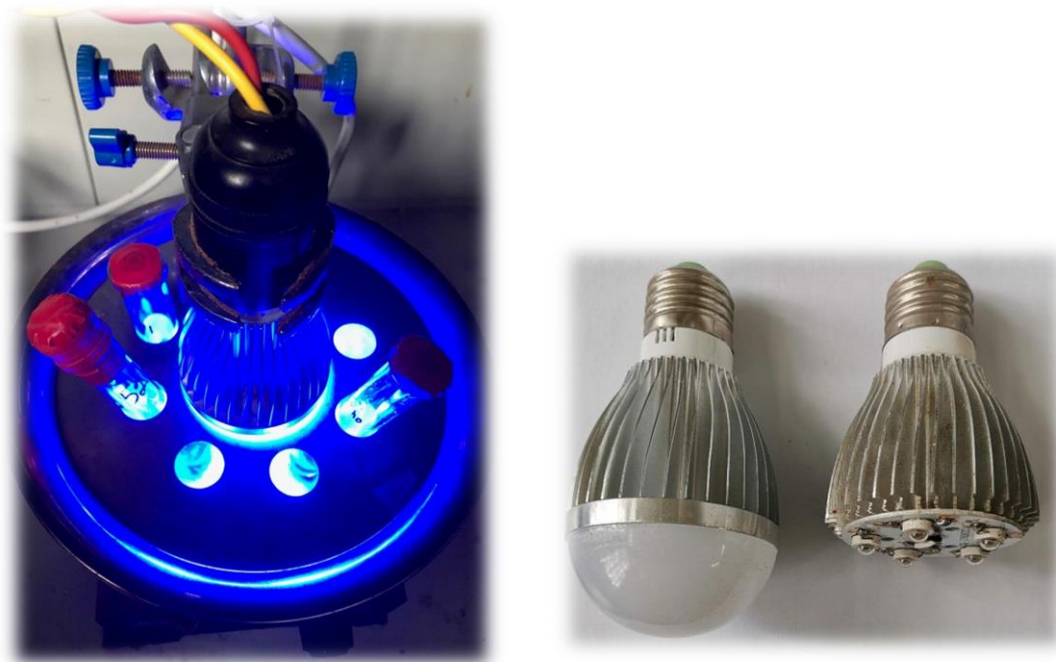

The reaction was carried out in a 10 mL Teflon-sealed microwave tube (biotage), approximately 5 cm from the light source. The blue LED was purchased from QJL, and its link is: <https://item.taobao.com/item.htm?spm=a230r.1.14.20.4bfb368frEfkJn&id=558978956686&ns=1&abbucket=17#detail>. The cover was removed before use and its emission spectrum is shown in Figure S1.

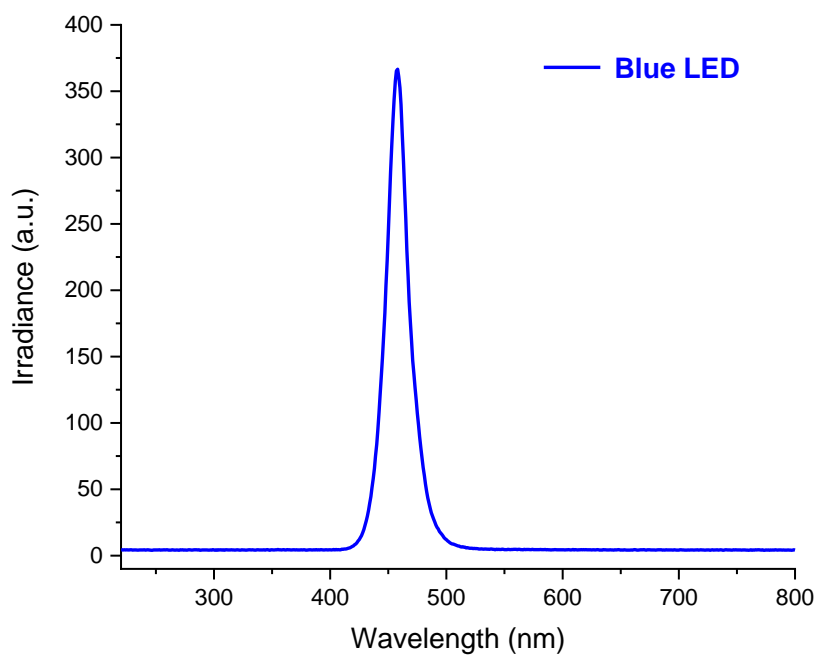

**Figure S1** The emission spectra of blue LED.

**Table S1. Optimization for the  $\beta$ -gem-difluoroallylation of cyclopentanone**

Reaction scheme: Cyclopentanone (**4a**) + 2a  $\xrightarrow[\text{DMF, Blue LEDs, rt, 24 h}]{\text{Photocatalyst (10 mol\%), Organocatalyst (30 mol\%), DABCO (1.0 equiv), Acid catalyst (30 mol\%)}}$  Product **5a**

| entry           | photocatalyst                        | organocatalyst     | acid catalyst | yield (%) <sup>b</sup> |
|-----------------|--------------------------------------|--------------------|---------------|------------------------|
| 1 <sup>c</sup>  | Ir-2                                 | Cy <sub>2</sub> NH | PTSA          | 30                     |
| 2 <sup>c</sup>  | Ir-2                                 | Cy <sub>2</sub> NH | TFA           | 42                     |
| 3 <sup>c</sup>  | Ir-2                                 | morpholine         | TFA           | 63                     |
| 4 <sup>c</sup>  | Ir-1                                 | morpholine         | TFA           | 50                     |
| 5               | 4DPAIPN                              | morpholine         | TFA           | 77                     |
| 6               | 4-CzIPN                              | morpholine         | TFA           | 65                     |
| 7               | Eosin Y                              | morpholine         | TFA           | 10                     |
| 8               | Rose bengal                          | morpholine         | TFA           | 5                      |
| 9               | MesAcrClO <sub>4</sub>               | morpholine         | TFA           | trace                  |
| 10 <sup>c</sup> | Ru(bpy) <sub>3</sub> Cl <sub>2</sub> | morpholine         | TFA           | 21                     |
| 11              | 4DPAIPN                              | pyrrodine          | TFA           | 68                     |
| 12              | 4DPAIPN                              | piperidine         | TFA           | 65                     |
| 13              | 4DPAIPN                              | azapane            | TFA           | 70                     |
| 14 <sup>d</sup> | 4-DPAIPN                             | morpholine         | TFA           | 0                      |

<sup>a</sup> Reaction conditions: **4a** (1.0 mmol), **2a** (0.2 mmol), photocatalyst (10 mol%), organocatalyst (30 mol%), DABCO (0.2 mmol), acid catalyst (30 mol%), DMF (2 mL), 5W blue LED, rt, 24 h. <sup>b</sup> Yield was determined by <sup>19</sup>F NMR using benzotrifluoride as an internal standard. <sup>c</sup> 1 mol% of photocatalyst loading. <sup>d</sup> Reaction carried out in the absence of DABCO. DABCO: 1,4-diazabicyclo[2.2.2]octane. PTSA: *p*-toluenesulfonic acid. TFA: trifluoroacetic acid.

## Synthetic applications of the products

### 1. Oxidation of aldehyde to carboxylic acid

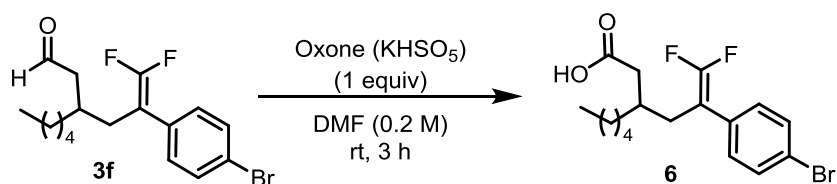

The aldehyde **3f** (71.8 mg, 0.2 mmol) was dissolved in DMF (1 mL). Oxone (122.8 mg, 0.2 mmol) was added in one portion and stirred at room temperature for 3 hours. The reaction was monitored by TLC. After consumption of the starting material, reaction mixture was diluted with 1N HCl, extracted with EtOAc, washed with brine and dried over Na<sub>2</sub>SO<sub>4</sub>. Purification by silica column chromatography using petroleum ether/ethyl acetate (5:1) as the eluent afforded the desired carboxylic acid product **6** (57 mg) in 76% yield.

### 2. Oxidation of aldehyde to ester

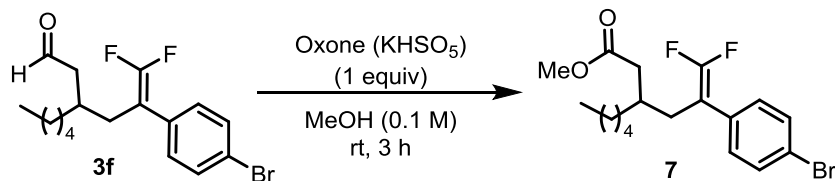

The aldehyde **3f** (71.8 mg, 0.2 mmol) was dissolved in MeOH (2 mL). Oxone (122.8 mg, 0.2 mmol) was added in one portion and stirred at room temperature for 24 hours. After the completion of the reaction, as monitored by TLC, reaction mixture was diluted with 1N HCl, extracted with EtOAc, washed with brine and dried over Na<sub>2</sub>SO<sub>4</sub>. Purification by silica column chromatography using petroleum ether/ethyl acetate (40:1) as the eluent afforded the desired carboxylic acid product **7** (54 mg) in 70% yield.

### 3. Reduction of cyclic ketone with NaBH<sub>4</sub>

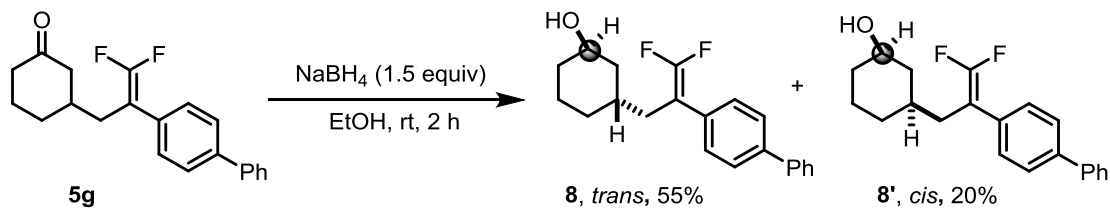

The ketone **5g** (100 mg, 0.3 mmol) was dissolved in EtOH (2 mL). NaBH<sub>4</sub> (17.1 mg, 0.45 mmol) was added in one portion and stirred at room temperature for 2 hours. After the completion of the reaction, as monitored by TLC, solvent was evaporated and diluted with water, extracted with EtOAc, washed with brine and dried over Na<sub>2</sub>SO<sub>4</sub>. Purification by silica column chromatography using petroleum ether/ethyl acetate (10:1) as the eluent afforded the two separable diastereomers **8** and **8'** in yields of 55% (54 mg) and 25% (19.7 mg), respectively.

#### 4. Nucleophilic addition of terminal alkyne to cyclic ketone

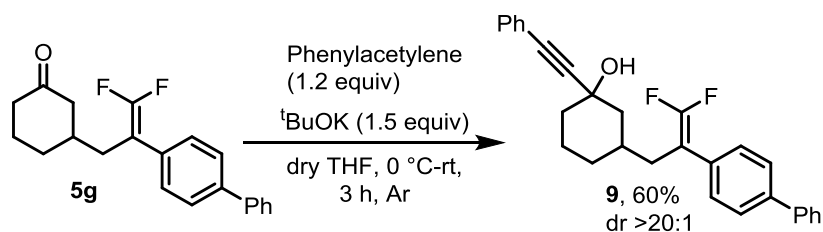

To a solution of <sup>t</sup>BuOK (33.6 mg, 0.3 mmol) in dry THF was added phenylacetylene (24.5 mg, 0.24 mmol) at 0 °C under argon atmosphere. After the mixture was stirred at room temperature for 5 minutes, ketone **5g** (65.2 mg, 0.2 mmol) was added drop wise. The reaction mixture was stirred for 3 hours. After completion of the reaction, the resulting mixture was quenched with water and extracted with EtOAc. The combined organic layers were dried over Na<sub>2</sub>SO<sub>4</sub> and concentrated in *vacuum*. The residue was purified by column chromatography using petroleum ether/ethyl acetate (10:1) as the eluent to give the product **9** with >20:1 diastereoselectivity (51.3 mg, 60%).

#### 5. Intramolecular S<sub>N</sub>V reaction for the synthesis of fluorooxetine



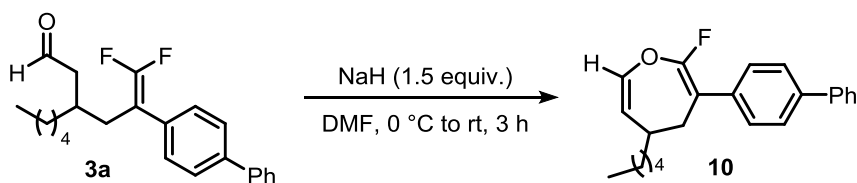

To a solution of  $\beta$ -gem-difluoroallyl aldehyde **3a** (71.2 mg, 0.2 mmol.) in dry DMF (2 mL), NaH (12 mg, 0.3 mmol, 60% dispersion in mineral oil) was added at 0 °C. Then the reaction mixture was stirred for 3 hours at room temperature. The reaction was quenched with water and extracted with EtOAc (10 mL x 3), dried with anhydrous Na<sub>2</sub>SO<sub>4</sub> and concentrated in *vacuo*. Purification by silica column chromatography using petroleum ether as the only eluent afforded the desired fluorodihydrooxepine product **10** (30 mg) in 44% yield.

### Compound characterization data

#### 3-(2-(biphenyl-4-yl)-3,3-difluoroallyl)octanal (**3a**):

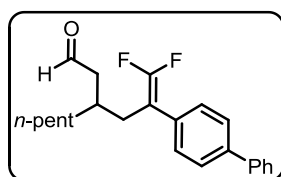

R<sub>f</sub>: 0.6 (petroleum ether/ethyl acetate 20:1). Colorless oil (54 mg, 76% yield). <sup>1</sup>H NMR (400 MHz, CDCl<sub>3</sub>) δ 9.68 (t, *J* = 2.0 Hz, 1H), 7.60 (d, *J* = 8.1 Hz, 4H), 7.45 (t, *J* = 7.6 Hz, 2H), 7.40-7.34 (m, 3H), 2.55-2.35 (m, 4H), 2.08-1.99 (m, 1H), 1.37-1.17 (m, 8H), 0.86 (t, *J* = 7.0 Hz, 3H); <sup>13</sup>C NMR (101 MHz, CDCl<sub>3</sub>) δ 202.4, 154.2 (dd, *J* = 290.7, 288.3 Hz), 140.5, 140.4, 132.2, 128.9, 128.7 (t, *J* = 3.0 Hz), 127.5, 127.3, 127.1, 90.7 (dd, *J* = 19.6, 15.0 Hz), 48.0, 33.8, 32.1, 32.0, 31.5 (t, *J* = 2.0 Hz), 26.2, 22.6, 14.1; <sup>19</sup>F NMR (376 MHz, CDCl<sub>3</sub>) δ -89.91 (d, *J* = 41.0 Hz, 1F), -90.04 (d, *J* = 41.0 Hz, 1F); HRMS (ESI) *m/z*: [M+H]<sup>+</sup> Calcd for C<sub>23</sub>H<sub>27</sub>F<sub>2</sub>O 357.2030; Found 357.2027.

#### 3-(3,3-difluoro-2-phenylallyl)octanal (**3b**):

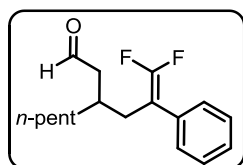

R<sub>f</sub>: 0.6 (petroleum ether/ethyl acetate 20:1). Colorless oil (35 mg, 62% yield). <sup>1</sup>H NMR (400 MHz, CDCl<sub>3</sub>) δ 9.64 (s, 1H), δ 7.39-7.35 (m, 2H), 7.31-7.26 (m, 3H), 2.51-2.32 (m, 4H), 2.0-1.94 (m, 1H), 1.34-1.20 (m, 8H), 0.85 (t, *J* = 7.0 Hz, 3H); <sup>13</sup>C NMR

(101 MHz, CDCl<sub>3</sub>)  $\delta$  202.5, 154.1 (t,  $J$  = 289 Hz), 133.3, 128.7, 128.3 (t,  $J$  = 2.9 Hz), 127.6, 91.0 (t,  $J$  = 17.4 Hz), 48.0, 33.8, 32.2, 31.9, 31.4 (t,  $J$  = 2.2 Hz), 26.1, 22.6, 14.1; **<sup>19</sup>F NMR** (376 MHz, CDCl<sub>3</sub>)  $\delta$  -90.61 (s, 2F) **HRMS (ESI)** m/z: [M+H]<sup>+</sup> Calcd for C<sub>17</sub>H<sub>23</sub>F<sub>2</sub>O 281.1717; Found 281.1715.

### 3-(3,3-difluoro-2-*p*-tolylallyl)octanal (3c):

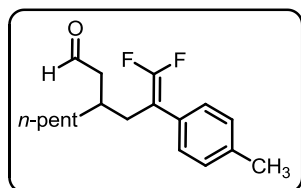

R<sub>f</sub>: 0.61 (petroleum ether/ethyl acetate 20:1). Colorless oil (40 mg, 68% yield). **<sup>1</sup>H NMR** (400 MHz, CDCl<sub>3</sub>)  $\delta$  9.64 (s, 1H), 7.18 (s, 4H), 2.49-2.44 (m, 1H), 2.38-2.31 (m, 6H), 1.99-1.94 (m, 1H), 1.33-1.20 (m, 8H), 0.86 (t,  $J$  = 6.8 Hz, 3H); **<sup>13</sup>C NMR** (101 MHz, CDCl<sub>3</sub>)  $\delta$  202.6, 154.1 (dd,  $J$  = 290.0, 287.2 Hz), 137.4, 130.2, 129.4, 128.2 (t,  $J$  = 3.0 Hz), 90.7 (dd,  $J$  = 19.9, 14.8 Hz), 48.0, 33.9, 32.3, 32.0, 31.4 (t,  $J$  = 2.4 Hz), 26.2, 22.6, 21.2, 14.1; **<sup>19</sup>F NMR** (376 MHz, CDCl<sub>3</sub>)  $\delta$  -90.95 (d,  $J$  = 43.1 Hz, 1F), -91.10 (d,  $J$  = 43.1 Hz, 1F); **HRMS (ESI)** m/z: [M+H]<sup>+</sup> Calcd for C<sub>18</sub>H<sub>25</sub>F<sub>2</sub>O 295.1873; Found 295.1869.

### 3-(2-(4-*tert*-butylphenyl)-3,3-difluoroallyl)octanal (3d):

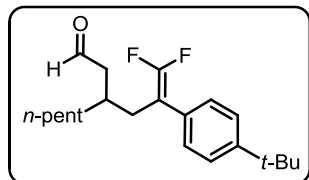

R<sub>f</sub>: 0.7 (petroleum ether/ethyl acetate 20:1). Colorless oil (44 mg, 65% yield). **<sup>1</sup>H NMR** (400 MHz, CDCl<sub>3</sub>)  $\delta$  9.65 (s, 1H), 7.37 (d,  $J$  = 8.0 Hz, 2H), 7.23 (d,  $J$  = 8.0 Hz, 2H), 2.50-2.32 (m, 4H), 2.02-1.99 (m, 1H), 1.32 (s, 9H), 1.27-1.20 (m, 8H), 0.85 (t,  $J$  = 6.8 Hz, 3H); **<sup>13</sup>C NMR** (101 MHz, CDCl<sub>3</sub>)  $\delta$  202.7, 154.2 (t,  $J$  = 288.8 Hz), 150.5, 130.2, 127.9 (t,  $J$  = 3.0 Hz), 125.6, 90.7 (t,  $J$  = 17.2 Hz), 48.0, 34.6, 33.8, 32.1, 32.0, 31.5 (t,  $J$  = 2.4 Hz), 26.1, 22.6, 14.1; **<sup>19</sup>F NMR** (376 MHz, CDCl<sub>3</sub>)  $\delta$  -90.72 (s, 2F); **HRMS (ESI)** m/z: [M+H]<sup>+</sup> Calcd for C<sub>21</sub>H<sub>31</sub>F<sub>2</sub>O 337.2343; Found 337.2339.

### 3-(3,3-difluoro-2-(4-methoxyphenyl)allyl)octanal (3e):

R<sub>f</sub>: 0.62 (petroleum ether/ethyl acetate 20:1). Colorless oil (44 mg, 71% yield). **<sup>1</sup>H NMR** (400 MHz, CDCl<sub>3</sub>)  $\delta$  9.64 (s, 1H), 7.22 (d,  $J$  = 8.1 Hz, 2H), 6.90 (d,  $J$  = 8.0 Hz,

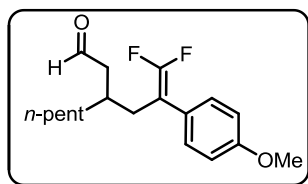

2H), 3.82 (s, 3H), 2.47-2.31 (m, 4H), 2.00-1.94 (m, 1H), 1.33-1.21 (m, 8H), 0.86 (t,  $J = 6.9$  Hz, 3H);  $^{13}\text{C}$  NMR (101 MHz,  $\text{CDCl}_3$ )  $\delta$  202.6, 156.5 (t,  $J = 288.0$  Hz), 129.4 (t,  $J = 3.1$  Hz), 125.3, 114.1, 90.4 (dd,  $J = 19.5, 15.4$  Hz), 55.4, 48.0, 33.8, 32.3, 32.0, 31.4 (t,  $J = 2.1$  Hz), 26.2, 22.6, 14.1;  $^{19}\text{F}$  NMR (376 MHz,  $\text{CDCl}_3$ )  $\delta$  -91.46 (d,  $J = 44.5$  Hz, 1F), -91.59 (d,  $J = 44.4$  Hz, 1F); HRMS (ESI)  $m/z$ :  $[\text{M}+\text{H}]^+$  Calcd for  $\text{C}_{18}\text{H}_{25}\text{F}_2\text{O}_2$  311.1823; Found 311.1822.

### 3-(2-(4-bromophenyl)-3,3-difluoroallyl)octanal (3f):

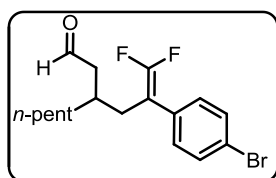

$R_f$ : 0.64 (petroleum ether/ethyl acetate 20:1). Colorless oil (55 mg, 77% yield).  $^1\text{H}$  NMR (400 MHz,  $\text{CDCl}_3$ )  $\delta$  9.66 (s, 1H), 7.50 (d,  $J = 8.1$  Hz, 2H), 7.18 (d,  $J = 8.0$  Hz, 2H), 2.46-2.33 (m, 4H), 1.96-1.91 (m, 1H), 1.32-1.20 (m, 8H), 0.85 (t,  $J = 6.9$  Hz, 3H);  $^{13}\text{C}$  NMR (101 MHz,  $\text{CDCl}_3$ )  $\delta$  202.1, 154.1 (dd,  $J = 291.3, 288.4$  Hz), 132.2 (t,  $J = 3.0$  Hz), 131.9, 130.0 (t,  $J = 3.1$  Hz), 121.6, 90.3 (dd,  $J = 20.7, 14.6$  Hz), 48.0, 33.7, 32.1, 32.0, 31.3 (t,  $J = 2.4$  Hz), 26.1, 22.6, 14.1;  $^{19}\text{F}$  NMR (376 MHz,  $\text{CDCl}_3$ )  $\delta$  -89.53 (d,  $J = 40.0$  Hz, 1F), -89.67 (d,  $J = 39.9$  Hz, 1F); HRMS (ESI)  $m/z$ :  $[\text{M}+\text{H}]^+$  Calcd for  $\text{C}_{17}\text{H}_{22}\text{BrF}_2\text{O}$  359.0822; Found 359.0820.

### 3-(3,3-difluoro-2-*m*-tolylallyl)octanal (3g):

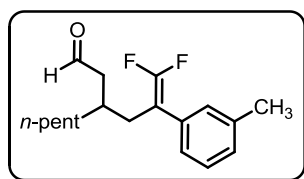

$R_f$ : 0.61 (petroleum ether/ethyl acetate 20:1). Colorless oil (39 mg, 66% yield).  $^1\text{H}$  NMR (400 MHz,  $\text{CDCl}_3$ )  $\delta$  9.67 (s, 1H), 7.30-7.26 (m, 1H), 7.13-7.11 (m, 3H), 2.53-2.49 (m, 1H), 2.42-2.34 (m, 6H), 2.02-1.97 (m, 1H), 1.36-1.23 (m, 8H), 0.88 (t,  $J = 6.9$  Hz, 3H);  $^{13}\text{C}$  NMR (101 MHz,  $\text{CDCl}_3$ )  $\delta$  202.6, 154.1 (dd,  $J = 290.9, 286.8$  Hz), 138.3, 133.2 (t,  $J = 3.0$  Hz), 129.0 (t,  $J = 2.9$  Hz), 128.5, 128.4, 125.4 (t,  $J = 2.9$  Hz), 91.0 (dd,  $J = 20.8, 14.0$  Hz), 48.0, 33.8, 32.3, 32.0, 31.4 (t,  $J = 2.3$  Hz), 26.1, 22.6, 21.6, 14.1;  $^{19}\text{F}$  NMR (376 MHz,  $\text{CDCl}_3$ )  $\delta$  -90.60 (d,  $J = 42.3$  Hz, 1F), -90.83 (d,  $J = 42.4$  Hz, 1F); HRMS (ESI)  $m/z$ :  $[\text{M}+\text{H}]^+$  Calcd for  $\text{C}_{18}\text{H}_{25}\text{F}_2\text{O}$  295.1873; Found 295.1870.

### 3-(2-(3,4-dimethylphenyl)-3,3-difluoroallyl)octanal (3h):

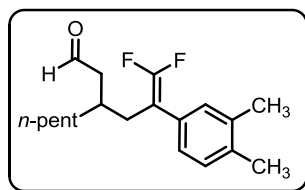

R<sub>f</sub>: 0.61 (petroleum ether/ethyl acetate 20:1). Colorless oil (41 mg, 67% yield). **<sup>1</sup>H NMR** (400 MHz, CDCl<sub>3</sub>) δ 9.65 (s, 1H), 7.13 (d, *J* = 7.7 Hz, 1H), 7.07 (s, 1H), 7.03 (d, *J* = 7.6 Hz, 1H), 2.49-2.44 (m, 1H), 2.37-2.31 (m, 3H), 2.27 (s, 3H), 2.26 (s, 3H), 2.00-1.95 (m, 1H), 1.34-1.21 (m, 8H), 0.86 (t, *J* = 6.9 Hz, 3H); **<sup>13</sup>C NMR** (101 MHz, CDCl<sub>3</sub>) δ 202.7, 154.08 (dd, *J* = 290.4, 286.5 Hz), 136.8, 136.0, 130.6 (t, *J* = 3.03 Hz), 129.9, 129.5 (t, *J* = 2.9 Hz), 125.7 (t, *J* = 2.9 Hz), 90.8 (dd, *J* = 20.8, 13.8 Hz), 48.0, 33.8, 32.3, 32.0, 31.4 (t, *J* = 2.2 Hz), 26.1, 22.6, 19.9, 19.5, 14.1; **<sup>19</sup>F NMR** (376 MHz, CDCl<sub>3</sub>) δ -90.96 (d, *J* = 43.5 Hz, 1F), -91.27 (d, *J* = 43.5 Hz, 1F); **HRMS (ESI)** *m/z*: [M+H]<sup>+</sup> Calcd for C<sub>19</sub>H<sub>27</sub>F<sub>2</sub>O 309.2030; Found 309.2018.

### 3-(1,1-difluoro-4-(2-oxoethyl)non-1-en-2-yl)benzonitrile (3i):

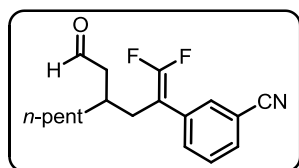

R<sub>f</sub>: 0.5 (petroleum ether/ethyl acetate 20:1). Colorless oil (40 mg, 65% yield). **<sup>1</sup>H NMR** (400 MHz, CDCl<sub>3</sub>) δ 9.69 (t, *J* = 1.7 Hz, 1H), 7.62-7.56 (m, 3H), 7.51-7.47 (m, 1H), 2.44-2.30 (m, 4H), 1.96-1.88 (m, 1H), 1.33-1.18 (m, 8H), 0.85 (t, *J* = 7.1 Hz, 3H); **<sup>13</sup>C NMR** (101 MHz, CDCl<sub>3</sub>) δ 201.8, 154.5 (dd, *J* = 293.3, 289.1 Hz), 134.8 (t, *J* = 4.1 Hz), 132.7 (t, *J* = 3.2 Hz), 131.9 (t, *J* = 3.4 Hz), 131.1, 129.6, 118.5, 113.1, 89.9 (dd, *J* = 23.1, 12.5 Hz), 47.9, 33.6, 31.9, 31.1 (t, *J* = 1.9 Hz), 26.1, 22.6, 14.0; **<sup>19</sup>F NMR** (376 MHz, CDCl<sub>3</sub>) δ -87.87 (d, *J* = 36.7 Hz, 1F), -88.45 (d, *J* = 36.9 Hz, 1F). **HRMS (ESI)** *m/z*: [M+H]<sup>+</sup> calcd for C<sub>18</sub>H<sub>22</sub>F<sub>2</sub>NO 306.1669; Found 306.1665.

### 3-(2-(benzo[d][1,3]dioxol-5-yl)-3,3-difluoroallyl)octanal (3j):

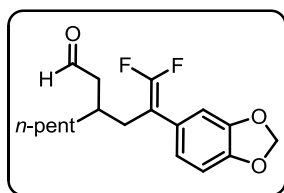

R<sub>f</sub>: 0.56 (petroleum ether/ethyl acetate 20:1). Colorless oil (45 mg, 70% yield). **<sup>1</sup>H NMR** (400 MHz, CDCl<sub>3</sub>) δ 9.66 (s, 1H), 6.81-6.74 (m, 3H), 5.97 (s, 2H), 2.43-2.38 (m, 1H), 2.33-2.29 (m, 3H), 1.99-1.95 (m, 1H), 1.33-1.21 (m, 8H), 0.86 (t, *J* = 6.9 Hz, 3H); **<sup>13</sup>C NMR** (101 MHz, CDCl<sub>3</sub>) δ 202.4, 154.1 (dd, *J* = 290.3,

286.6 Hz), 147.9, 147.0, 126.8 (t,  $J = 3.03$  Hz), 121.9 (t,  $J = 3.0$  Hz), 108.8 (t,  $J = 3.2$  Hz), 108.5, 101.3, 90.7 (dd,  $J = 22.0, 13.7$  Hz), 48.0, 33.8, 32.5, 32.0, 31.3 (t,  $J = 2.2$  Hz), 26.2, 22.6, 14.1;  **$^{19}\text{F}$  NMR** (376 MHz,  $\text{CDCl}_3$ )  $\delta$  -90.75 (d,  $J = 43.3$  Hz, 1F), -91.19 (d,  $J = 43.4$  Hz, 1F); **HRMS (ESI)**  $m/z$ :  $[\text{M}+\text{H}]^+$  Calcd for  $\text{C}_{18}\text{H}_{23}\text{F}_2\text{O}_3$  325.1615; Found 325.1608.

### 3-(3,3-difluoro-2-(naphthalen-2-yl)allyl)octanal (3k):

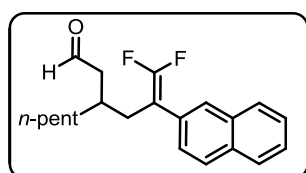

$R_f$ : 0.6 (petroleum ether/ethyl acetate 20:1). Colorless oil (33 mg, 50% yield).  **$^1\text{H}$  NMR** (400 MHz,  $\text{CDCl}_3$ )  $\delta$  9.64 (s, 1H), 7.86-7.78 (m, 4H), 7.51-7.42 (m, 3H), 2.62-2.47 (m, 2H), 2.36-2.35 (m, 2H), 2.03-2.00 (m, 1H), 1.38-1.24 (m, 8H), 0.84 (t,  $J = 6.6$  Hz, 3H);  **$^{13}\text{C}$  NMR** (101 MHz,  $\text{CDCl}_3$ )  $\delta$  202.4, 154.4 (dd,  $J = 291.5, 287.6$  Hz), 133.4, 132.6, 130.7 (t,  $J = 3.0$  Hz), 128.4, 128.0, 127.7, 127.5 (t,  $J = 3.1$  Hz), 126.5, 126.4, 126.0 (t,  $J = 3.0$  Hz), 91.1 (dd,  $J = 21.1, 13.6$  Hz), 48.0, 33.8, 32.3, 31.9, 31.5 (t,  $J = 2.3$  Hz), 26.2, 22.6, 14.1;  **$^{19}\text{F}$  NMR** (376 MHz,  $\text{CDCl}_3$ )  $\delta$  -89.93 (d,  $J = 40.9$  Hz, 1F), -90.19 (d,  $J = 40.9$  Hz, 1F); **HRMS (ESI)**  $m/z$ :  $[\text{M}+\text{H}]^+$  Calcd for  $\text{C}_{21}\text{H}_{25}\text{F}_2\text{O}$  331.1873; Found 331.1868.

### 3-(3,3-difluoro-2-(quinolin-6-yl)allyl)octanal (3l):

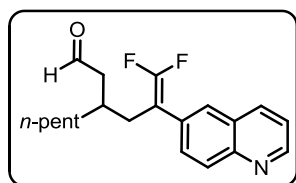

$R_f$ : 0.52 (petroleum ether/ethyl acetate 20:1). Colorless oil (29 mg, 44% yield).  **$^1\text{H}$  NMR** (400 MHz,  $\text{CDCl}_3$ )  $\delta$  9.69 (s, 1H), 8.89 (s, 1H), 8.11 (d,  $J = 7.8$  Hz, 2H), 7.84 (d,  $J = 8.1$  Hz, 1H), 7.73 (t,  $J = 7.6$  Hz, 1H), 7.58 (t,  $J = 7.5$  Hz, 1H), 2.61-2.51 (m, 2H), 2.40-2.39 (m, 2H), 2.04-1.98 (m, 1H), 1.37-1.19 (m, 8H), 0.82 (t,  $J = 7.0$  Hz, 3H);  **$^{13}\text{C}$  NMR** (101 MHz,  $\text{CDCl}_3$ )  $\delta$  201.9, 154.7 (dd,  $J = 293.1, 289.1$  Hz), 150.1, 147.2, 135.1, 129.9, 129.3, 127.9, 127.7, 127.3, 126.5 (t,  $J = 4.3$  Hz), 88.7 (dd,  $J = 23.2, 13.4$  Hz), 48.0, 33.7, 32.0, 31.9, 31.3 (t,  $J = 2.1$  Hz), 26.2, 22.6, 14.0;  **$^{19}\text{F}$  NMR** (376 MHz,  $\text{CDCl}_3$ )  $\delta$  -87.88 (d,  $J = 37.4$  Hz, 1F), -88.63 (d,  $J = 37.5$  Hz, 1F); **HRMS (ESI)**  $m/z$ :  $[\text{M}+\text{H}]^+$  Calcd for  $\text{C}_{20}\text{H}_{24}\text{F}_2\text{NO}$  332.1826; Found 332.1818.

**5-(biphenyl-4-yl)-6,6-difluorohex-5-enal (3m):**

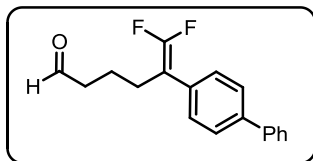

$R_f$ : 0.6 (petroleum ether/ethyl acetate 20:1). Colorless oil (30 mg, 52% yield).  $^1\text{H NMR}$  (400 MHz,  $\text{CDCl}_3$ )  $\delta$  9.75 (s, 1H), 7.60 (d,  $J = 8.1$  Hz, 4H), 7.47-7.34 (m, 5H), 2.53-2.45 (m, 4H), 1.80-1.72 (m, 2H);  $^{13}\text{C NMR}$  (101 MHz,  $\text{CDCl}_3$ )  $\delta$  201.9, 153.9 (t,  $J = 289.5$  Hz), 140.5, 140.3, 132.1, 128.9, 128.6 (t,  $J = 3.3$  Hz), 127.5, 127.3, 127.1, 91.5 (dd,  $J = 18.2, 16.6$  Hz), 43.0, 26.9, 20.3 (t,  $J = 2.5$  Hz);  $^{19}\text{F NMR}$  (376 MHz,  $\text{CDCl}_3$ )  $\delta$  -90.31 (d,  $J = 41.8$  Hz, 1F), -90.42 (d,  $J = 41.8$  Hz, 1F); **HRMS (ESI)**  $m/z$ :  $[\text{M}+\text{H}]^+$  Calcd for  $\text{C}_{18}\text{H}_{17}\text{F}_2\text{O}$  287.1247; Found 287.1240.

**5-(biphenyl-4-yl)-6,6-difluoro-2-methylhex-5-enal (3n):**

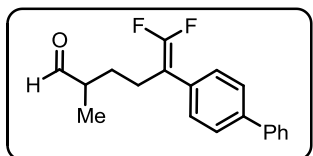

$R_f$ : 0.6 (petroleum ether/ethyl acetate 20:1). Colorless oil (25.9 mg, 43% yield).  $^1\text{H NMR}$  (400 MHz,  $\text{CDCl}_3$ )  $\delta$  9.61 (d,  $J = 1.6$  Hz, 1H), 7.62 (d,  $J = 8.3$  Hz, 4H), 7.48-7.35 (m, 5H), 2.54-2.49 (m, 2H), 2.43-2.34 (m, 1H), 1.91-1.82 (m, 1H), 1.52-1.43 (m, 1H), 1.13 (d,  $J = 7.1$  Hz, 3H);  $^{13}\text{C NMR}$  (101 MHz,  $\text{CDCl}_3$ )  $\delta$  204.4, 153.8 (t,  $J = 290.8$  Hz), 140.5, 140.3, 132.1, 128.9, 128.6 (t,  $J = 3.3$  Hz), 127.5, 127.3, 127.1, 91.6 (dd,  $J = 18.9, 16.0$  Hz), 45.7, 28.6 (t,  $J = 2.5$  Hz), 25.1, 13.3;  $^{19}\text{F NMR}$  (376 MHz,  $\text{CDCl}_3$ )  $\delta$  -90.31 (d,  $J = 41.9$  Hz, 1F), -90.41 (d,  $J = 42.0$  Hz, 1F); **HRMS (ESI)**  $m/z$ :  $[\text{M}+\text{H}]^+$  Calcd for  $\text{C}_{19}\text{H}_{19}\text{F}_2\text{O}$  301.1404; Found 301.1401.

**5-(biphenyl-4-yl)-6,6-difluoro-3,3-dimethylhex-5-enal (3o):**

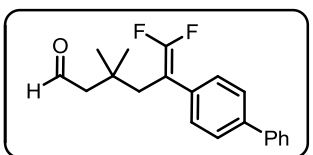

$R_f$ : 0.6 (petroleum ether/ethyl acetate 20:1). Colorless oil (43 mg, 68% yield).  $^1\text{H NMR}$  (400 MHz,  $\text{CDCl}_3$ )  $\delta$  9.70 (t,  $J = 2.2$  Hz, 1H), 7.61-7.58 (m, 4H), 7.44 (t,  $J = 7.6$  Hz, 2H), 7.39-7.33 (m, 3H), 2.54 (s, 2H), 2.21 (d,  $J = 2.3$  Hz, 2H), 1.00 (s, 6H);  $^{13}\text{C NMR}$  (101 MHz,  $\text{CDCl}_3$ )  $\delta$  202.7, 154.7 (dd,  $J = 291.3, 288.5$  Hz), 140.4, 140.2, 133.8 (dd,  $J = 4.3, 3.0$  Hz), 128.95, 128.90, 127.6, 127.3, 127.1, 90.0 (dd,  $J = 21.2, 13.8$  Hz), 54.7, 39.9, 35.4 (t,  $J = 2.4$  Hz), 27.8;  $^{19}\text{F NMR}$  (376 MHz,  $\text{CDCl}_3$ )  $\delta$  -88.33 (d,  $J = 38.3$  Hz, 1F), -90.64 (d,  $J = 38.3$  Hz, 1F); **HRMS (ESI)**  $m/z$ :  $[\text{M} + \text{H}]^+$  Calcd for  $\text{C}_{20}\text{H}_{21}\text{F}_2\text{O}$

315.1560; Found 315.1550

**5-(biphenyl-4-yl)-6,6-difluoro-3-methylhex-5-enal (3p):**

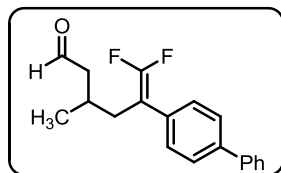

$R_f$ : 0.6 (petroleum ether/ethyl acetate 20:1). Colorless oil (40 mg, 66% yield).  $^1\text{H NMR}$  (400 MHz,  $\text{CDCl}_3$ )  $\delta$  9.70 (t,  $J$  = 1.8 Hz, 1H), 7.61 (d,  $J$  = 8.0 Hz, 4H), 7.47-7.34 (m, 5H), 2.53-2.35 (m, 3H), 2.32-2.25 (m, 1H), 2.19-2.11 (m, 1H), 0.99 (d,  $J$  = 6.6 Hz, 3H);  $^{13}\text{C NMR}$  (101 MHz,  $\text{CDCl}_3$ )  $\delta$  202.1, 154.3 (dd,  $J$  = 291.6, 287.5 Hz), 140.5, 140.4, 132.2 (t,  $J$  = 3.5 Hz), 128.9, 128.7 (t,  $J$  = 3.2 Hz), 127.6, 127.4, 127.1, 90.6 (dd,  $J$  = 21.4, 13.5 Hz), 50.4, 34.5, 26.7 (t,  $J$  = 2.3 Hz), 19.7;  $^{19}\text{F NMR}$  (376 MHz,  $\text{CDCl}_3$ )  $\delta$  -89.92 (d,  $J$  = 41.1 Hz, 1F), -90.21 (d,  $J$  = 41.0 Hz, 1F); **HRMS (ESI)**  $m/z$ :  $[\text{M}+\text{H}^+]$  Calcd for  $\text{C}_{19}\text{H}_{19}\text{F}_2\text{O}$  301.1404; Found 301.1409.

**3-(2-(biphenyl-4-yl)-3,3-difluoroallyl)cyclopentanone (5a):**

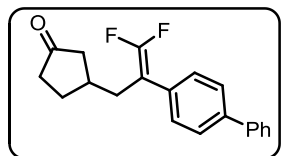

$R_f$ : 0.35 (petroleum ether/ethyl acetate 20:1). Colorless oil (46.8 mg, 75% yield).  $^1\text{H NMR}$  (400 MHz,  $\text{CDCl}_3$ )  $\delta$  7.60 (d,  $J$  = 8.2 Hz, 4H), 7.47-7.43 (m, 2H), 7.40-7.30 (m, 3H), 2.59 (d,  $J$  = 7.1 Hz, 2H), 2.36-2.21 (m, 3H), 2.16-2.06 (m, 2H), 1.87 (dd,  $J$  = 17.3, 9.3 Hz, 1H), 1.64-1.59 (m, 1H);  $^{13}\text{C NMR}$  (101 MHz,  $\text{CDCl}_3$ )  $\delta$  218.7, 154.2 (dd,  $J$  = 290.8, 287.9 Hz), 140.57, 140.53, 132.2 (dd,  $J$  = 3.0 Hz), 128.9, 128.7 (t,  $J$  = 3.0 Hz), 127.6, 127.4, 127.1, 90.9 (dd,  $J$  = 20.8, 14.5 Hz), 44.7, 38.4, 35.6 (t,  $J$  = 2.2 Hz), 33.3, 29.0;  $^{19}\text{F NMR}$  (376 MHz,  $\text{CDCl}_3$ )  $\delta$  -90.48 (d,  $J$  = 42.1 Hz, 1F), -90.66 (d,  $J$  = 42.1 Hz, 1F); **HRMS (ESI)**  $m/z$ :  $[\text{M}+\text{H}]^+$  Calcd for  $\text{C}_{20}\text{H}_{19}\text{F}_2\text{O}$  313.1404; Found 313.1401.

**3-(3,3-difluoro-2-phenylallyl)cyclopentanone (5b):**

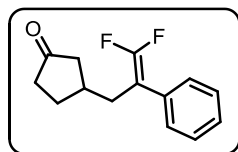

$R_f$ : 0.35 (petroleum ether/ethyl acetate 20:1). Colorless oil (32 mg, 68% yield).  $^1\text{H NMR}$  (400 MHz,  $\text{CDCl}_3$ )  $\delta$  7.39-7.35 (m, 2H), 7.31-7.27 (m, 3H), 2.56-2.53 (m, 2H), 2.32-2.04 (m, 5H), 1.87-1.80 (m, 1H), 1.59-1.52 (m, 1H);  $^{13}\text{C NMR}$  (101 MHz,  $\text{CDCl}_3$ )  $\delta$  218.7, 154.1,

133.3 (d,  $J = 2.0$  Hz), 128.7, 128.3 (t,  $J = 2.9$  Hz), 127.7, 91.2 (dd,  $J = 19.6, 16.0$  Hz), 44.7, 38.4, 35.5 (t,  $J = 2.5$  Hz), 33.4, 29.0;  **$^{19}\text{F}$  NMR** (376 MHz,  $\text{CDCl}_3$ )  $\delta$  -91.12 (d,  $J = 42.9$  Hz, 1F), -91.25 (d,  $J = 42.9$  Hz, 1F); **HRMS (ESI)**  $m/z$ :  $[\text{M}+\text{H}]^+$  Calcd for  $\text{C}_{14}\text{H}_{15}\text{F}_2\text{O}$  237.1091; Found 237.1084.

### 3-(3,3-difluoro-2-*p*-tolylallyl)cyclopentanone (5c):

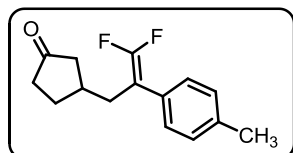

$R_f$ : 0.35 (petroleum ether/ethyl acetate 20:1). Colorless oil (34 mg, 68% yield).  **$^1\text{H}$  NMR** (400 MHz,  $\text{CDCl}_3$ )  $\delta$  7.20 (d,  $J = 8.9$  Hz, 2H), 7.17 (d,  $J = 8.9$  Hz, 2H), 2.54-2.51 (m, 2H), 2.35 (s, 3H), 2.31-2.25 (m, 2H), 2.22-2.15 (m, 1H), 2.13-2.03 (m, 2H), 1.86-1.79 (m, 1H), 1.58-1.51 (m, 1H);  **$^{13}\text{C}$  NMR** (101 MHz,  $\text{CDCl}_3$ )  $\delta$  218.7, 154.0 (t,  $J = 288.4$  Hz), 137.5, 130.3, 129.4, 128.2 (t,  $J = 2.9$  Hz), 91.0 (t,  $J = 17.8$  Hz), 44.7, 38.4, 35.5 (t,  $J = 2.5$  Hz), 33.4, 29.0, 21.2;  **$^{19}\text{F}$  NMR** (376 MHz,  $\text{CDCl}_3$ )  $\delta$  -91.59 (s, 2F); **HRMS (ESI)**  $m/z$ :  $[\text{M}+\text{H}]^+$  Calcd for  $\text{C}_{15}\text{H}_{17}\text{F}_2\text{O}$  251.1247; Found 251.1241.

### 3-(3,3-difluoro-2-(4-methoxyphenyl)allyl)cyclopentanone (5d):

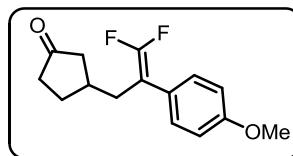

$R_f$ : 0.36 (petroleum ether/ethyl acetate 20:1). Colorless oil (37 mg, 70% yield).  **$^1\text{H}$  NMR** (400 MHz,  $\text{CDCl}_3$ )  $\delta$  7.22 (d,  $J = 8.7$  Hz, 2H), 6.90 (d,  $J = 8.7$  Hz, 2H), 3.81 (s, 3H), 2.52-2.49 (m, 2H), 2.31-2.03 (m, 5H), 1.86-1.79 (m, 1H), 1.60-1.51 (m, 1H);  **$^{13}\text{C}$  NMR** (101 MHz,  $\text{CDCl}_3$ )  $\delta$  218.7, 159.0, 154.0 (t,  $J = 288.0$ ), 129.4 (t,  $J = 3.0$  Hz), 125.4 (d,  $J = 1.6$  Hz), 114.2, 90.6 (dd,  $J = 19.3, 16.6$  Hz), 55.4, 44.7, 38.4, 35.5 (t,  $J = 2.4$  Hz), 33.4, 29.0;  **$^{19}\text{F}$  NMR** (376 MHz,  $\text{CDCl}_3$ )  $\delta$  -92.01 (d,  $J = 45.2$  Hz, 1F), -92.12 (d,  $J = 45.3$  Hz, 1F); **HRMS (ESI)**  $m/z$ :  $[\text{M}+\text{H}]^+$  Calcd for  $\text{C}_{15}\text{H}_{17}\text{F}_2\text{O}_2$  267.1197; Found 267.1187.

### 3-(2-(4-bromophenyl)-3,3-difluoroallyl)cyclopentanone (5e):

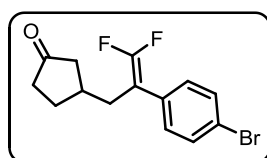

$R_f$ : 0.37 (petroleum ether/ethyl acetate 20:1). Colorless oil (39 mg, 63% yield).  **$^1\text{H}$  NMR** (400 MHz,  $\text{CDCl}_3$ )  $\delta$  7.51-7.48 (m, 2H), 7.19-7.17 (m, 2H), 2.53-2.50 (m, 2H), 2.31-2.25 (m, 2H),



2.20-2.02 (m, 3H), 1.86-1.79 (m, 1H), 1.58-1.50 (m, 1H);  $^{13}\text{C}$  NMR (101 MHz,  $\text{CDCl}_3$ )  $\delta$  218.3, 154.0 (dd,  $J = 291.3, 288.1$  Hz), 132.3 (dd,  $J = 3.9, 2.8$  Hz), 131.9, 129.9 (t,  $J = 3.1$  Hz), 121.7, 90.5 (dd,  $J = 22.1, 14.2$  Hz), 44.6, 38.3, 35.5 (t,  $J = 2.4$  Hz), 33.2, 29.0;  $^{19}\text{F}$  NMR (376 MHz,  $\text{CDCl}_3$ )  $\delta$  -90.01 (d,  $J = 40.8$  Hz, 1F), -90.23 (d,  $J = 40.8$  Hz, 1F); HRMS (ESI)  $m/z$ :  $[\text{M}+\text{H}]^+$  Calcd for  $\text{C}_{14}\text{H}_{14}\text{BrF}_2\text{O}$  315.0196; Found 315.0190.

**5-(2-(biphenyl-4-yl)-3,3-difluoroallyl)dihydrofuran-3(2H)-one (5f):**

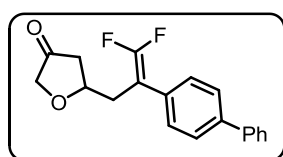

$R_f$ : 0.32 (petroleum ether/ethyl acetate 20:1). Colorless oil (38 mg, 60% yield).  $^1\text{H}$  NMR (400 MHz,  $\text{CDCl}_3$ )  $\delta$  7.61-7.59 (m, 4H), 7.47-7.41 (m, 4H), 7.38-7.34 (m, 1H), 4.31-4.26 (m, 1H), 4.07-4.00 (m, 1H), 3.72 (dd,  $J = 9.0, 4.1$  Hz, 1H), 2.87-2.80 (m, 1H), 2.73-2.66 (m, 1H), 2.47 (dd,  $J = 7.8, 6.6$  Hz, 2H);  $^{13}\text{C}$  NMR (101 MHz,  $\text{CDCl}_3$ )  $\delta$  215.1, 154.5 (dd,  $J = 290.8, 288.8$  Hz), 140.59, 140.57, 131.5 (t,  $J = 3.6$  Hz), 129.0 (t,  $J = 3.1$  Hz), 128.9, 127.6, 127.3, 127.1 88.6 (dd,  $J = 21.2, 16.3$  Hz), 77.3, 64.4, 36.8, 29.3 (d,  $J = 2.0$  Hz);  $^{19}\text{F}$  NMR (376 MHz,  $\text{CDCl}_3$ )  $\delta$  -88.7 (d,  $J = 38.7$  Hz, 1F), -89.5 (d,  $J = 38.6$  Hz, 1F); HRMS (ESI)  $m/z$ :  $[\text{M}+\text{H}]^+$  Calcd for  $\text{C}_{19}\text{H}_{17}\text{F}_2\text{O}_2$  315.1197; Found 315.1190.

**3-(2-(biphenyl-4-yl)-3,3-difluoroallyl)cyclohexanone (5g):**

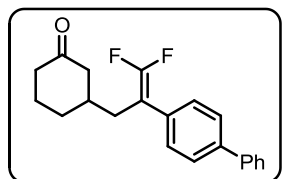

$R_f$ : 0.35 (petroleum ether/ethyl acetate 20:1). Colorless oil (46 mg, 70% yield).  $^1\text{H}$  NMR (400 MHz,  $\text{CDCl}_3$ )  $\delta$  7.62-7.58 (m, 4H), 7.47-7.43 (m, 2H), 7.39-7.34 (m, 3H), 2.55-2.41 (m, 3H), 2.37-2.31 (m, 1H), 2.29-2.20 (m, 1H), 2.09-1.99 (m, 2H), 1.93-1.80 (m, 2H), 1.63-1.52 (m, 1H), 1.44-1.34 (m, 1H);  $^{13}\text{C}$  NMR (101 MHz,  $\text{CDCl}_3$ )  $\delta$  211.0, 154.2 (dd,  $J = 291.6, 287.2$  Hz), 140.5, 140.4, 132.1 (t,  $J = 3.0$  Hz), 128.9, 128.6 (t,  $J = 3.1$  Hz), 127.5, 127.3, 127.1, 90.1 (dd,  $J = 21.6, 13.7$  Hz), 47.6, 41.3, 37.1 (t,  $J = 2.4$  Hz), 34.5, 30.9, 25.0;  $^{19}\text{F}$  NMR (376 MHz,  $\text{CDCl}_3$ )  $\delta$  -89.91 (d,  $J = 41.4$  Hz, 1F), -90.22 (d,  $J = 41.4$  Hz, 1F); HRMS (ESI)  $m/z$ :  $[\text{M}+\text{H}]^+$  Calcd for  $\text{C}_{21}\text{H}_{21}\text{F}_2\text{O}$  327.1560; Found 327.1552.

### 3-(2-(biphenyl-4-yl)-3,3-difluoroallyl)-4,4-dimethylcyclohexanone (5h):

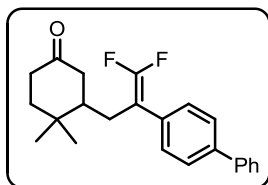

$R_f$ : 0.35 (petroleum ether/ethyl acetate 20:1). Colorless oil (46 mg, 65% yield).  $^1\text{H NMR}$  (400 MHz,  $\text{CDCl}_3$ )  $\delta$  7.61-7.58 (m, 4H), 7.46-7.43 (m, 2H), 7.37-7.34 (m, 3H), 2.73-2.66 (m, 1H), 2.44-2.33 (m, 2H), 2.27-2.21 (m, 2H), 2.13-2.06 (m, 1H), 1.72-1.66 (m, 1H), 1.56-1.50 (m, 2H), 1.10 (s, 3H), 1.06 (s, 3H);  $^{13}\text{C NMR}$  (101 MHz,  $\text{CDCl}_3$ )  $\delta$  211.2, 153.2 (dd,  $J = 291.4$ , 287.0 Hz), 140.5, 140.4, 131.8 (t,  $J = 3.7$  Hz), 128.9, 128.6 (t,  $J = 3.1$  Hz), 127.6, 127.4, 127.1, 90.3 (dd,  $J = 21.6$ , 13.4 Hz), 44.1, 42.4, 40.2, 38.2, 32.8, 28.9, 28.7, 19.3;  $^{19}\text{F NMR}$  (376 MHz,  $\text{CDCl}_3$ )  $\delta$  -89.87 (d,  $J = 42.0$  Hz, 1F), -90.39 (d,  $J = 42.0$  Hz, 1F); **HRMS (ESI)**  $m/z$ :  $[\text{M}+\text{H}^+]$  Calcd for  $\text{C}_{23}\text{H}_{25}\text{F}_2\text{O}$  355.1873; Found 355.1868.

### 3-(2-(biphenyl-4-yl)-3,3-difluoroallyl)-4-methylcyclohexanone (5i):

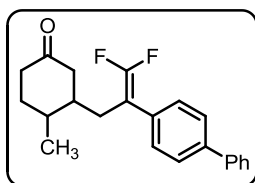

$R_f$ : 0.35 (petroleum ether/ethyl acetate 20:1). Colorless oil (42 mg, 62% yield). A mixture of two inseparable diastereomers (dr = 14:1).  $^1\text{H NMR}$  (400 MHz,  $\text{CDCl}_3$ )  $\delta$  7.61-7.58 (m, 4H), 7.47-7.43 (m, 2H), 7.38-7.34 (m, 3H), 2.85-2.78 (m, 1H), 2.44 (dd,  $J = 14.4$ , 4.1 Hz, 1H), 2.34-2.26 (m, 3H), 2.04-1.95 (m, 2H), 1.70-1.59 (m, 1H), 1.55-1.35 (m, 2H), 1.07 (d,  $J = 6.5$  Hz, 3H);  $^{13}\text{C NMR}$  (101 MHz,  $\text{CDCl}_3$ )  $\delta$  211.2, 154.2 (dd,  $J = 291.2$ , 287.6 Hz), 140.5, 140.4, 132.0 (t,  $J = 3.0$  Hz), 128.9, 128.6 (t,  $J = 3.1$  Hz), 127.6, 127.4, 127.1, 90.1 (dd,  $J = 20.8$ , 14.1 Hz), 45.4, 42.3 (t,  $J = 1.9$  Hz), 40.9, 35.7, 34.0, 32.3, 19.0;  $^{19}\text{F NMR}$  (376 MHz,  $\text{CDCl}_3$ )  $\delta$  -90.02 (d,  $J = 41.9$  Hz, 1F), -90.20 (d,  $J = 41.7$  Hz, 1F); **HRMS (ESI)**  $m/z$ :  $[\text{M}+\text{H}]^+$  Calcd for  $\text{C}_{22}\text{H}_{23}\text{F}_2\text{O}$  341.1717; Found 341.1709.

### 2-(2-(biphenyl-4-yl)-3,3-difluoroallyl)dihydro-2H-pyran-4(3H)-one (5j):

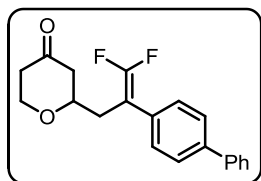

$R_f$ : 0.32 (petroleum ether/ethyl acetate 20:1). Colorless oil (39 mg, 59% yield).  $^1\text{H NMR}$  (400 MHz,  $\text{CDCl}_3$ )  $\delta$  7.60 (d,  $J = 8.1$  Hz, 4H), 7.47-7.34 (m, 5H), 4.30-4.25 (m, 1H), 3.64-3.53 (m, 2H), 2.89-2.82 (m, 1H), 2.65-2.54 (m, 2H), 2.45-2.40 (m, 1H),

2.35-2.27 (m, 2H);  $^{13}\text{C}$  NMR (101 MHz,  $\text{CDCl}_3$ )  $\delta$  206.3, 154.6 (dd,  $J = 291.1$ , 288.7 Hz), 140.59, 140.51, 132.0 (t,  $J = 2.7$  Hz), 128.9, 128.7 (t,  $J = 3.1$  Hz), 127.6, 127.4, 127.1, 88.6 (dd,  $J = 20.7$ , 16.3 Hz), 75.8 (t,  $J = 2.9$  Hz), 66.5, 47.8, 42.1, 34.7;  $^{19}\text{F}$  NMR (376 MHz,  $\text{CDCl}_3$ )  $\delta$  -89.04 (d,  $J = 38.8$  Hz, 1F), -89.17 (d,  $J = 38.8$  Hz, 1F); HRMS (ESI)  $m/z$ :  $[\text{M}+\text{H}]^+$  Calcd for  $\text{C}_{20}\text{H}_{19}\text{F}_2\text{O}_2$  329.1353; Found 329.1348.

**3-(2-(4-bromophenyl)-3,3-difluoroallyl)octanoic acid (6):**

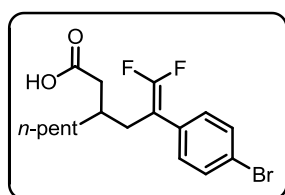

$R_f$ : 0.5 (petroleum ether/ethyl acetate 3:1). Colorless oil (57 mg, 76% yield).  $^1\text{H}$  NMR (400 MHz,  $\text{CDCl}_3$ )  $\delta$  7.48 (d,  $J = 8.3$  Hz, 2H), 7.18 (d,  $J = 8.2$  Hz, 2H), 2.42 (d,  $J = 7.1$  Hz, 2H), 2.33-2.22 (m, 2H), 1.87-1.81 (m, 1H), 1.33-1.19 (m, 8H), 0.85 (t,  $J = 7.0$  Hz, 3H);  $^{13}\text{C}$  NMR (101 MHz,  $\text{CDCl}_3$ )  $\delta$  178.8, 154.1 (dd,  $J = 291.5$ , 288.3 Hz), 132.3 (t,  $J = 3.03$  Hz), 131.8, 130.0 (t,  $J = 3.1$  Hz), 121.5, 90.3 (dd,  $J = 21.5$ , 13.8 Hz), 38.1, 33.3, 33.2, 31.98, 31.90, 26.0, 22.6, 14.1;  $^{19}\text{F}$  NMR (376 MHz,  $\text{CDCl}_3$ )  $\delta$  -89.54 (d,  $J = 40.2$  Hz, 1F), -89.73 (d,  $J = 40.2$  Hz, 1F); HRMS (ESI)  $m/z$ :  $[\text{M}+\text{H}]^+$  Calcd for  $\text{C}_{17}\text{H}_{22}\text{BrF}_2\text{O}_2$  375.0771; Found 375.0768.

**methyl 3-(2-(4-bromophenyl)-3,3-difluoroallyl)octanoate (7):**

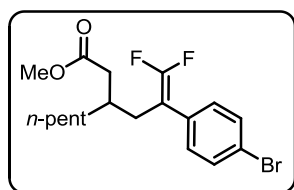

$R_f$ : 0.7 (petroleum ether/ethyl acetate 10:1). Colorless oil (54 mg, 70% yield).  $^1\text{H}$  NMR (400 MHz,  $\text{CDCl}_3$ )  $\delta$  7.48 (d,  $J = 8.3$  Hz, 2H), 7.19 (d,  $J = 8.1$  Hz, 2H), 3.63 (s, 3H), 2.39 (d,  $J = 6.2$  Hz, 2H), 2.29-2.17 (m, 2H), 1.84-1.80 (m, 1H), 1.25-1.19 (m, 8H), 0.85 (t,  $J = 7.0$  Hz, 3H);  $^{13}\text{C}$  NMR (101 MHz,  $\text{CDCl}_3$ )  $\delta$  173.4, 154.1 (dd,  $J = 290.9$ , 288.1 Hz), 132.4 (t,  $J = 3.0$  Hz), 131.8, 130.0 (t,  $J = 3.1$  Hz), 121.4, 90. (dd,  $J = 21.3$ , 14.0 Hz), 51.5, 38.2, 33.4, 33.3 (t,  $J = 2.2$  Hz), 32.0, 31.9, 26.0, 22.6, 14.1;  $^{19}\text{F}$  NMR (376 MHz,  $\text{CDCl}_3$ )  $\delta$  -89.73 (d,  $J = 40.5$  Hz, 1F), -89.90 (d,  $J = 40.5$  Hz, 1F). HRMS (ESI)  $m/z$ :  $[\text{M}+\text{H}]^+$  Calcd for  $\text{C}_{18}\text{H}_{24}\text{BrF}_2\text{O}_2$  389.0928; Found 389.0925.

***trans*-3-(2-(biphenyl-4-yl)-3,3-difluoroallyl)cyclohexanol (8):**

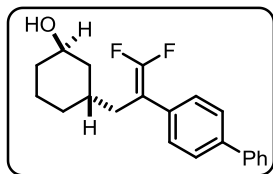

R<sub>f</sub>: 0.3 (petroleum ether/ethyl acetate 5:1). Colorless oil (54.3 mg, 55% yield). **<sup>1</sup>H NMR** (400 MHz, CDCl<sub>3</sub>) δ 7.63-7.59 (m, 4H), 7.47-7.34 (m, 5H), 3.52-3.45 (m, 1H), 2.44-2.33 (m, 2H), 2.04-1.92 (m, 2H), 1.78-1.66 (m, 2H), 1.47-1.36 (m, 1H), 1.31-1.08 (m, 2H), 0.99-0.82 (m, 2H); **<sup>13</sup>C NMR** (101 MHz, CDCl<sub>3</sub>) δ 154.2 (dd, *J* = 291.0, 286.7 Hz), 140.6, 140.1, 132.8 (t, *J* = 4.04 Hz), 128.9, 128.6 (t, *J* = 3.2 Hz), 127.5, 127.2, 127.1, 90.6 (dd, *J* = 22.0, 12.8 Hz), 70.6, 42.0, 35.7, 34.8, 34.7 (t, *J* = 2.3 Hz), 31.8, 23.9; **<sup>19</sup>F NMR** (376 MHz, CDCl<sub>3</sub>) δ -90.22 (d, *J* = 42.3 Hz, 1F), -90.76 (d, *J* = 42.3 Hz, 1F); **HRMS (ESI)** *m/z*: [M+H]<sup>+</sup> Calcd for C<sub>21</sub>H<sub>23</sub>F<sub>2</sub>O 329.1717; Found 329.1710.

***cis*-3-(2-(biphenyl-4-yl)-3,3-difluoroallyl)cyclohexanol (8')**:

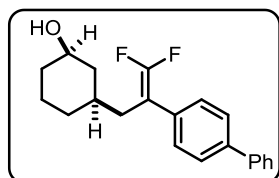

R<sub>f</sub>: 0.45 (petroleum ether/ethyl acetate 5:1). Colorless oil (19.7 mg, 20% yield). **<sup>1</sup>H NMR** (400 MHz, CDCl<sub>3</sub>) δ 7.61-7.57 (m, 4H), 7.46-7.33 (m, 5H), 4.06 (s, 1H), 2.35 (d, *J* = 7.2 Hz, 2H), 1.81-1.53 (m, 5H), 1.38-1.26 (m, 3H), 1.08-0.99 (m, 1H); **<sup>13</sup>C NMR** (101 MHz, CDCl<sub>3</sub>) δ 154.2 (dd, *J* = 291.0, 286.5 Hz), 140.7, 140.1, 132.8 (t, *J* = 3.03 Hz), 128.9, 128.7 (t, *J* = 3.2 Hz), 127.5, 127.2, 127.1, 90.7 (dd, *J* = 21.9, 12.7 Hz), 66.7, 39.3, 34.3, 33.3, 31.7, 30.1 (t, *J* = 2.1 Hz), 19.9; **<sup>19</sup>F NMR** (376 MHz, CDCl<sub>3</sub>) δ -90.54 (d, *J* = 43.0 Hz, 1F), -90.96 (d, *J* = 42.9 Hz, 1F); **HRMS (ESI)** *m/z*: [M+H]<sup>+</sup> Calcd for C<sub>21</sub>H<sub>23</sub>F<sub>2</sub>O 329.1717; Found 329.1710.

**3-(2-(biphenyl-4-yl)-3,3-difluoroallyl)-1-(phenylethynyl)cyclohexanol (9):**

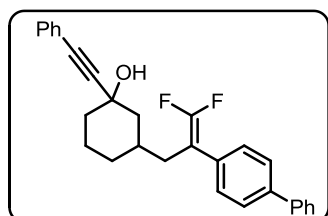

R<sub>f</sub>: 0.54 (petroleum ether/ethyl acetate 5:1). Colorless oil (51.3 mg, 60% yield, dr >20:1). **<sup>1</sup>H NMR** (400 MHz, CDCl<sub>3</sub>) δ 7.59-7.56 (m, 4H), 7.47-7.35 (m, 5H), 7.20-7.13 (m, 3H), 7.09-7.05 (m, 2H), 2.48-2.236 (m, 2H), 2.18-2.15 (m, 1H), 2.07-2.05 (m, 1H), 1.87-1.75 (m, 2H), 1.59-1.44 (m, 2H), 1.32-1.26 (m, 1H), 1.00-0.91 (m, 1H); **<sup>13</sup>C NMR** (101 MHz, CDCl<sub>3</sub>) δ 154.1 (dd, *J* = 290.1, 287.1 Hz), 140.5, 140.0, 132.7 (t, *J* = 3.03 Hz), 131.6, 128.9, 128.2, 127.5,

127.1, 127.0, 122.6, 91.8, 90.5 (dd,  $J = 21.2, 14.0$  Hz), 85.4, 70.0, 46.1, 40.0, 34.3, 33.9 (t,  $J = 2.0$  Hz), 31.9, 23.5;  **$^{19}\text{F}$  NMR** (376 MHz,  $\text{CDCl}_3$ )  $\delta$  -90.67 (d,  $J = 43.0$  Hz, 1F), -90.87 (d,  $J = 43.0$  Hz, 1F); **HRMS (ESI)**  $m/z$ :  $[\text{M}+\text{H}]^+$  Calcd for  $\text{C}_{29}\text{H}_{27}\text{F}_2\text{O}$  429.2030; Found 429.2024.

### 3-(biphenyl-4-yl)-2-fluoro-5-pentyl-4,5-dihydrooxepine (10):

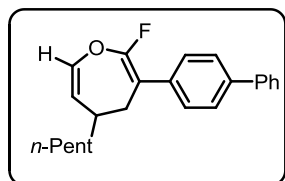

$R_f$ : 0.7 (petroleum ether/ethyl acetate 20:1). Colorless oil (30 mg, 44% yield).  **$^1\text{H}$  NMR** (400 MHz,  $\text{CDCl}_3$ )  $\delta$  7.62-7.57 (m, 4H), 7.46-7.40 (m, 4H), 7.36-7.33 (m, 1H), 6.34 (dd,  $J = 7.2, 2.0$  Hz, 1H), 4.95 (dd,  $J = 7.1, 3.1$  Hz, 1H), 2.67-2.56 (m, 2H), 2.48-2.47 (m, 1H), 1.46-1.27 (m, 8H), 0.87 (t,  $J = 6.8$  Hz, 3H);  **$^{13}\text{C}$  NMR** (101 MHz,  $\text{CDCl}_3$ )  $\delta$  155.9 (d,  $J = 268.1$  Hz), 140.9, 139.6, 139.4, 136.6 (d,  $J = 3.8$  Hz), 128.9, 128.3 (d,  $J = 4.1$  Hz), 127.3, 127.1, 127.0, 116.2 (d,  $J = 1.9$  Hz), 96.5 (d,  $J = 26.2$  Hz), 36.6, 36.3 (d,  $J = 2.1$  Hz), 33.4 (d,  $J = 3.9$  Hz), 32.0, 26.6, 22.6, 14.1;  **$^{19}\text{F}$  NMR** (376 MHz,  $\text{CDCl}_3$ )  $\delta$  -82.17 (s, 1F); **HRMS (ESI)**  $m/z$ :  $[\text{M}+\text{H}]^+$  Calcd for  $\text{C}_{23}\text{H}_{26}\text{FO}$  337.1968; Found 337.1962.

### Reference

1. (a) Ichitsuka, T.; Fujita, T.; Arita, T.; Ichikawa, J. *Angew. Chem., Int. Ed.* **2014**, 53, 7564. (b) Trost, B. M.; Debien, L. *J. Am. Chem. Soc.*, **2015**, 137, 11606.
2. Jiang, H.; Studer, A. *Angew. Chem. Int. Ed.* **2017**, 56, 12273.

# $^1\text{H}$ NMR, $^{13}\text{C}$ NMR and $^{19}\text{F}$ NMR spectra

DA-46

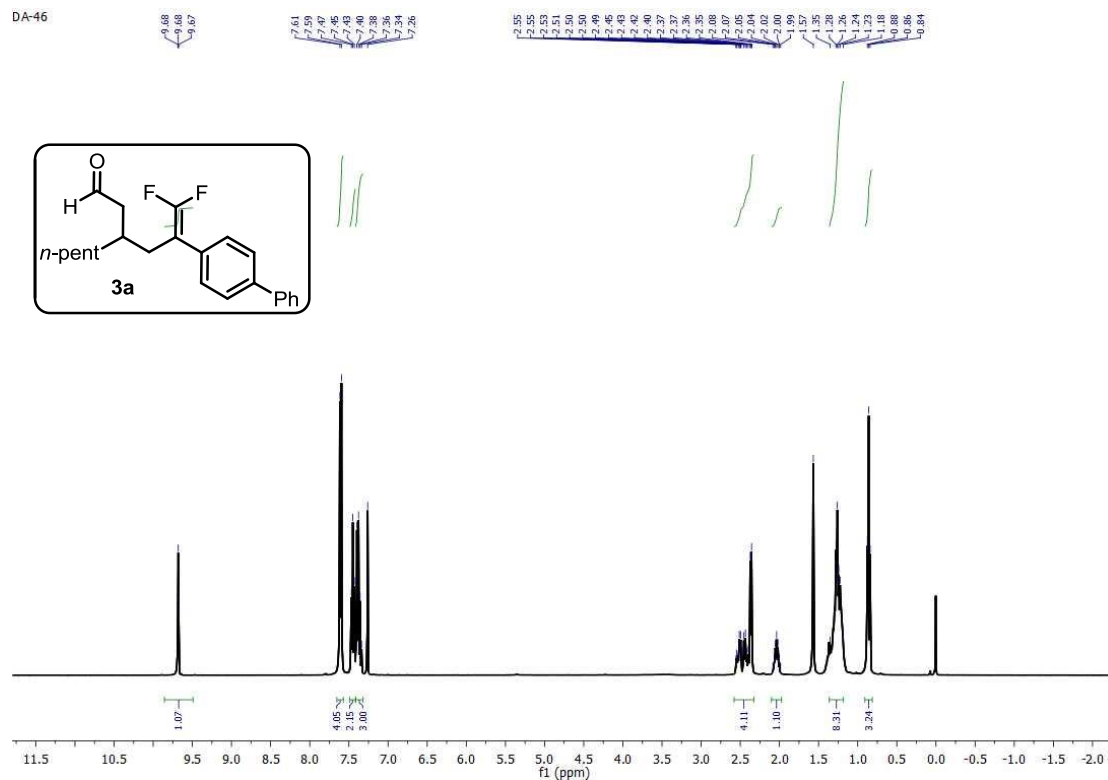

$^1\text{H}$  NMR (400 MHz,  $\text{CDCl}_3$ )

DA-4613C

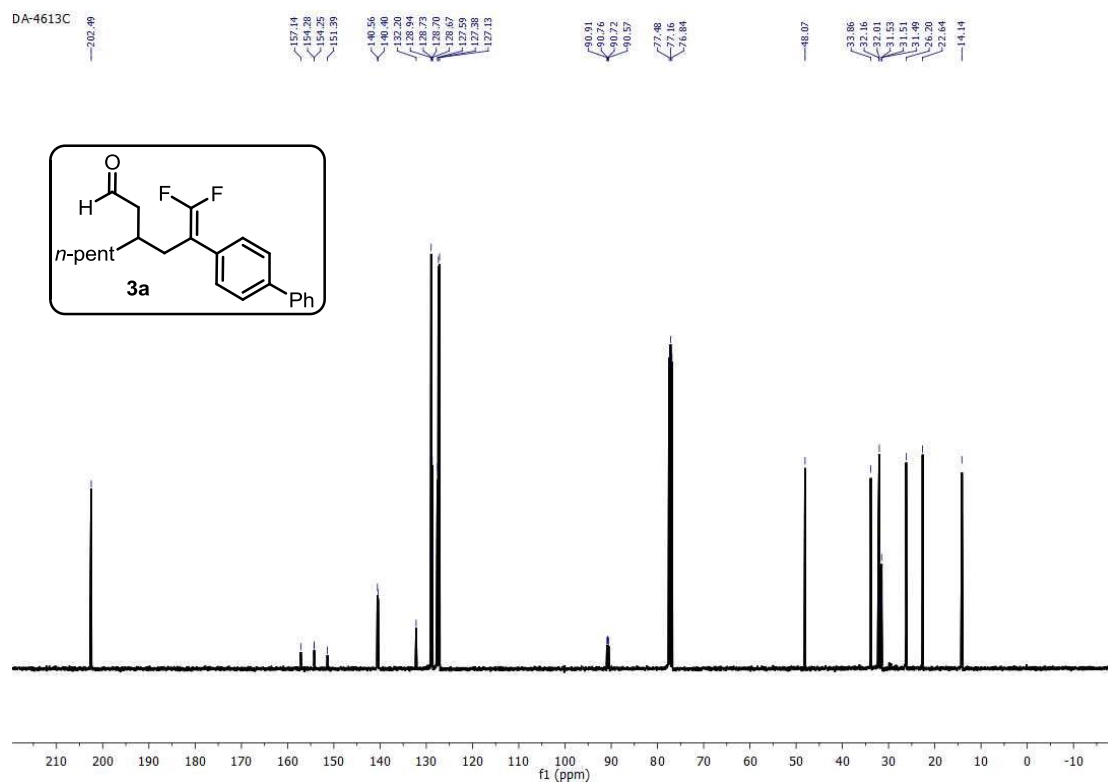

$^{13}\text{C}$  NMR (101 MHz,  $\text{CDCl}_3$ )

DA-46

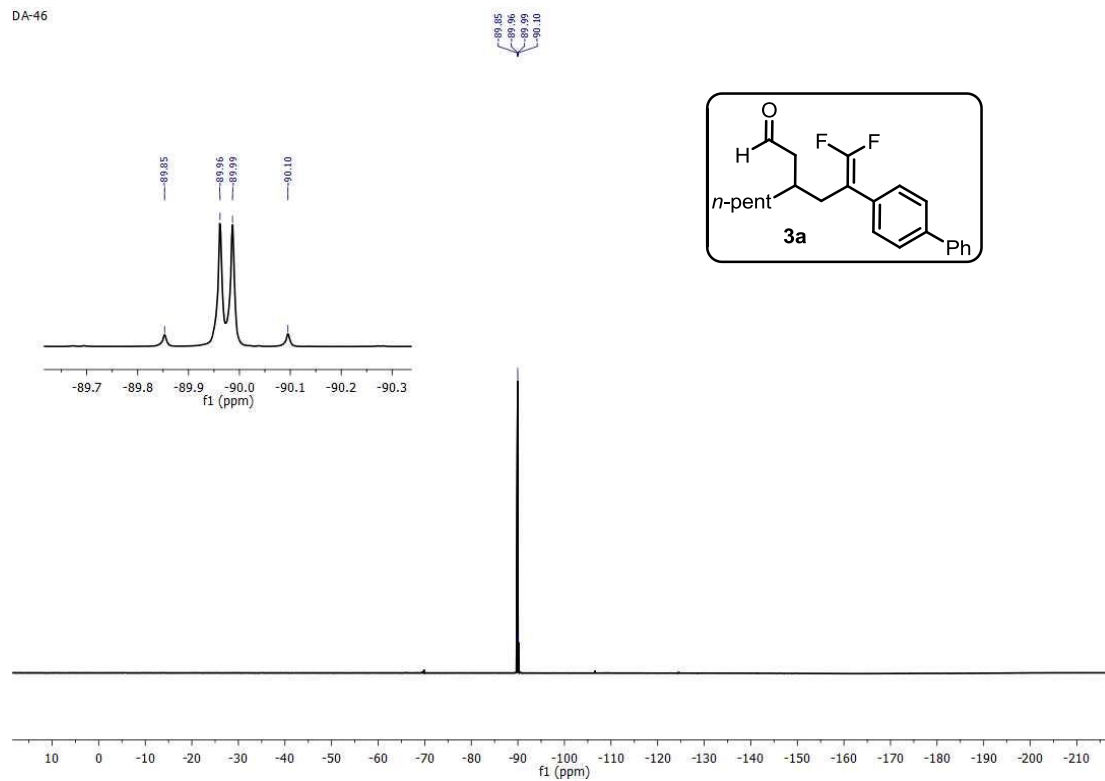

DA-50

PROTON CDCl3 {E:\data2\Anand} Anand 24

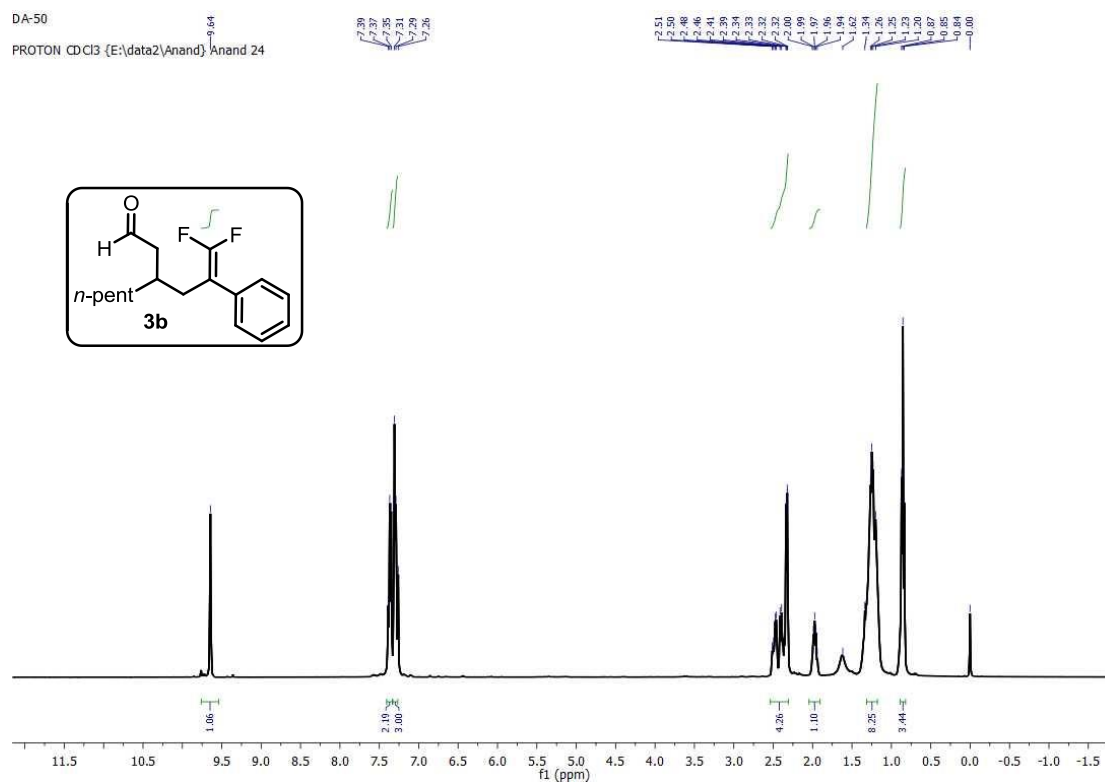

DA-50

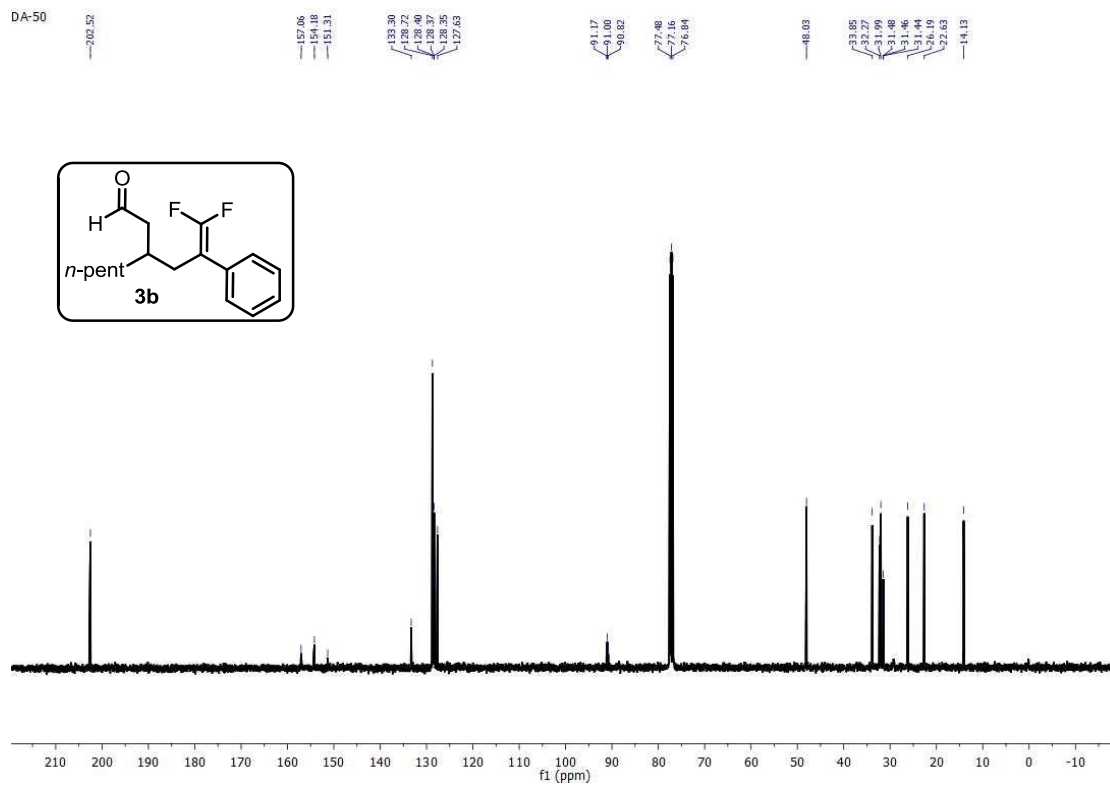

DA-50

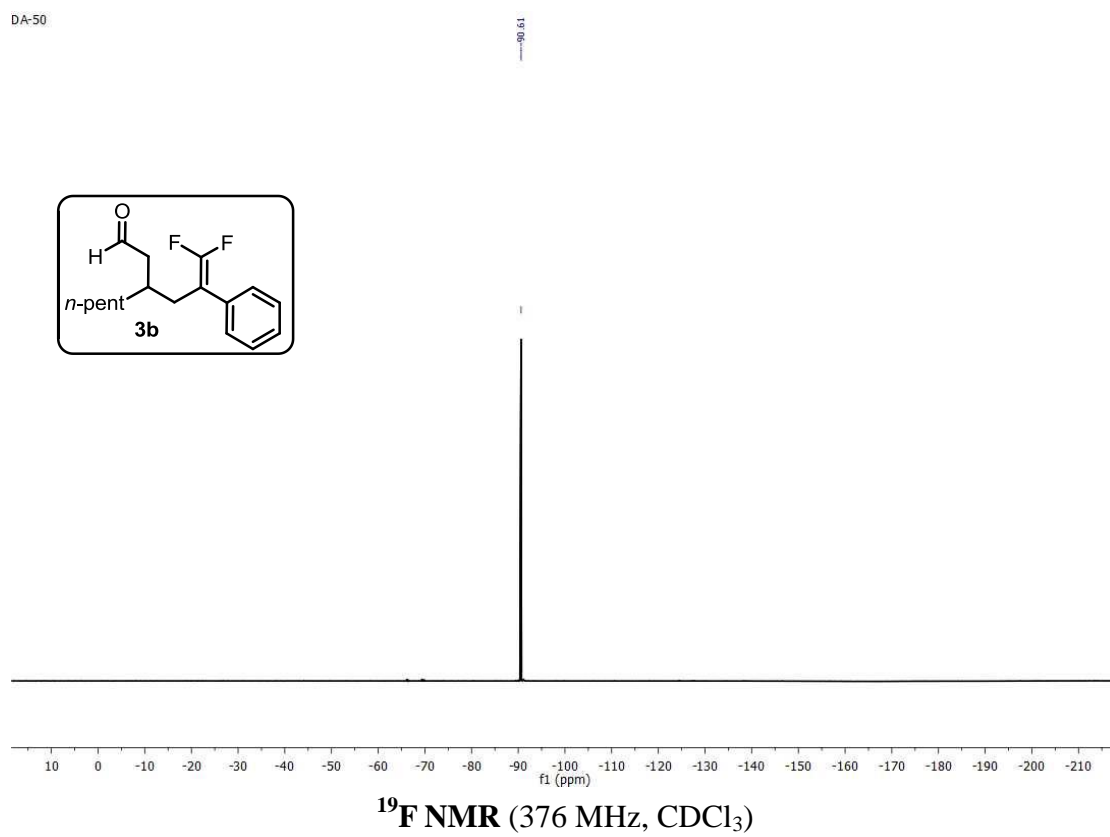



DA-89

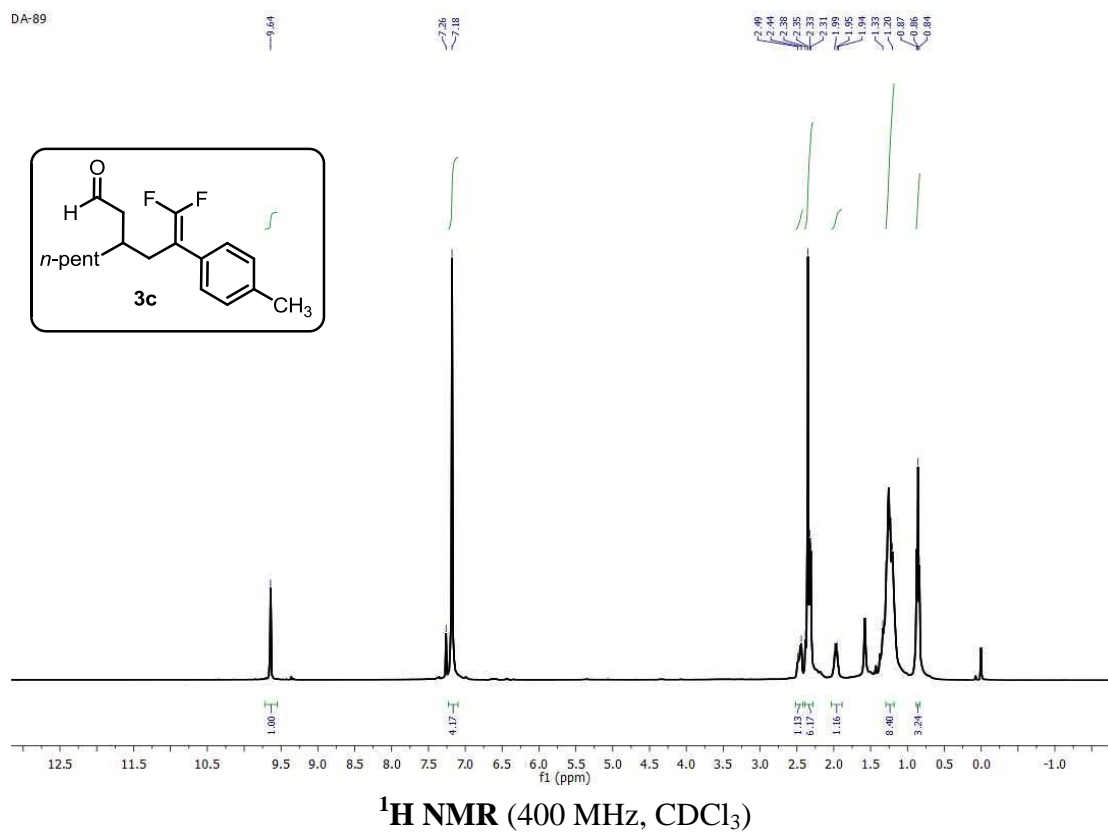

DA-89

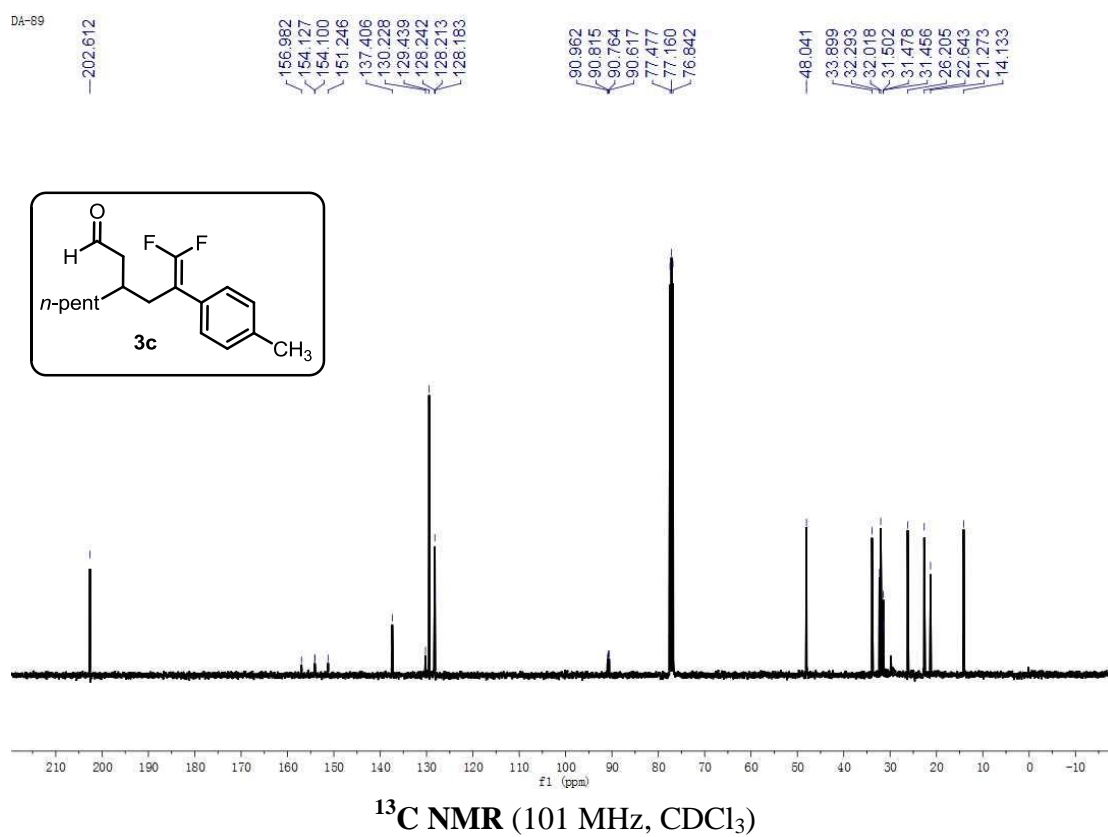

DA-89

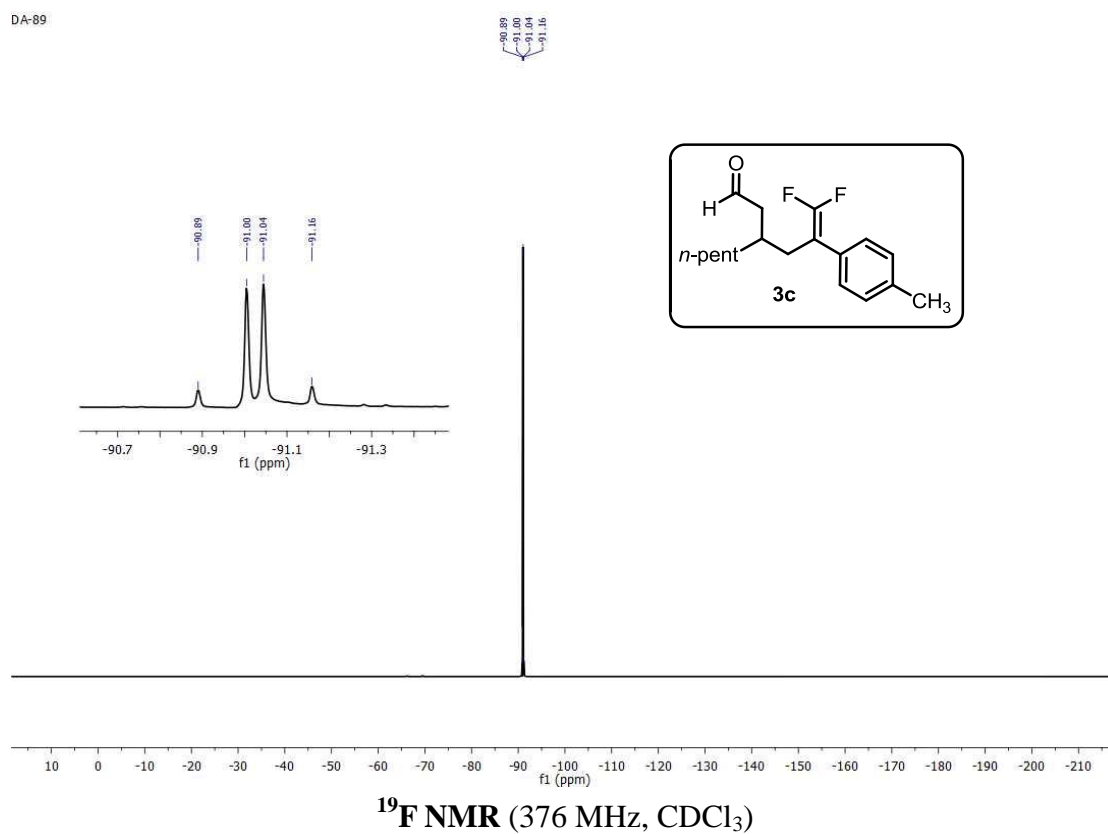

DA-74

PROTON  $\text{CDCl}_3$  {E:\data2\Anand} Anand 6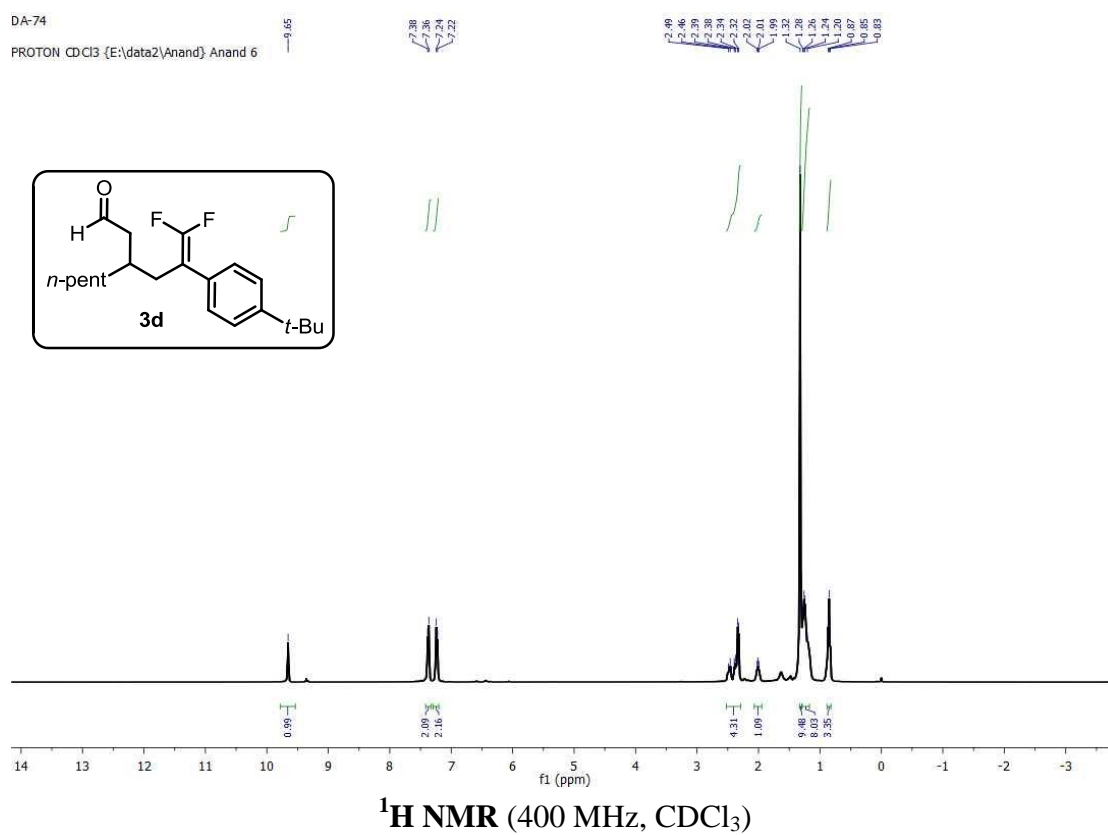

DA-74

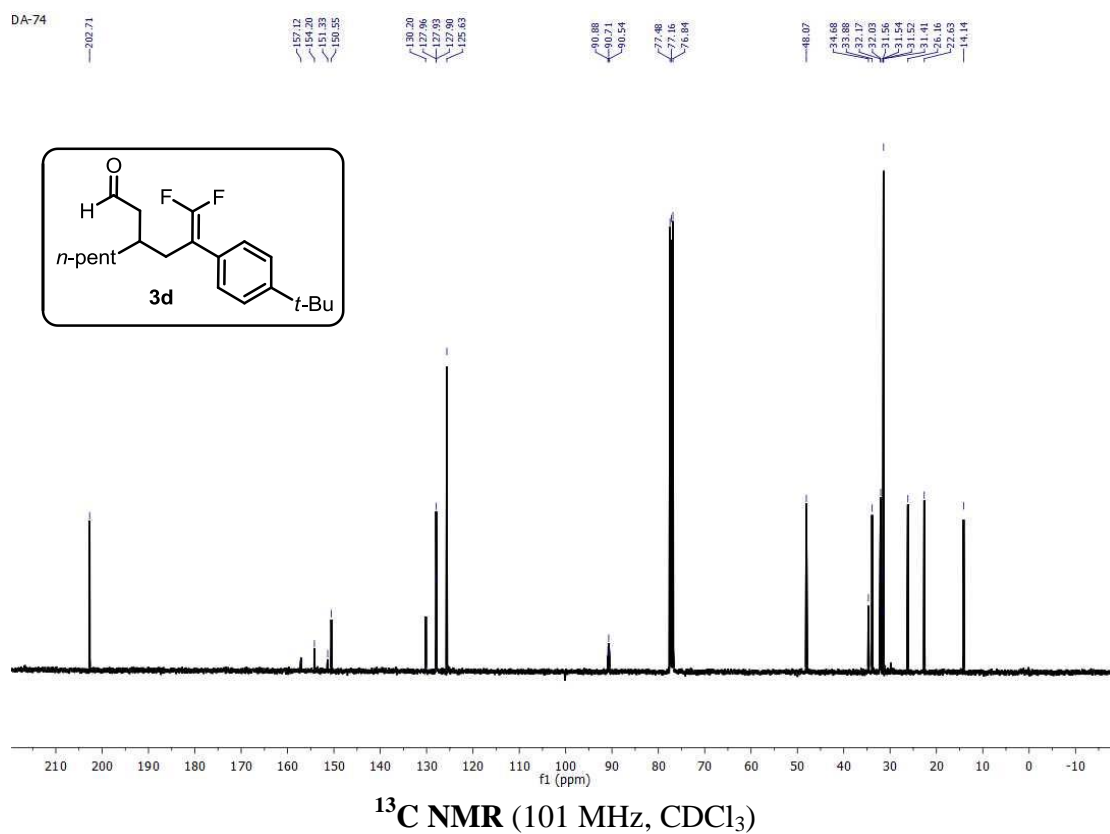

DA-74

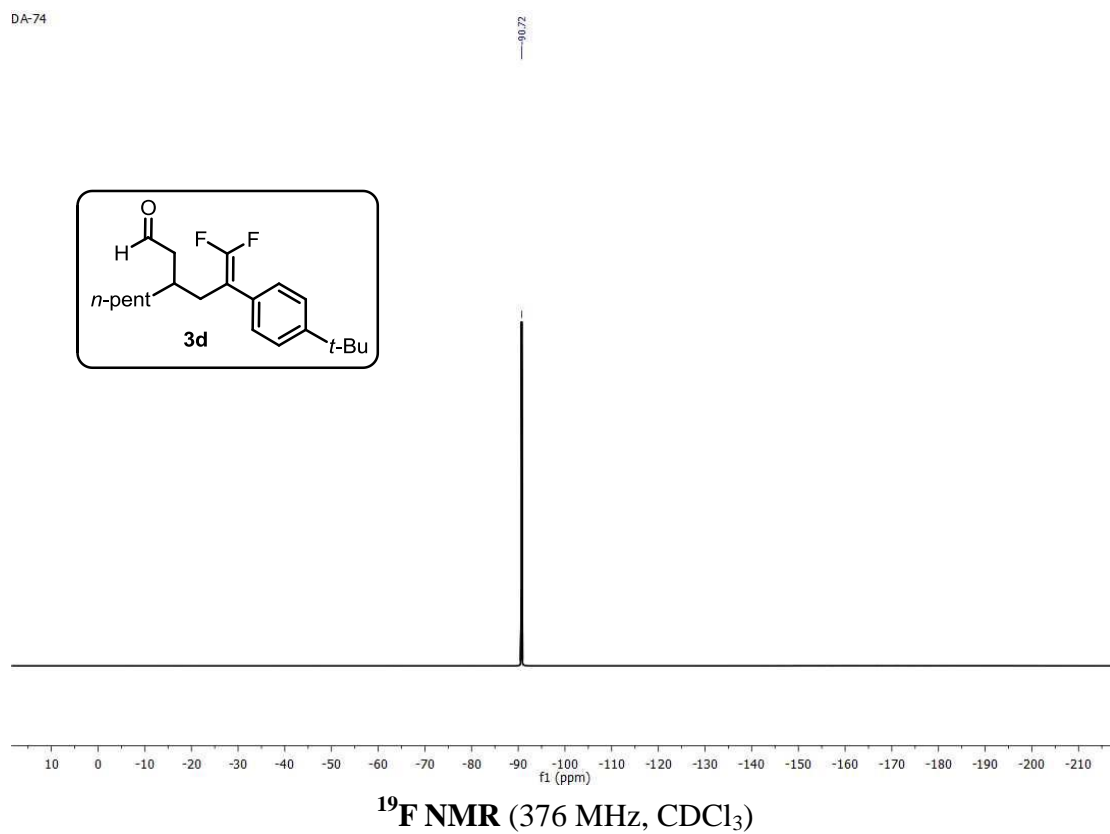



DA-52

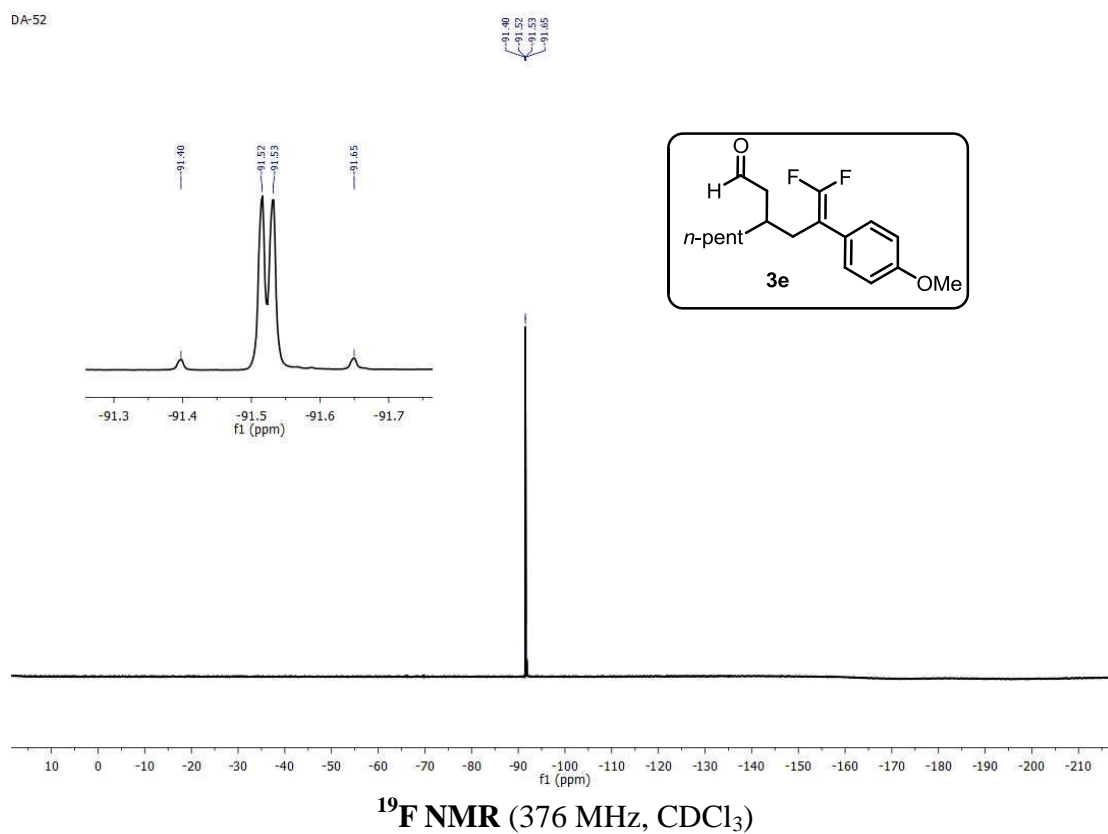

DA-91

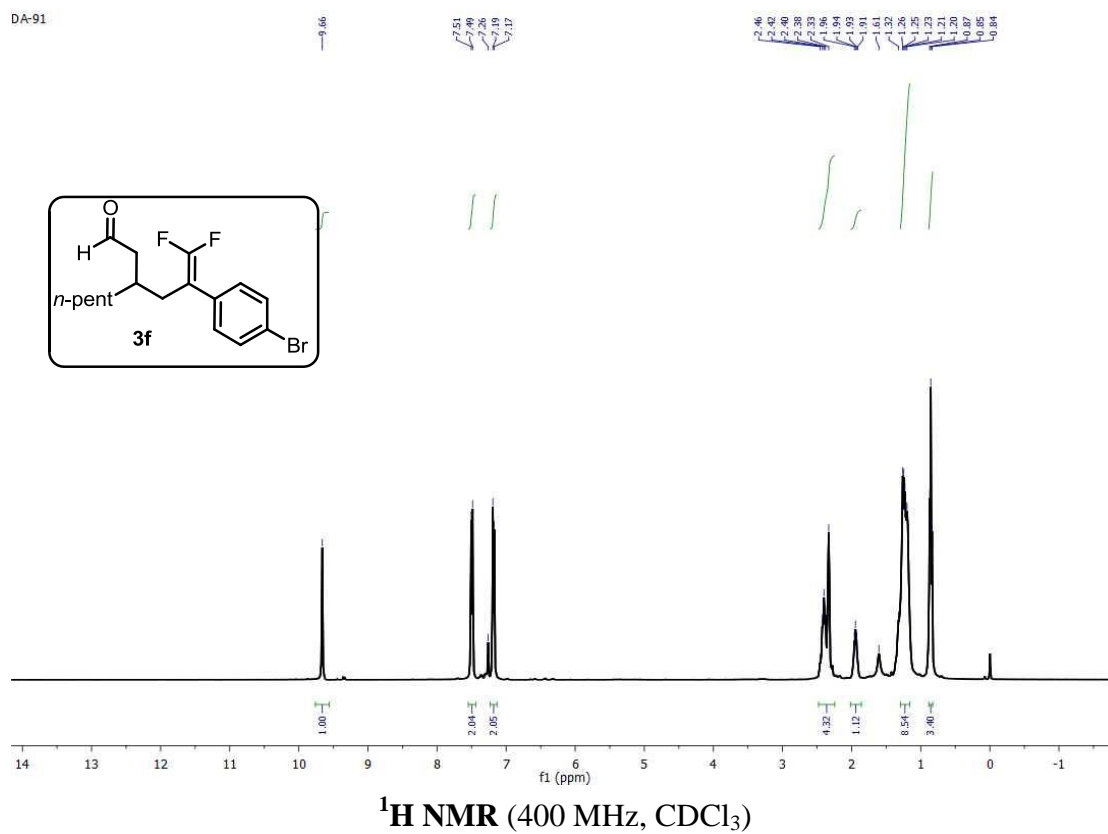



DA-92

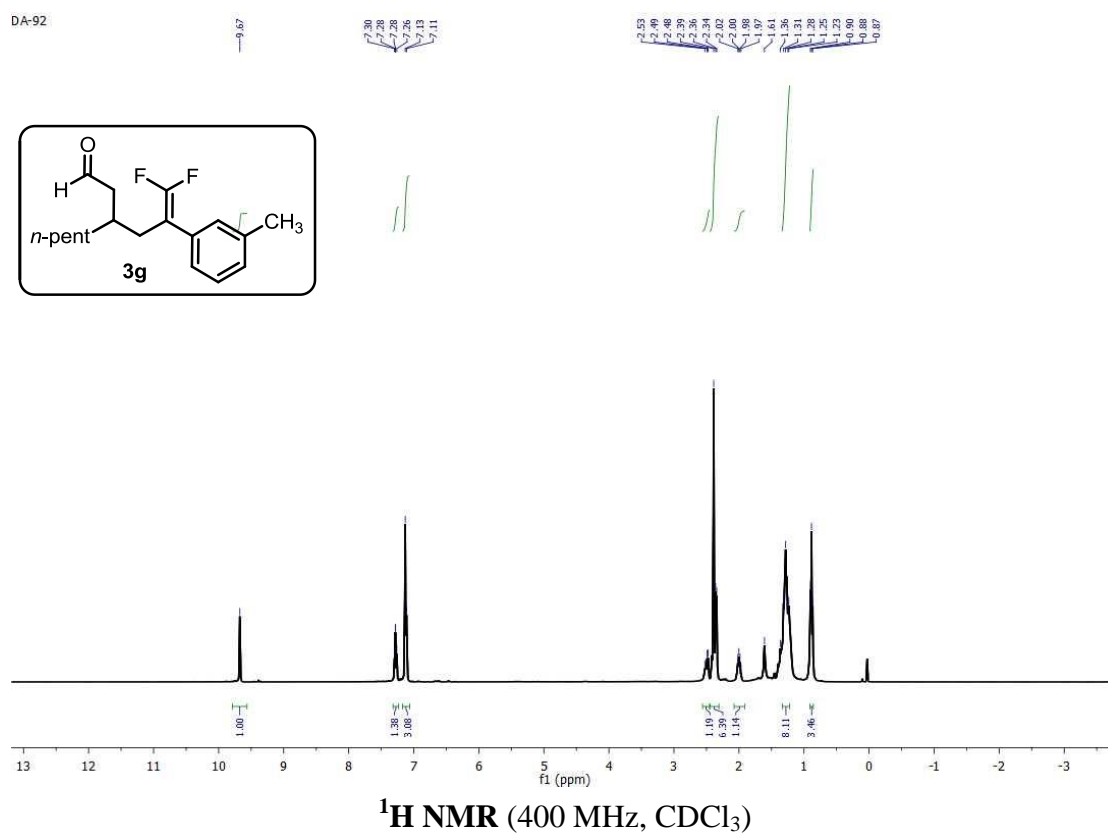

DA-92

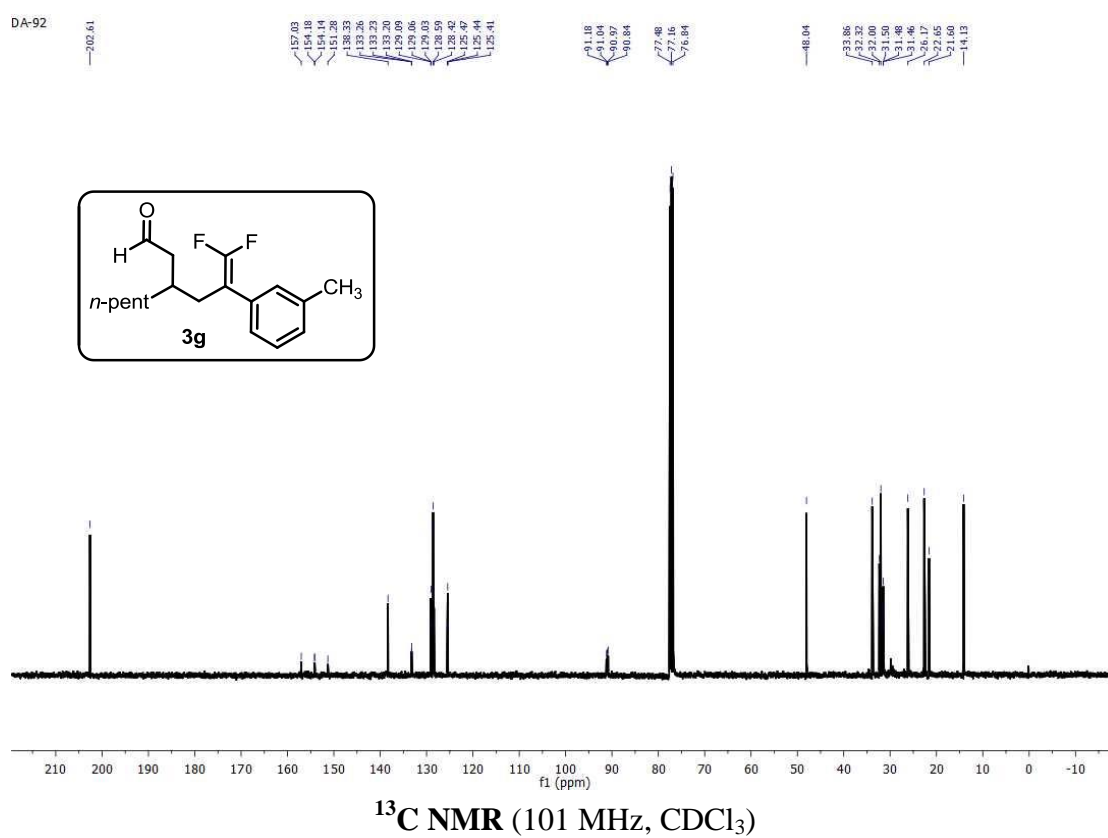

DA-92

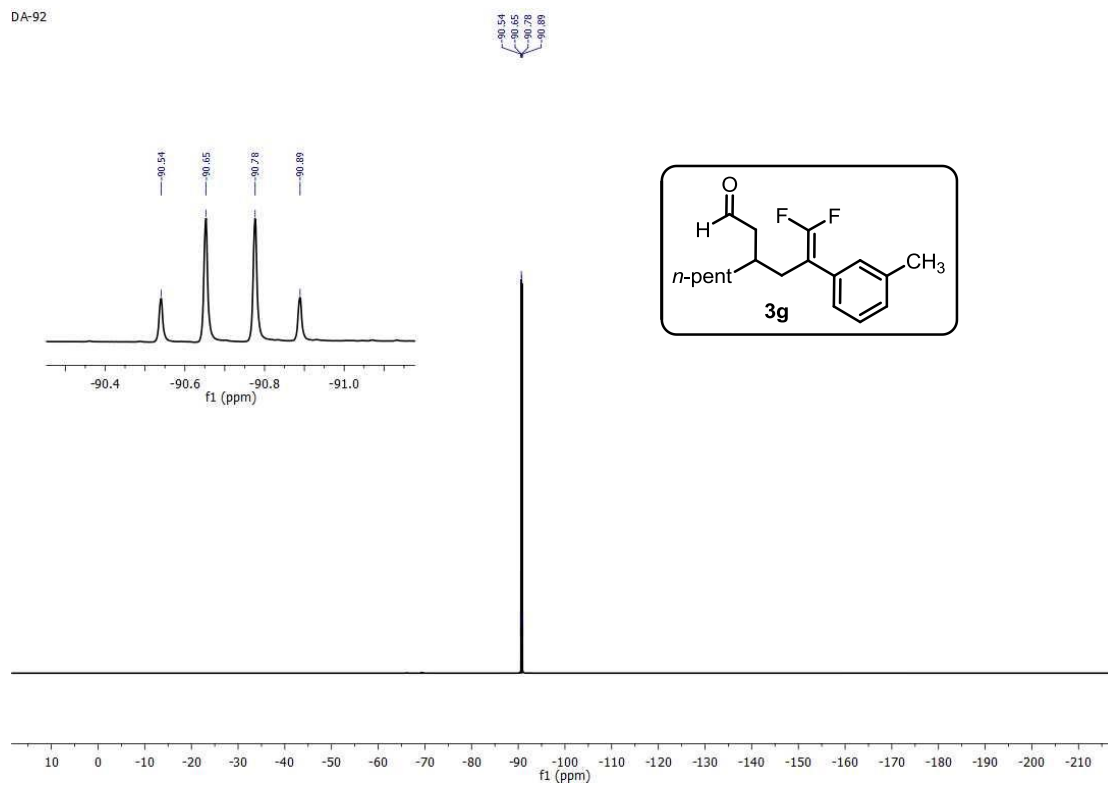 $^{19}\text{F}$  NMR (376 MHz,  $\text{CDCl}_3$ )

DA-97

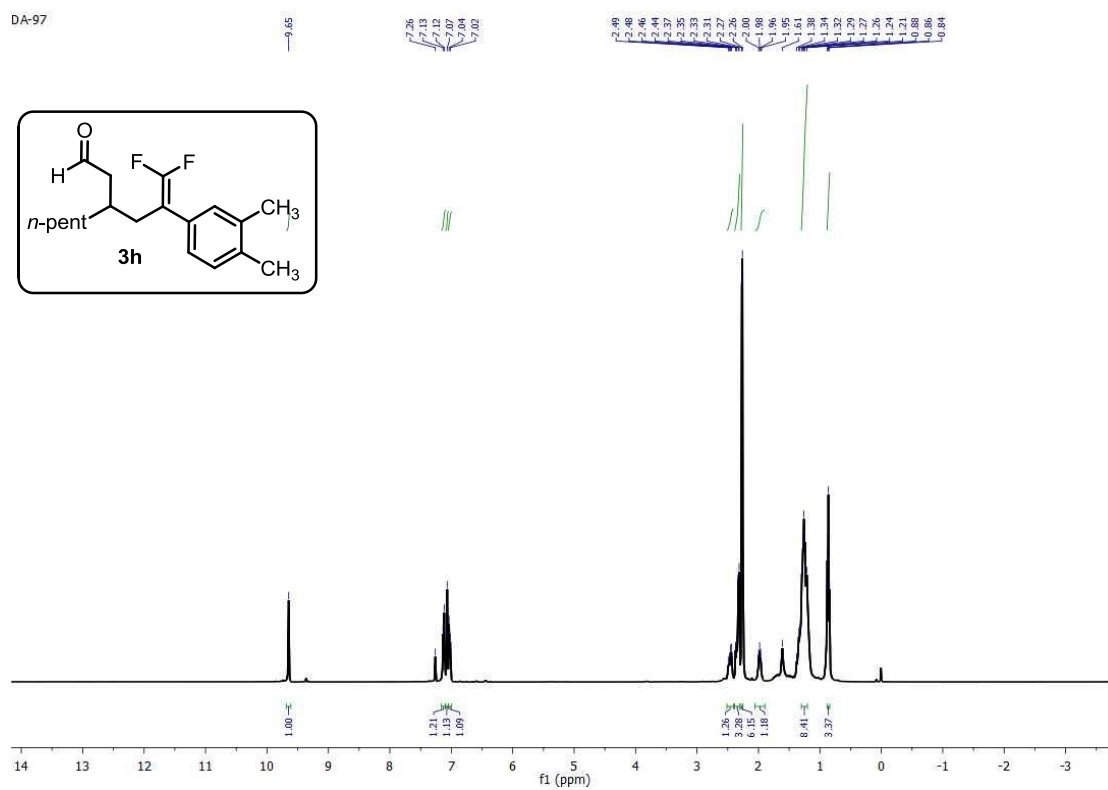 $^1\text{H}$  NMR (400 MHz,  $\text{CDCl}_3$ )



DA-97

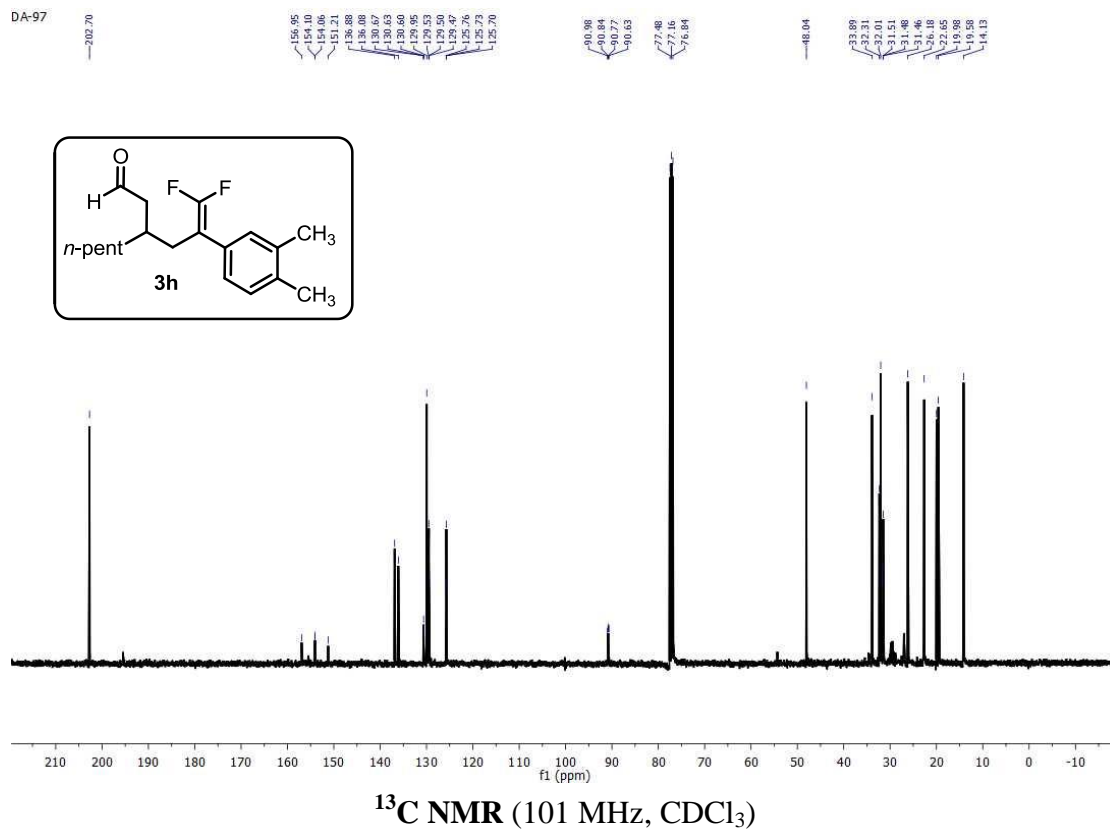

DA-97

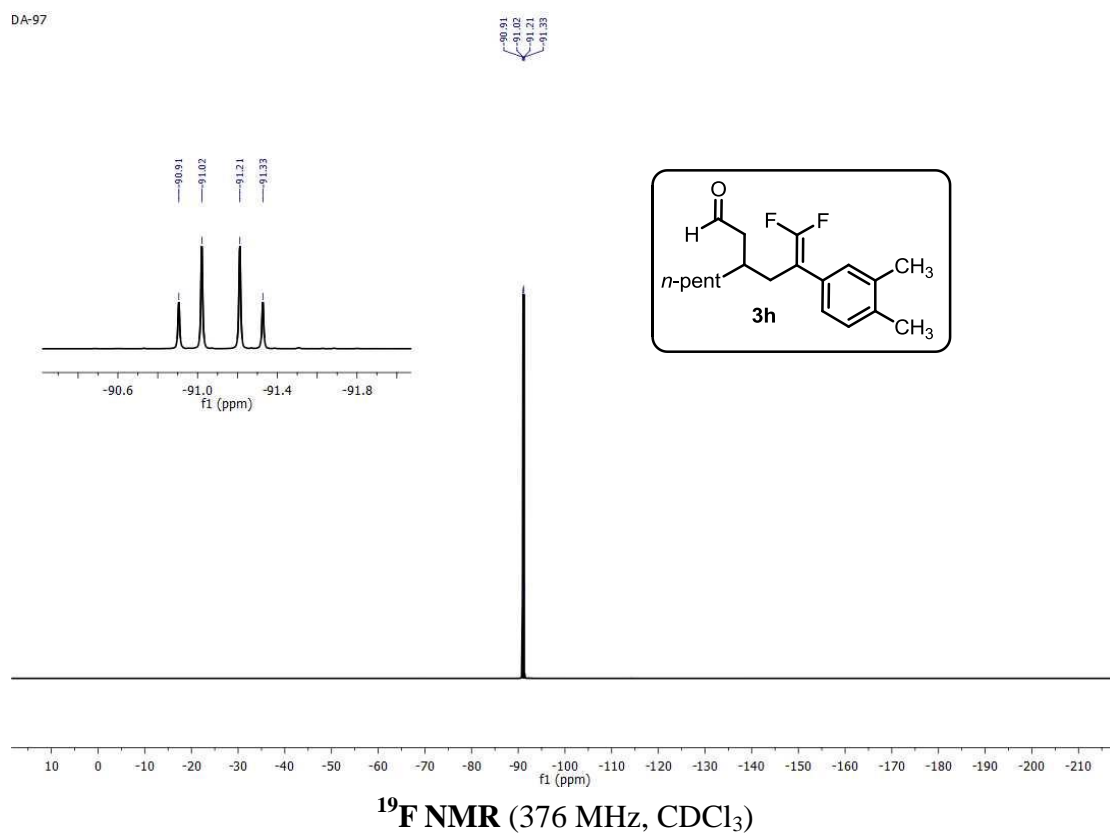

DA-82

PROTON CDCl<sub>3</sub> {E:\data2\Anand} Anand 37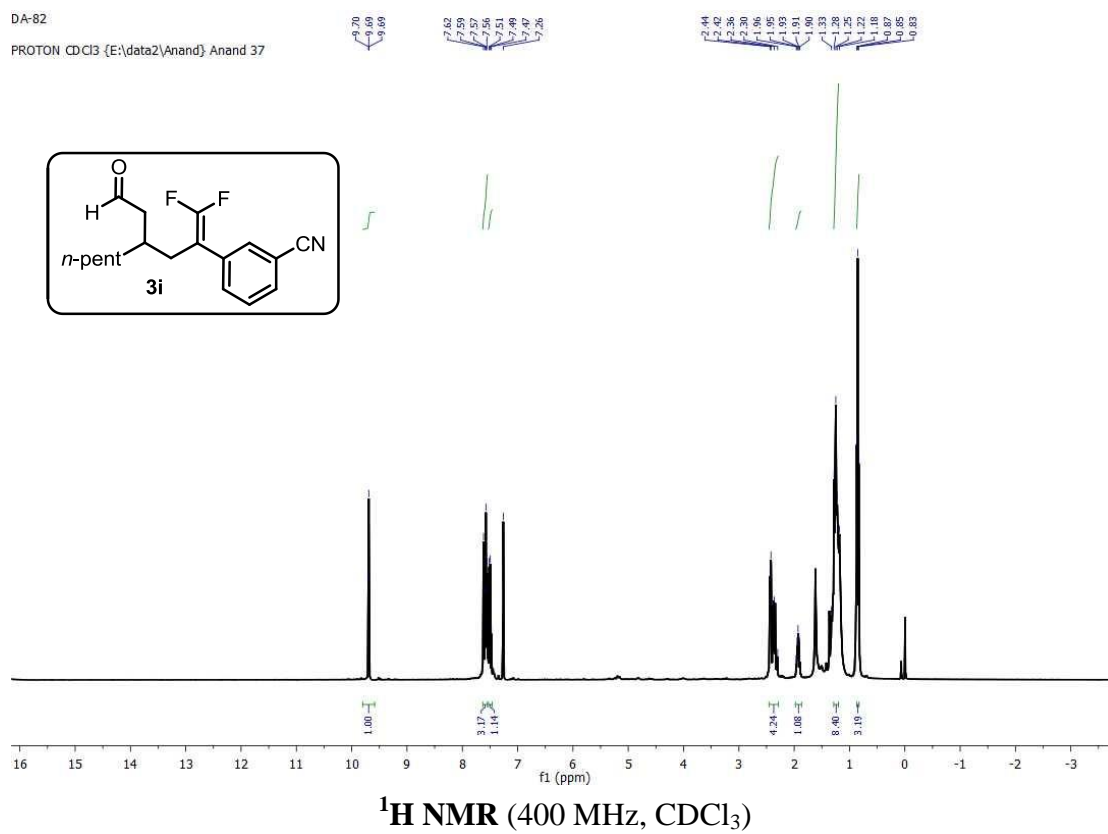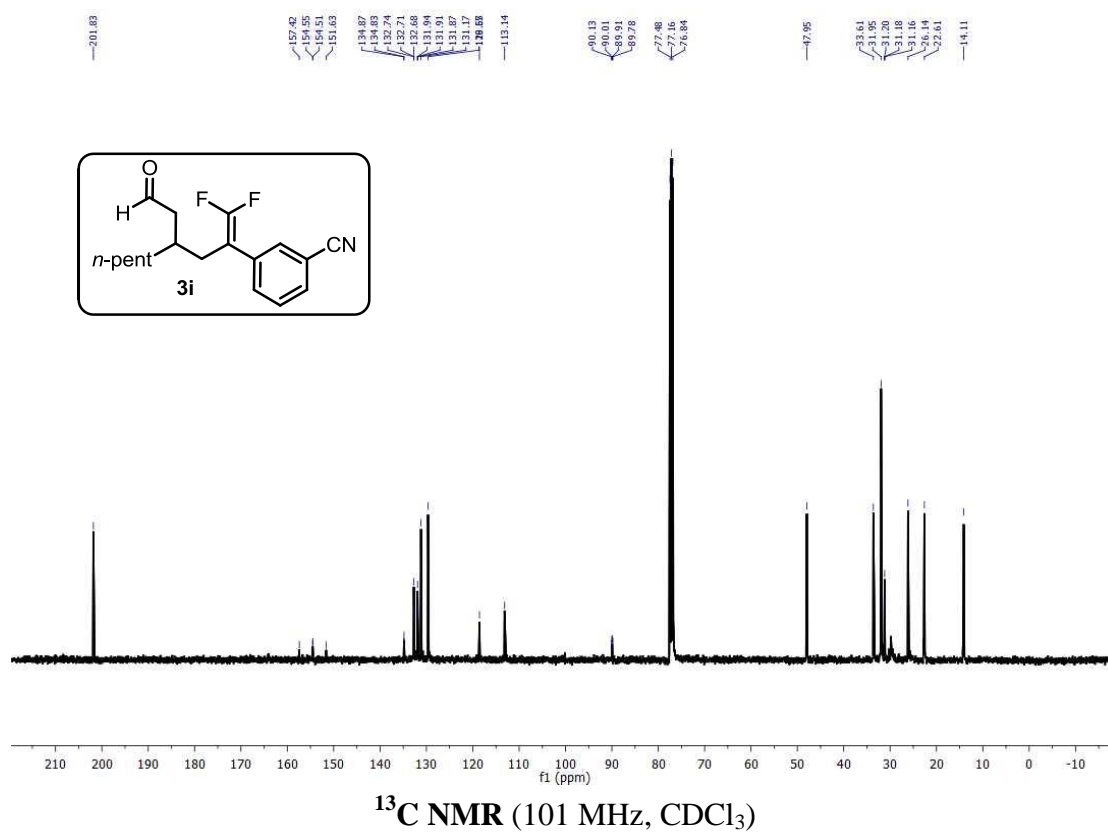

$\begin{array}{c} \text{---}87.83 \\ \text{---}87.91 \\ \text{---}88.41 \\ \text{---}88.49 \end{array}$

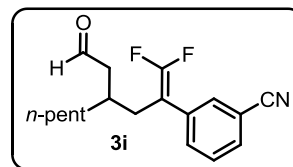

DA-96

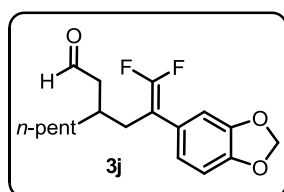<sup>1</sup>H NMR (400 MHz, CDCl<sub>3</sub>)

DA-96

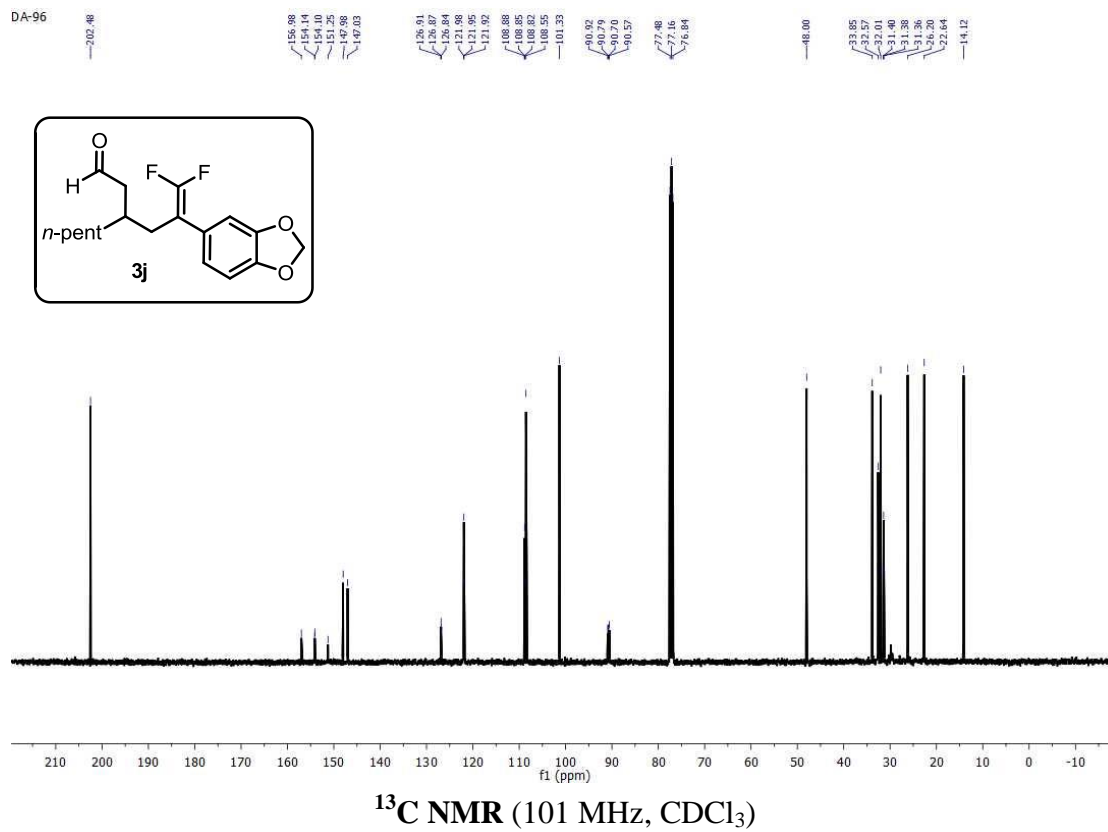

DA-96

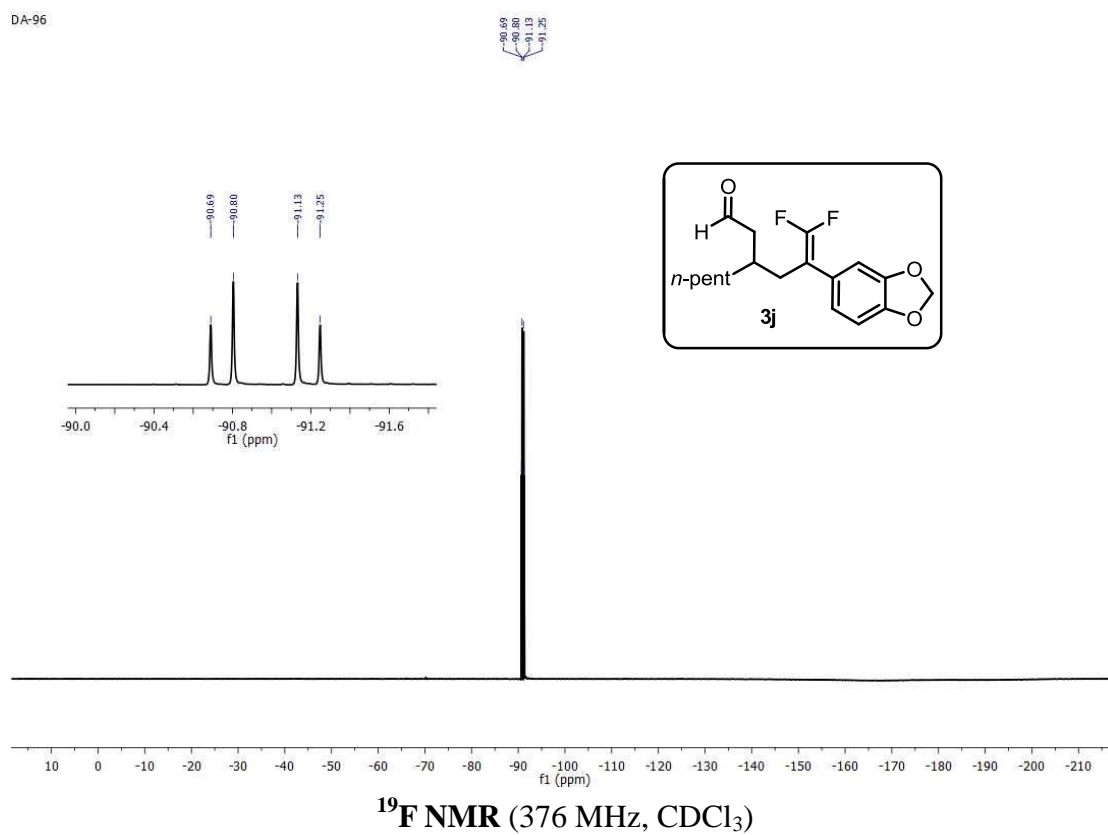

DA-94

PROTON CDCl<sub>3</sub> {E:\data2\Anand} Anand 31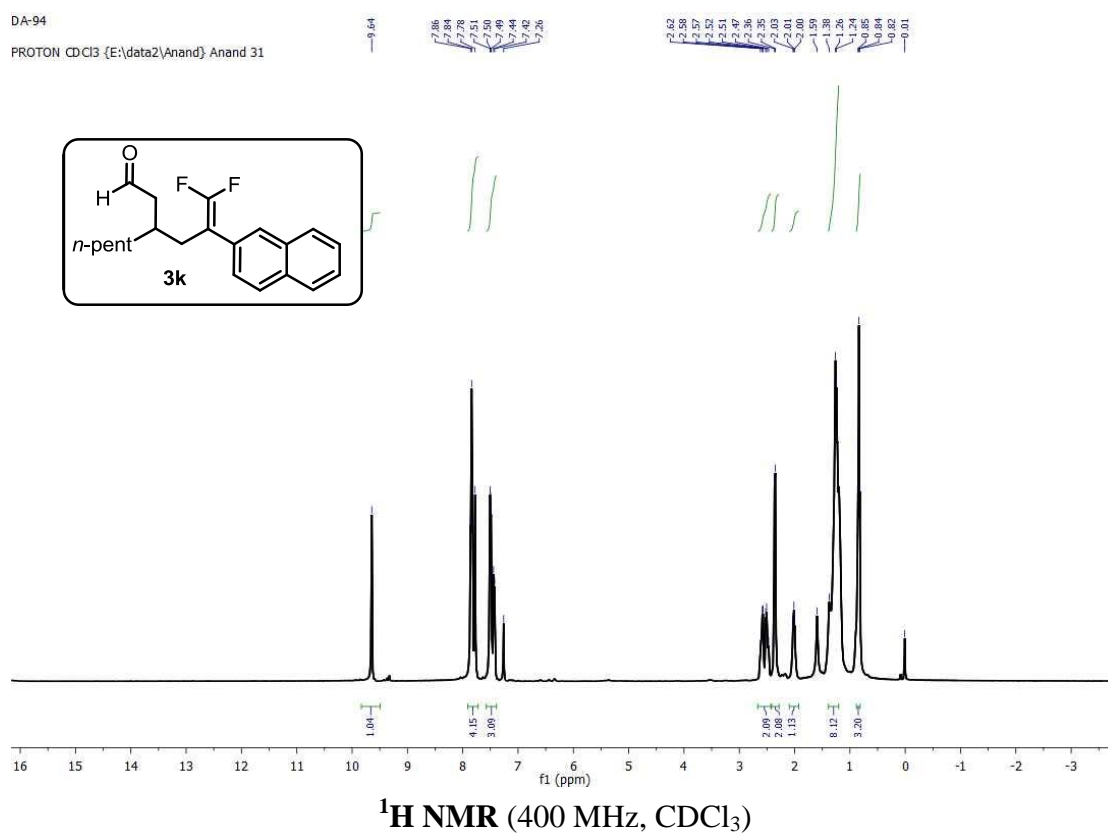

DA-94

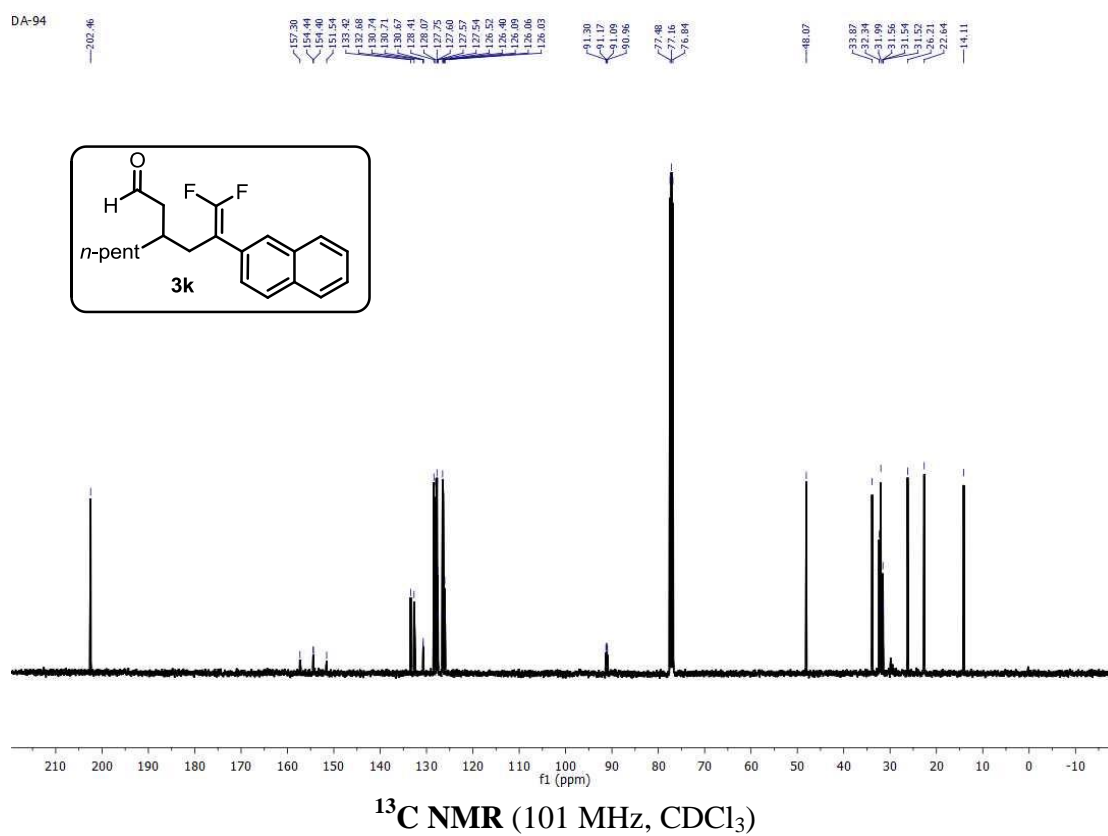

DA-94

F19CPD CDCl<sub>3</sub> (E:\data2\Anand) Anand 31

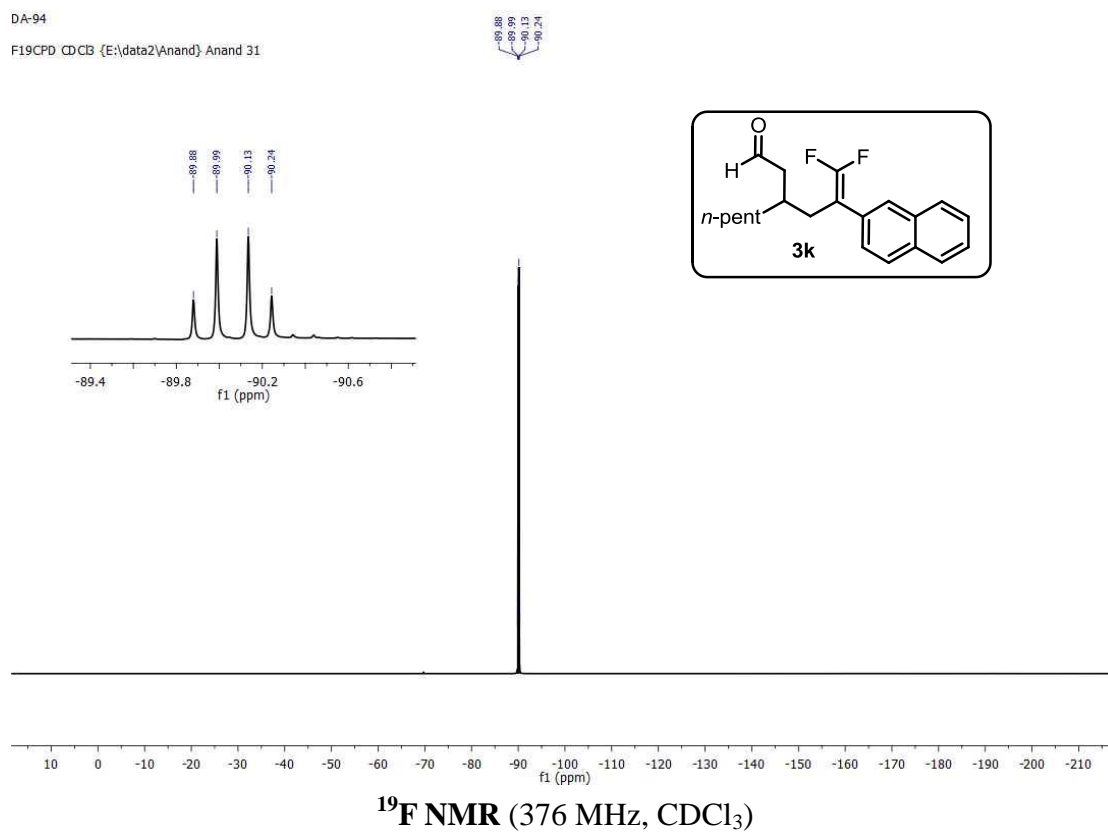

DA-95

PROTON CDCl<sub>3</sub> (E:\data2\Anand) Anand 32

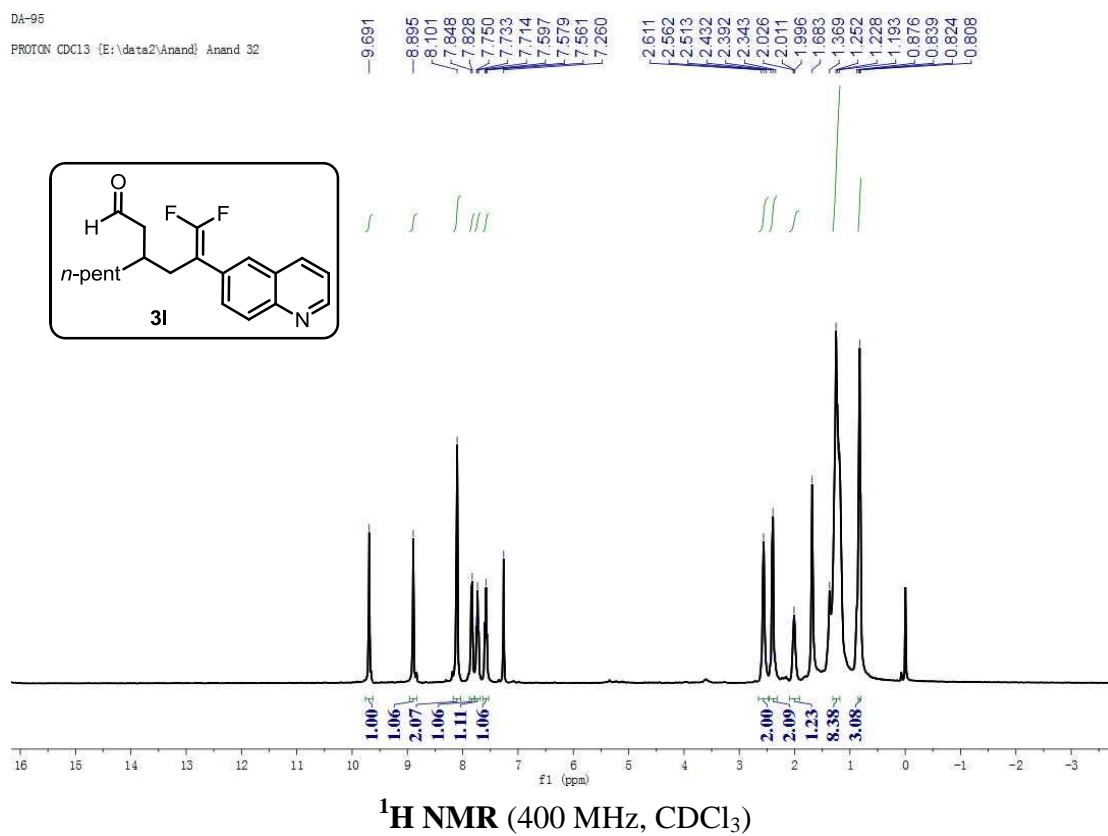

DA-95

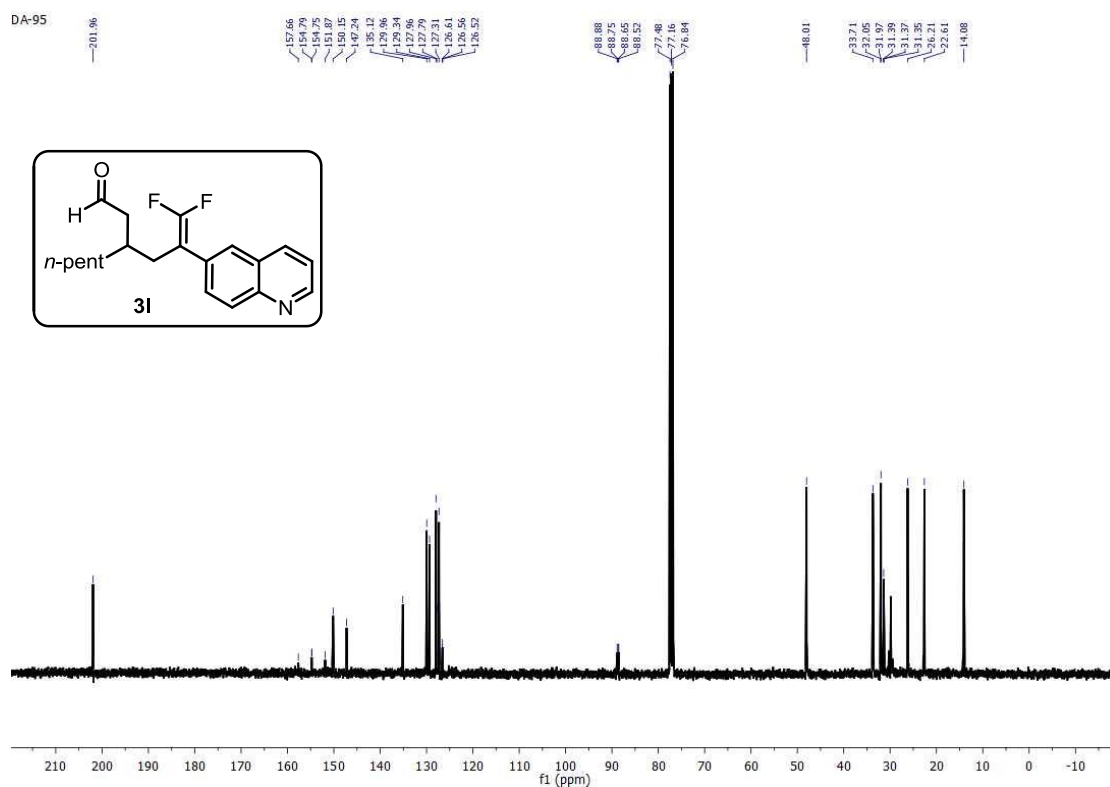<sup>13</sup>C NMR (101 MHz, CDCl<sub>3</sub>)

DA-95

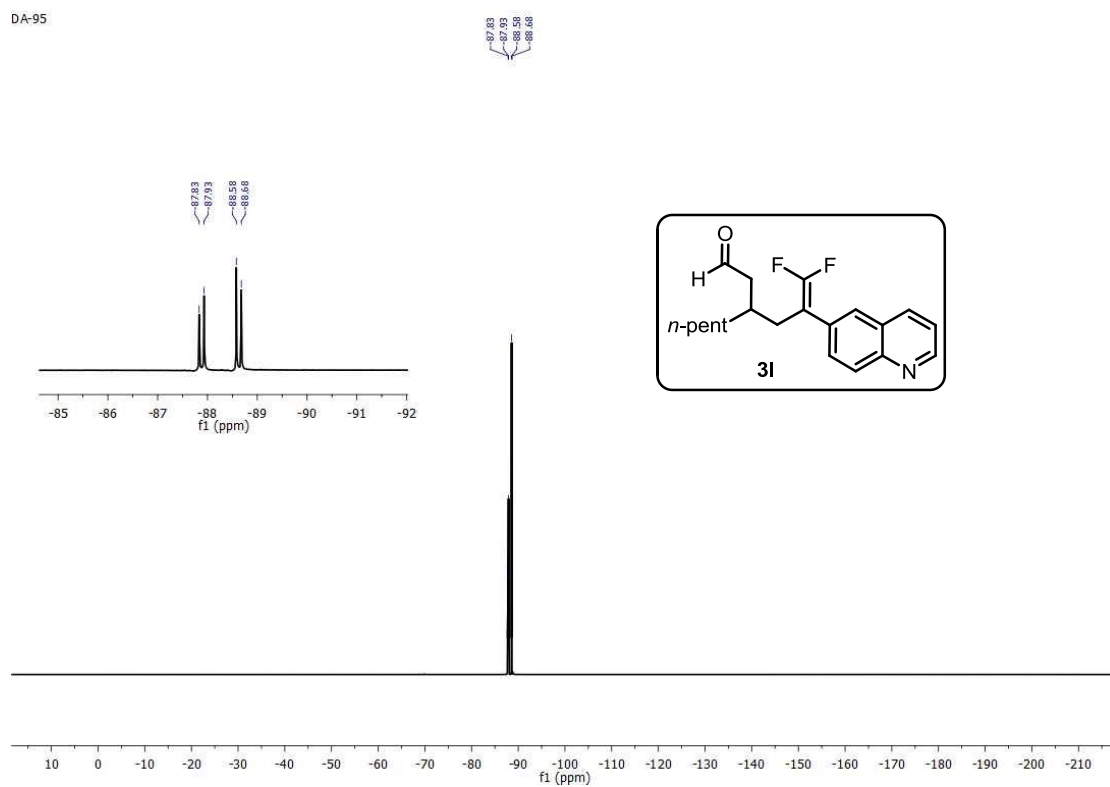<sup>19</sup>F NMR (376 MHz, CDCl<sub>3</sub>)

DA-45

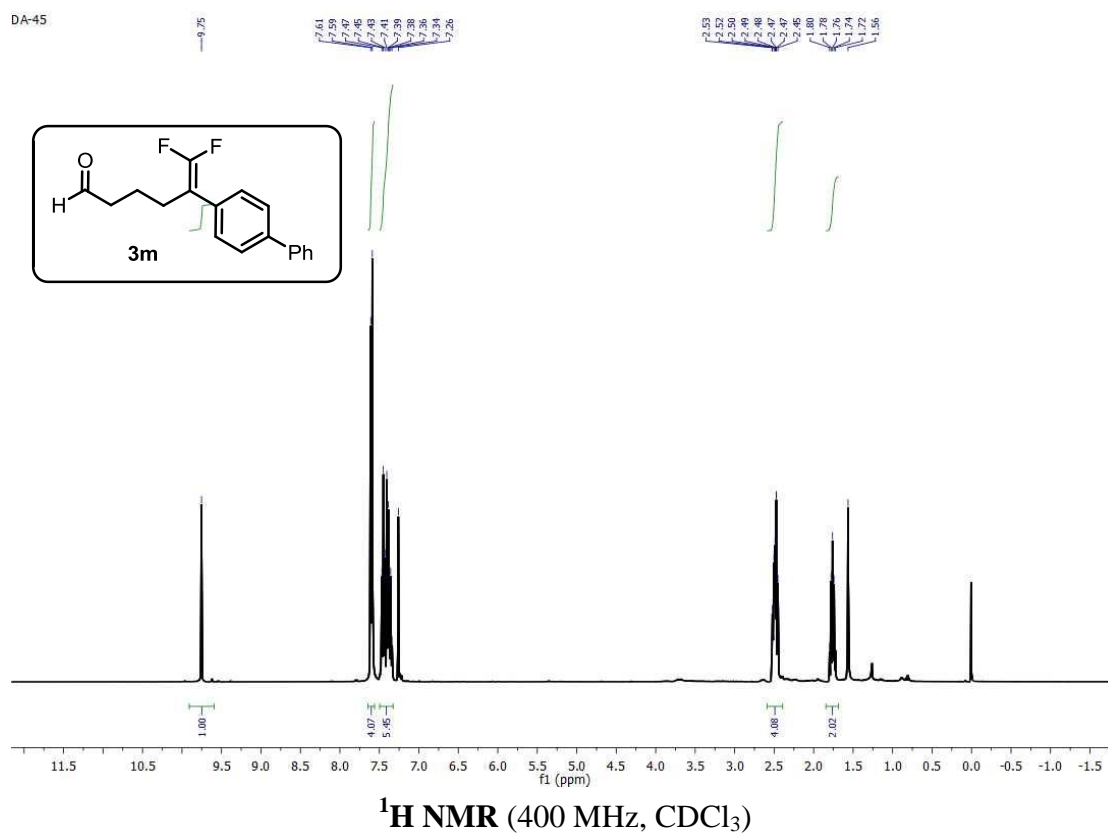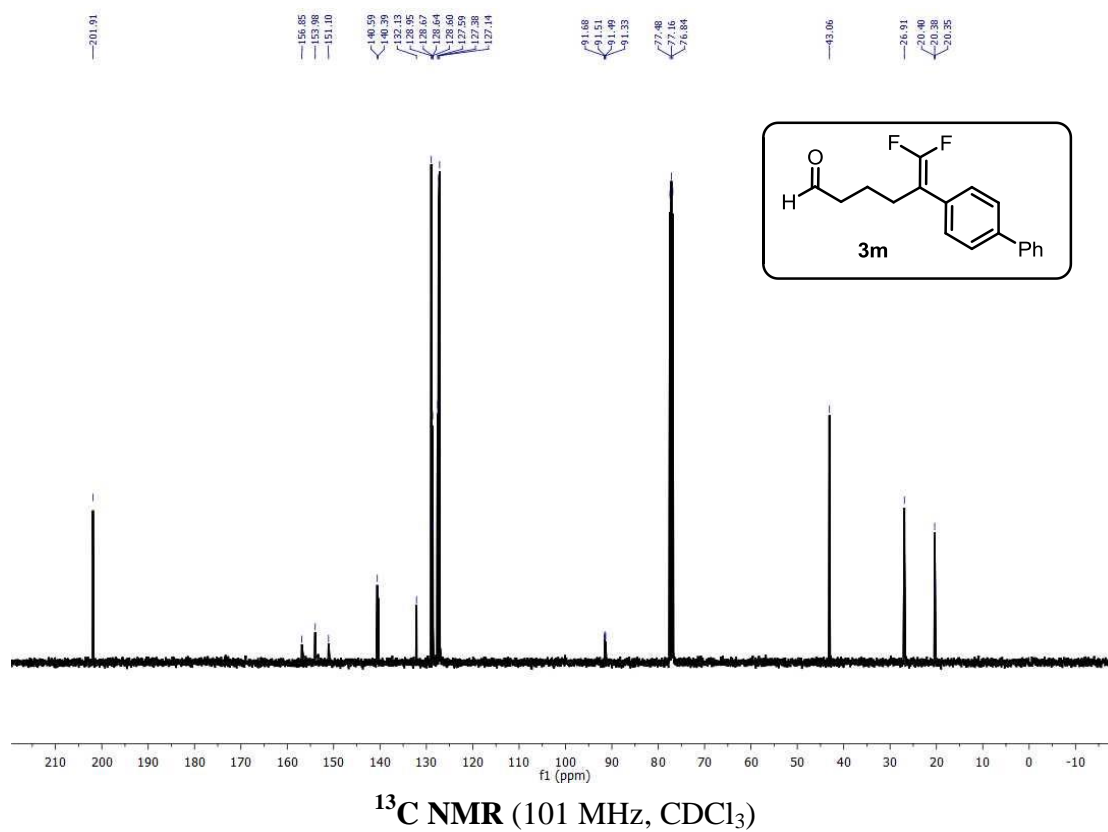



DA-45

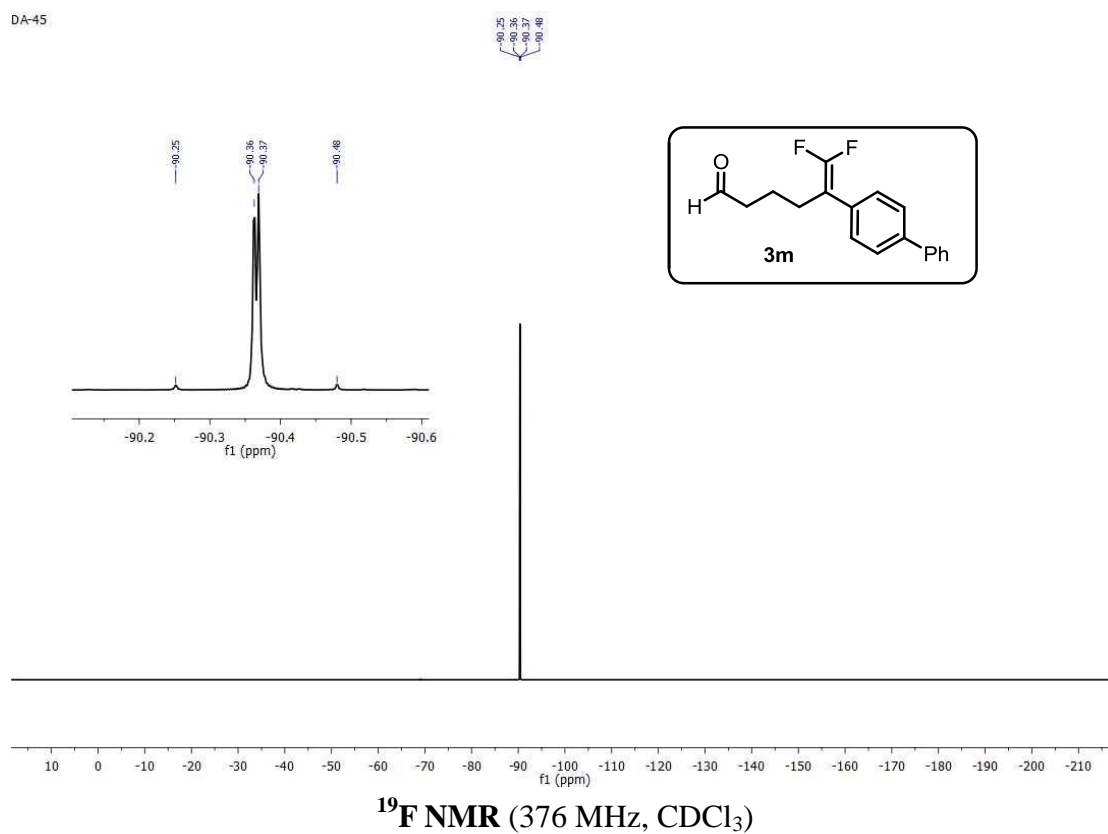

DA-83

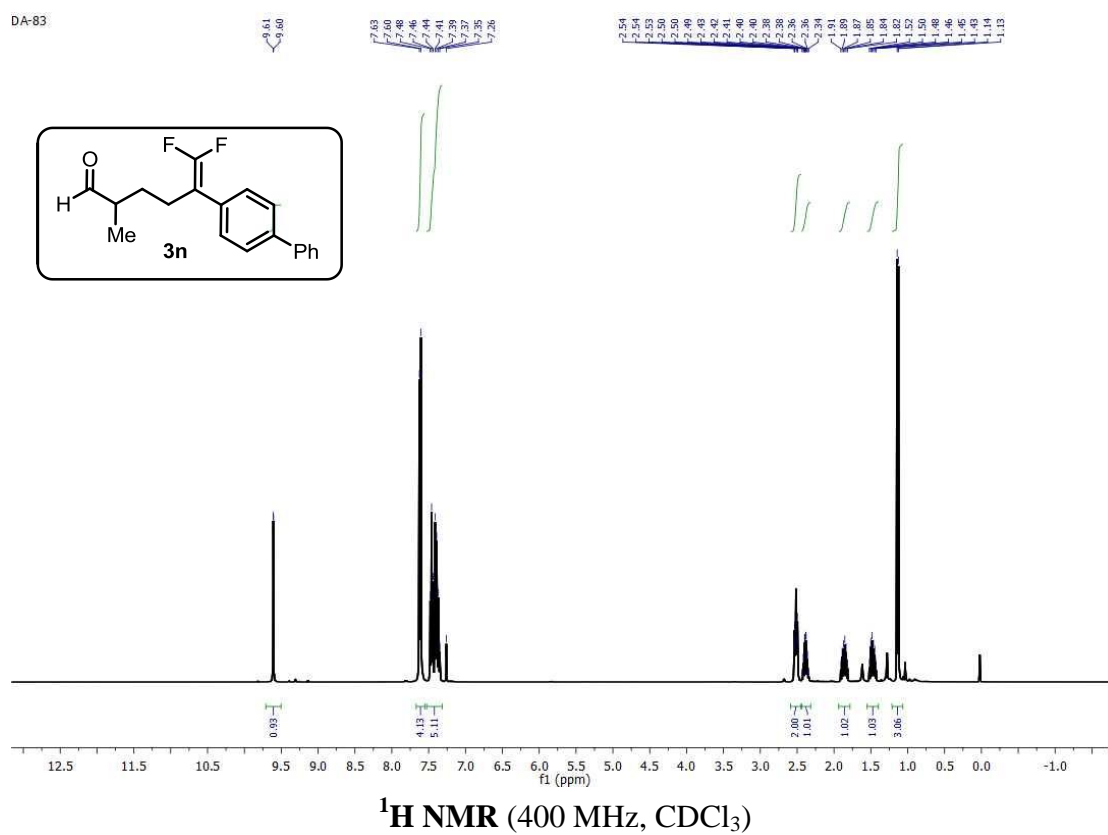

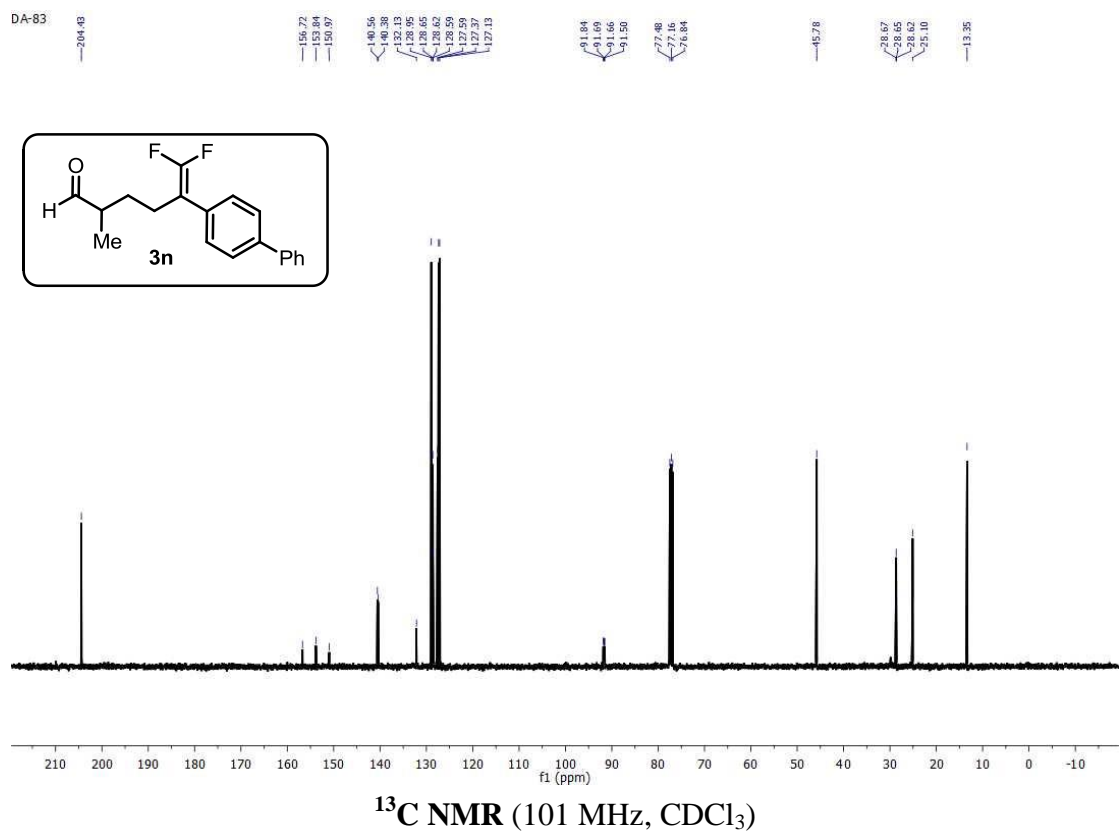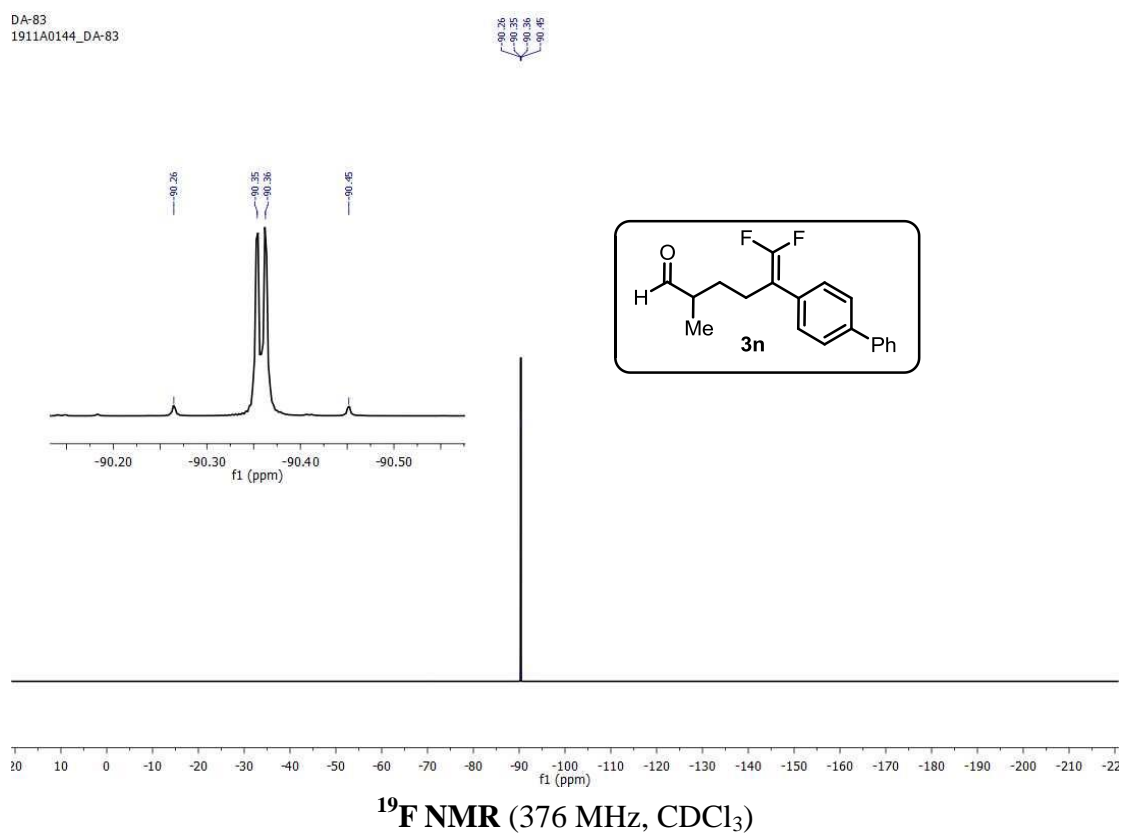

DA-71

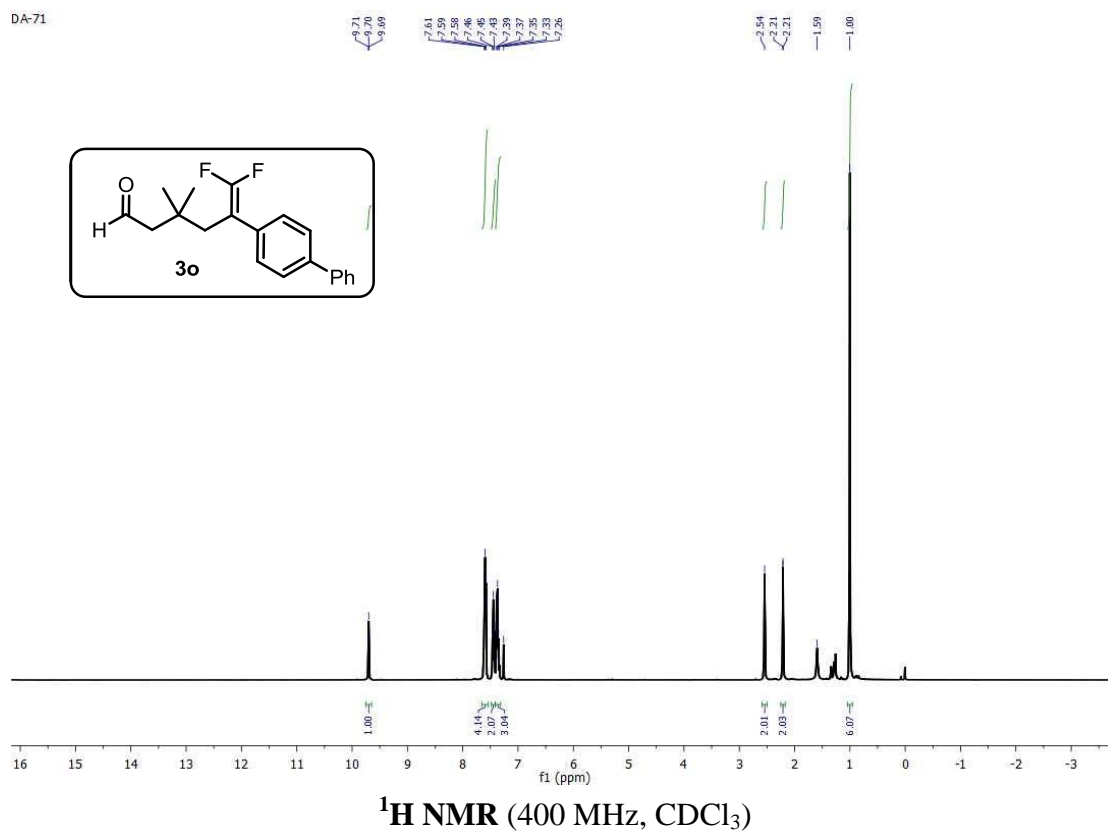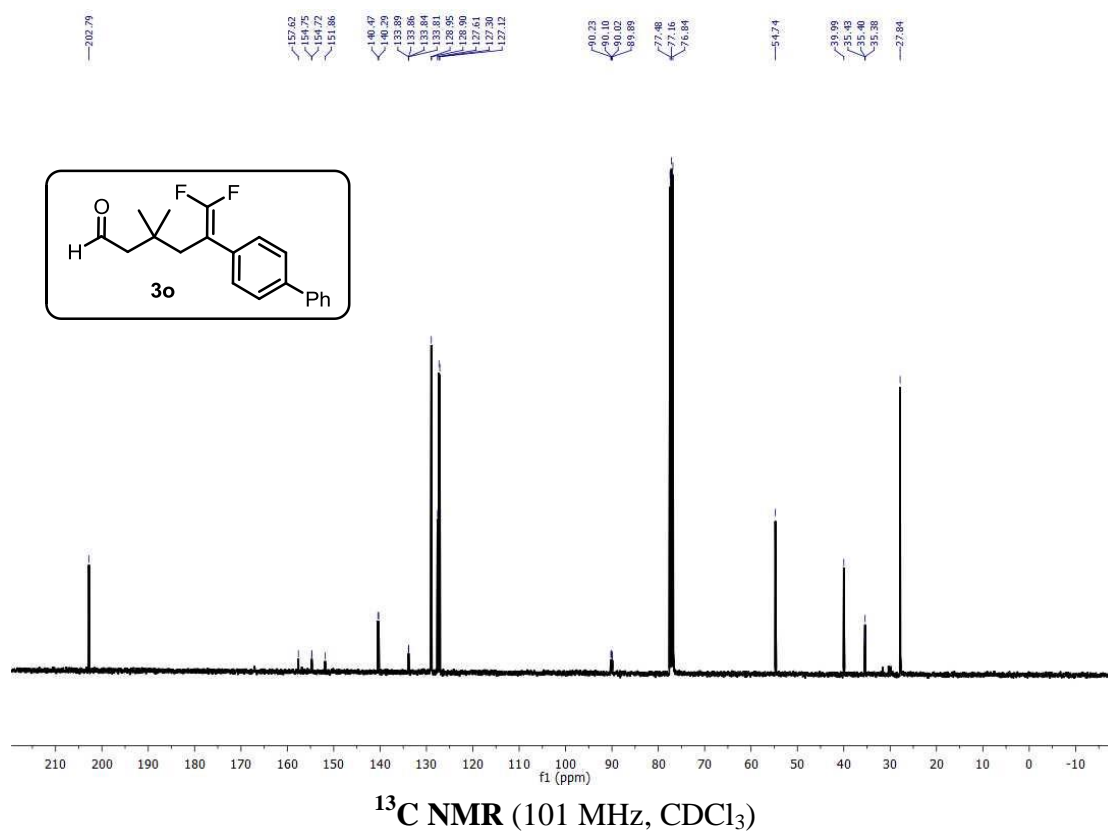

DA-71

F19CPD CDCl<sub>3</sub> (E:\data2\Anand) Anand 12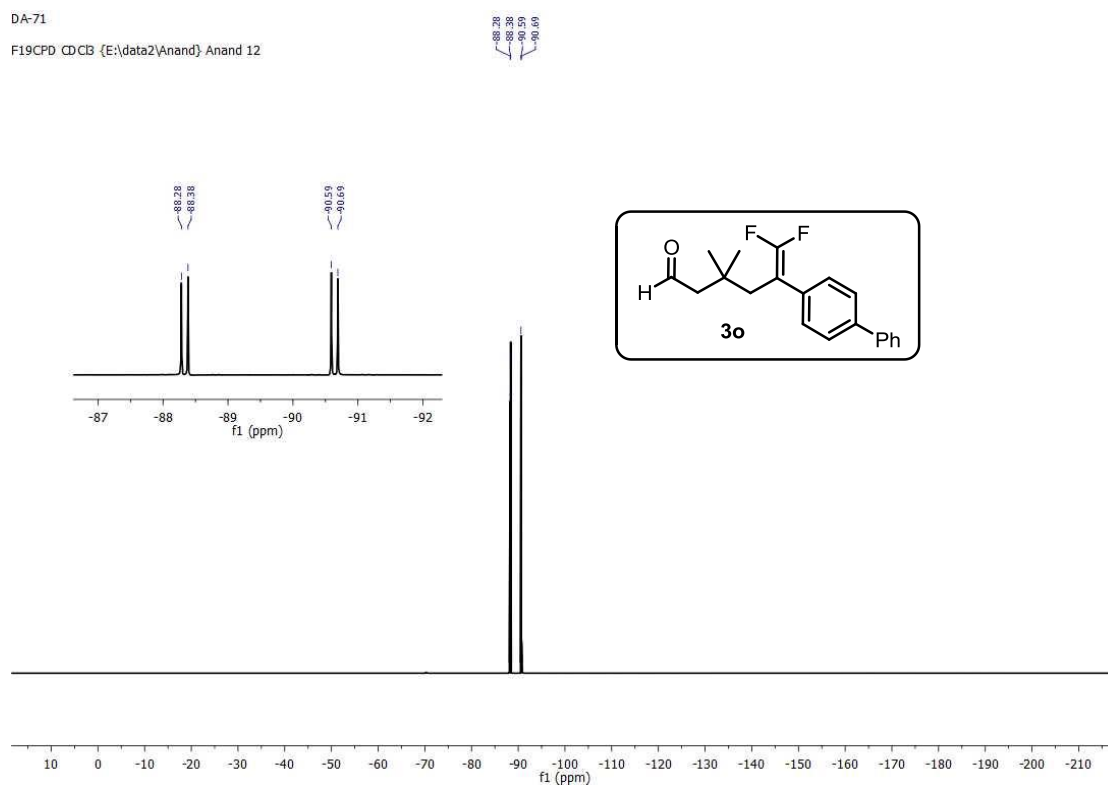

**<sup>19</sup>F NMR (376 MHz, CDCl<sub>3</sub>)**

DA-111

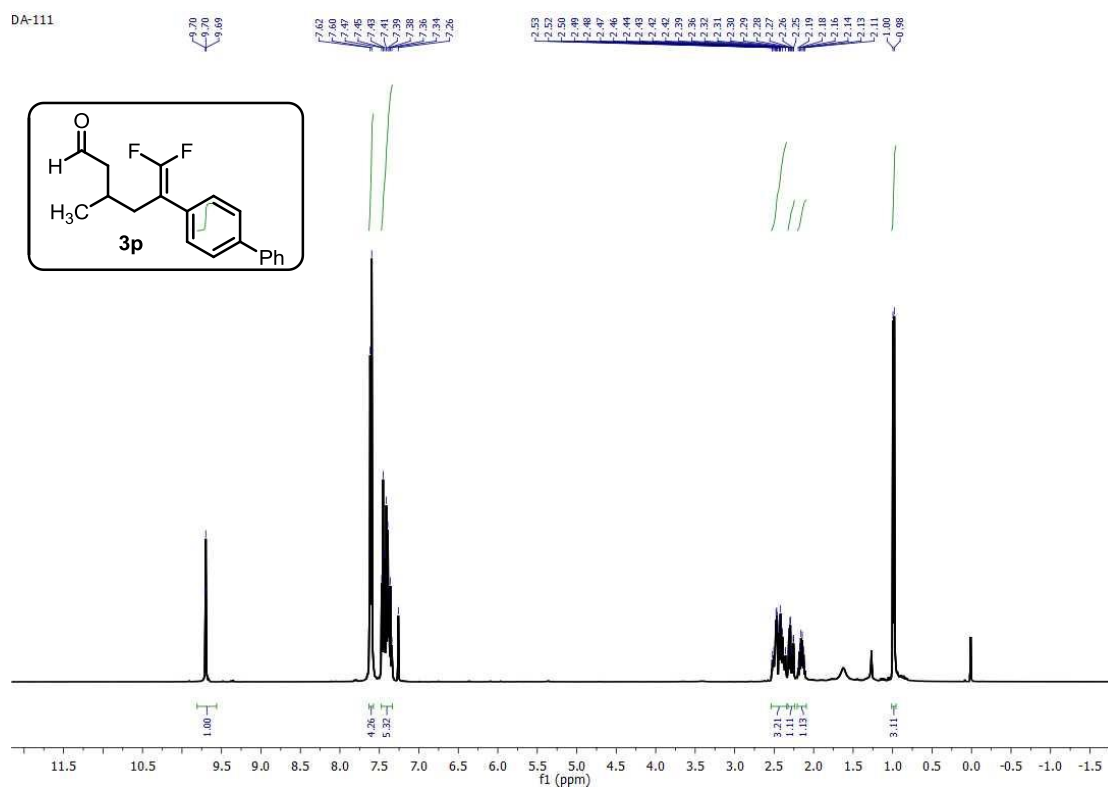

**<sup>1</sup>H NMR (400 MHz, CDCl<sub>3</sub>)**

DA-111

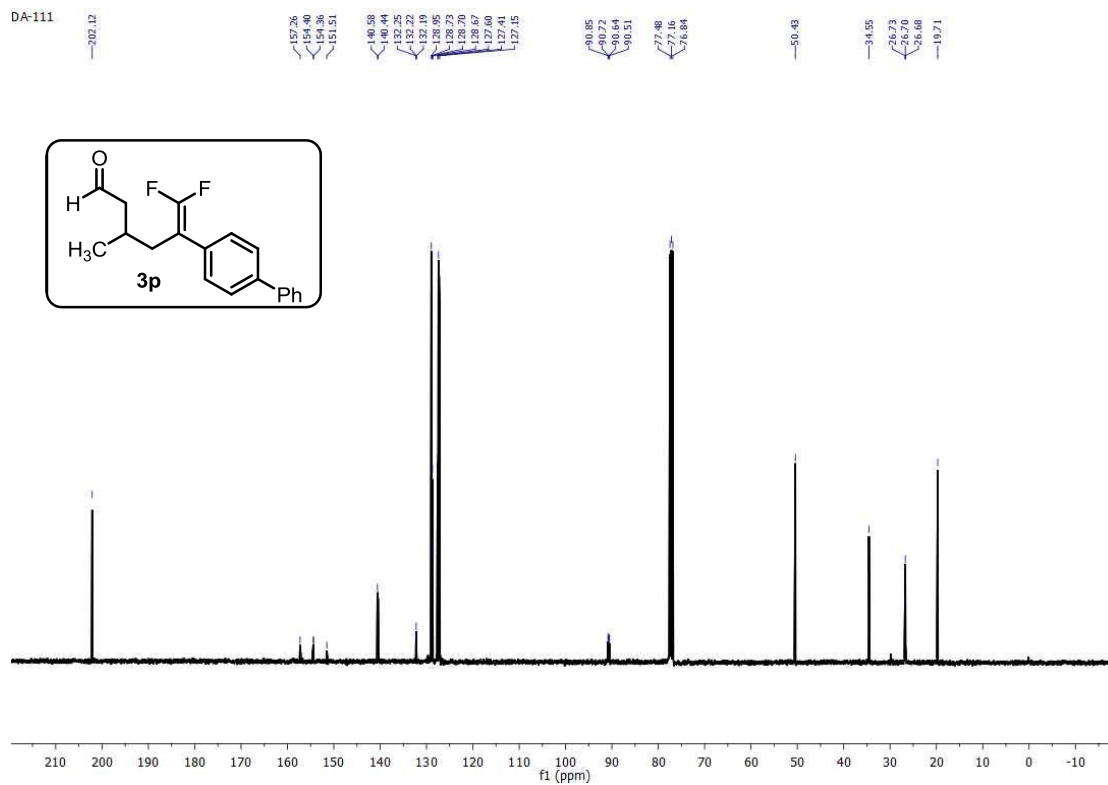

DA-111

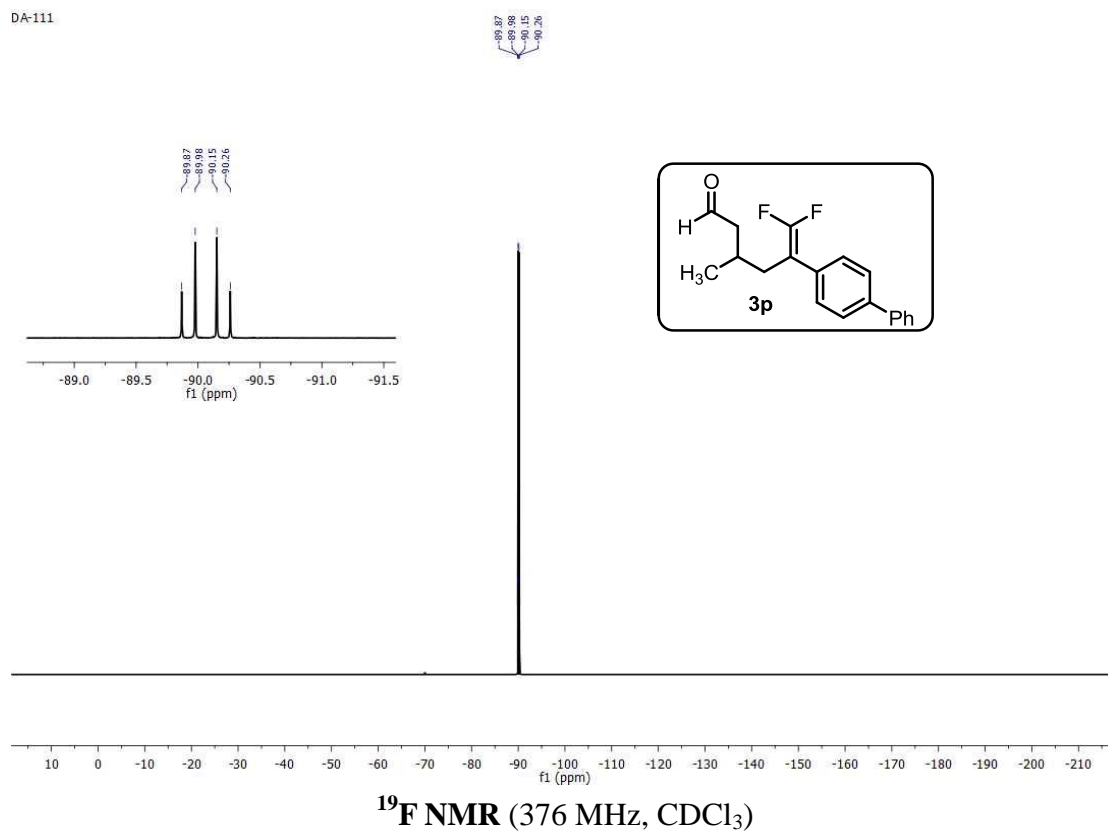

DA-3282

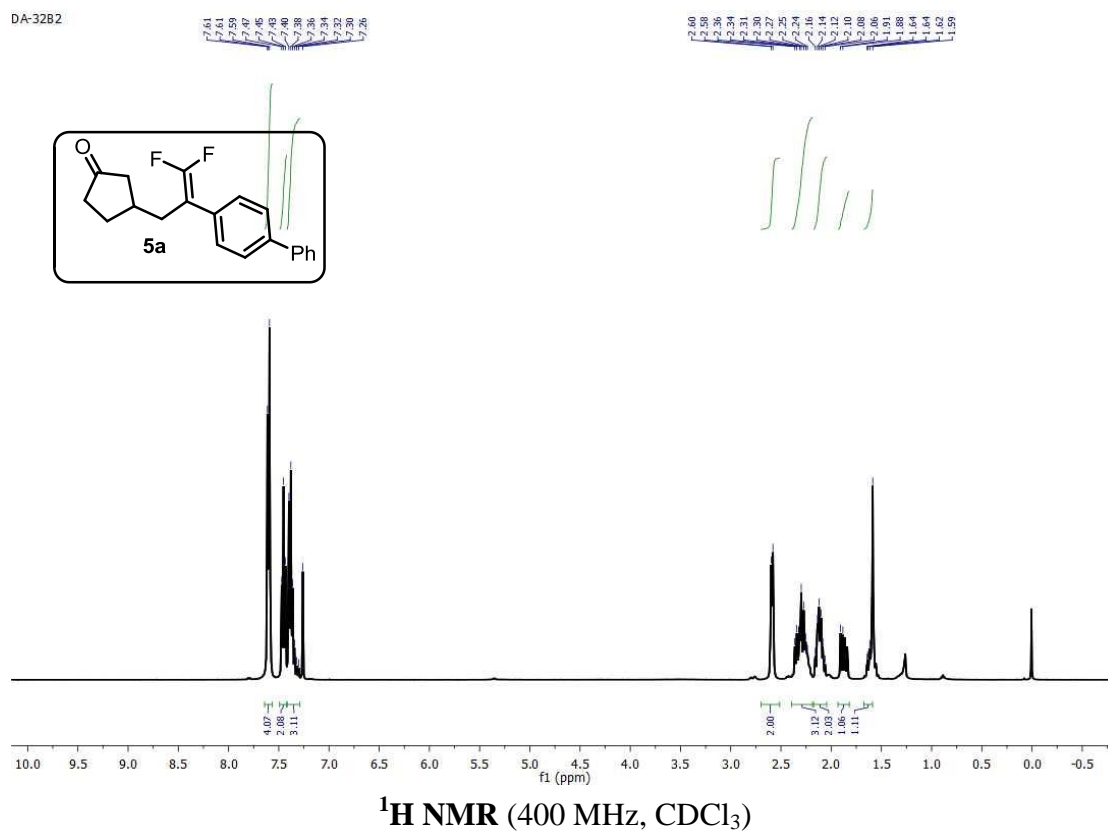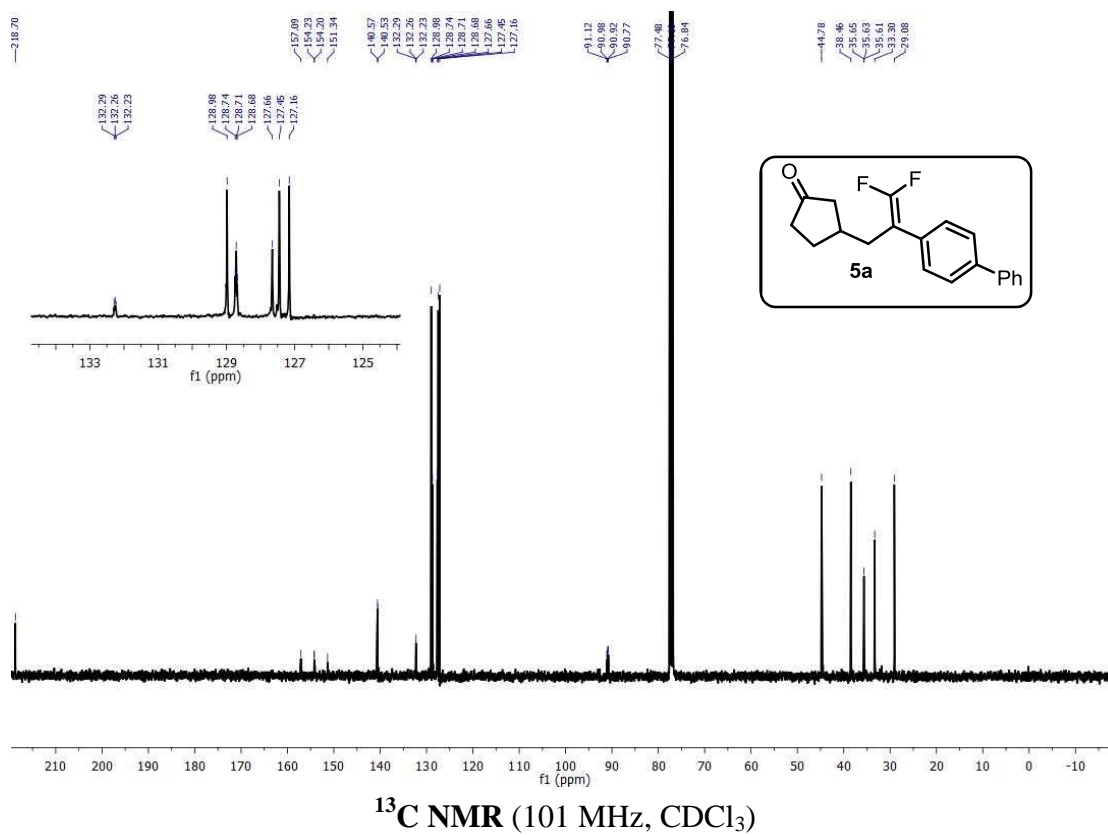

DA-32B2

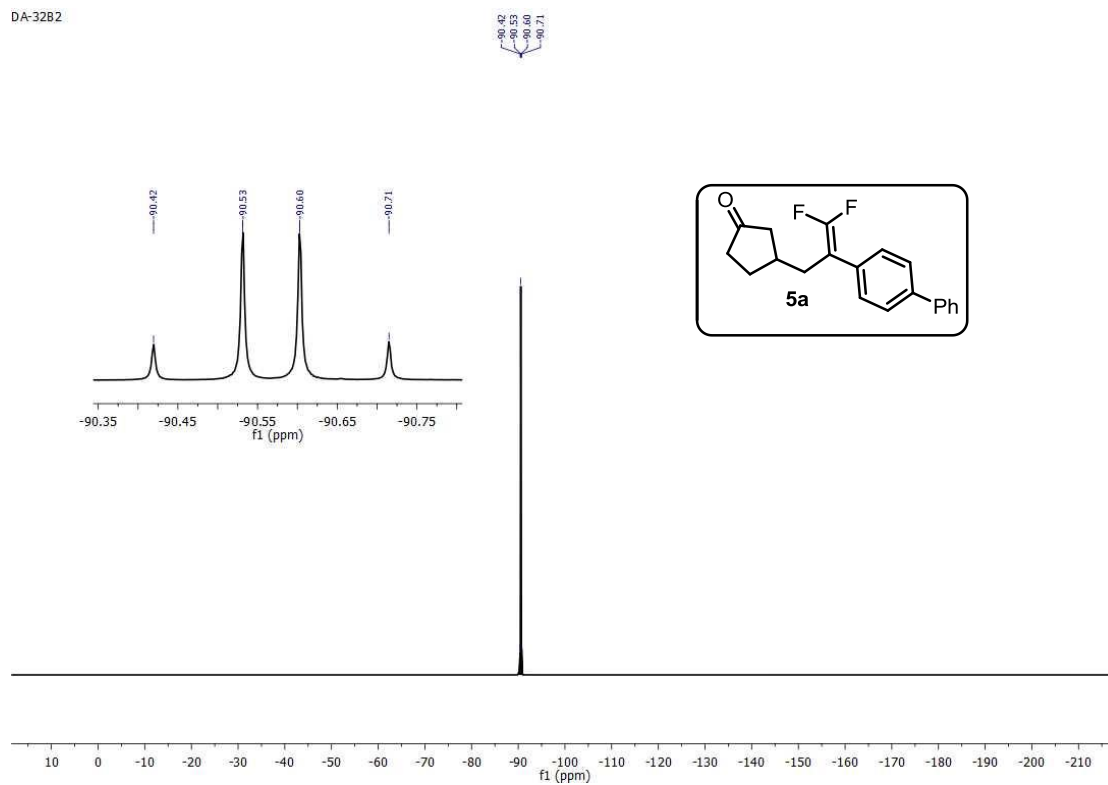

DA-36A

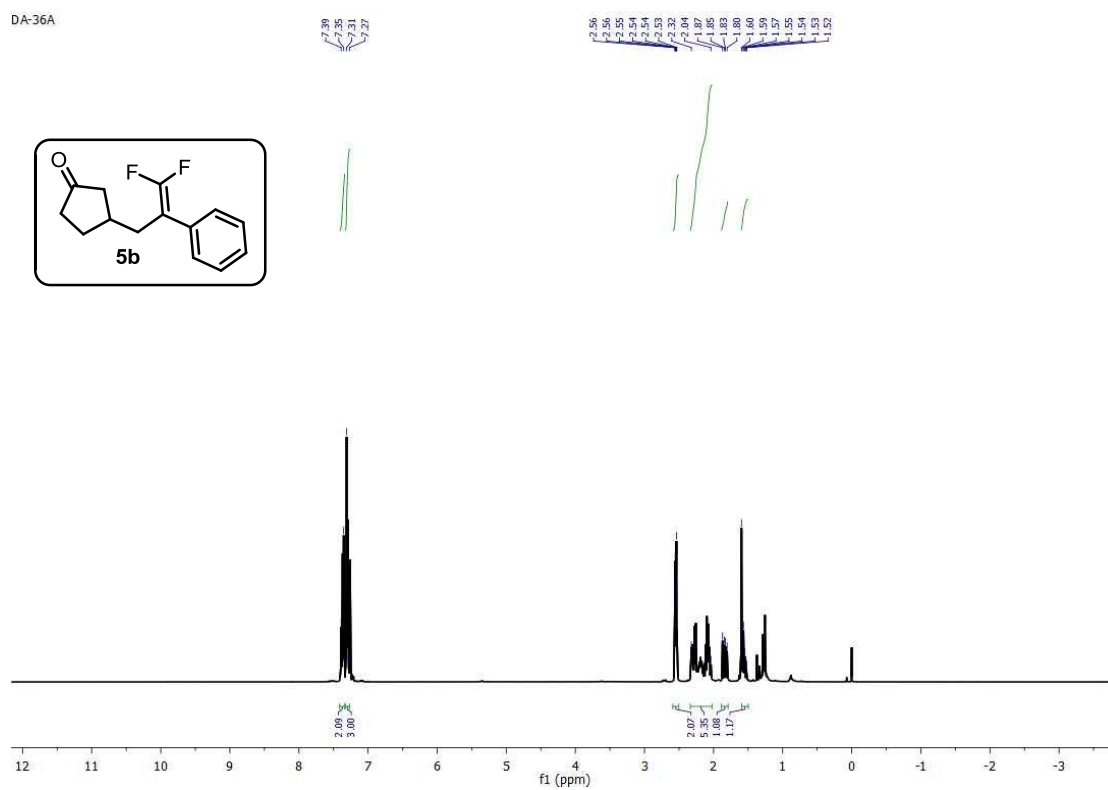

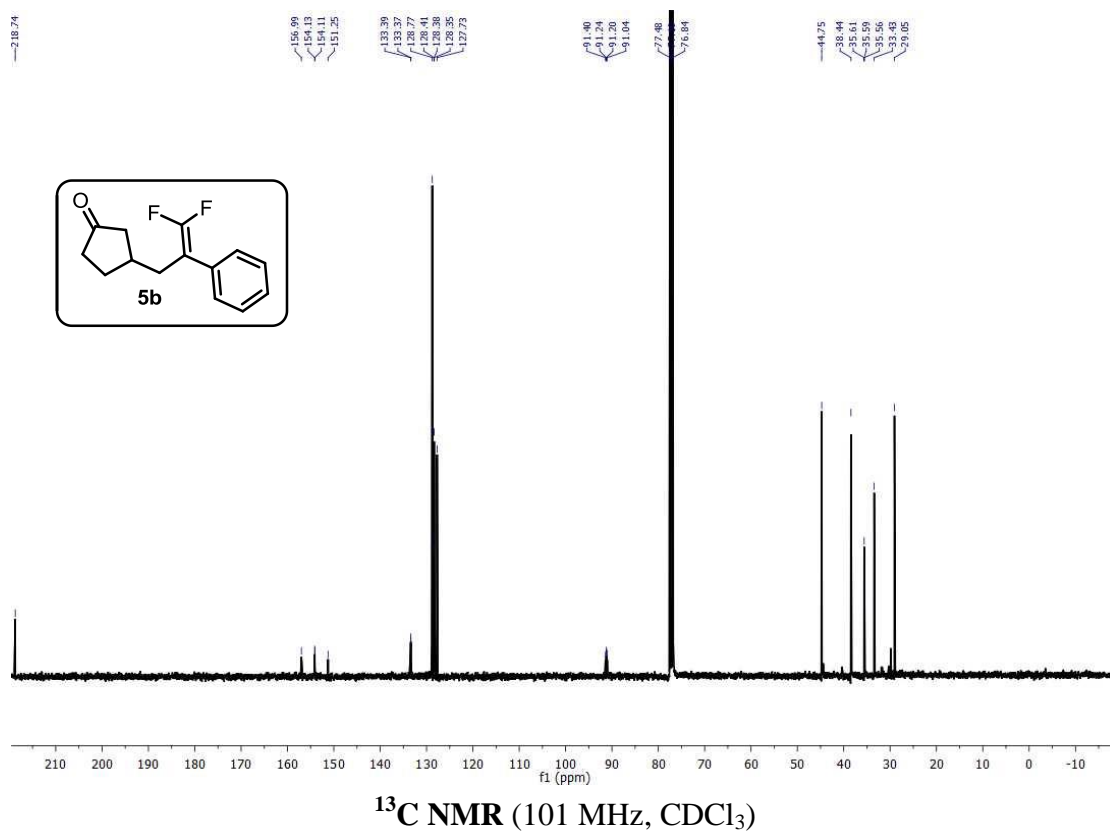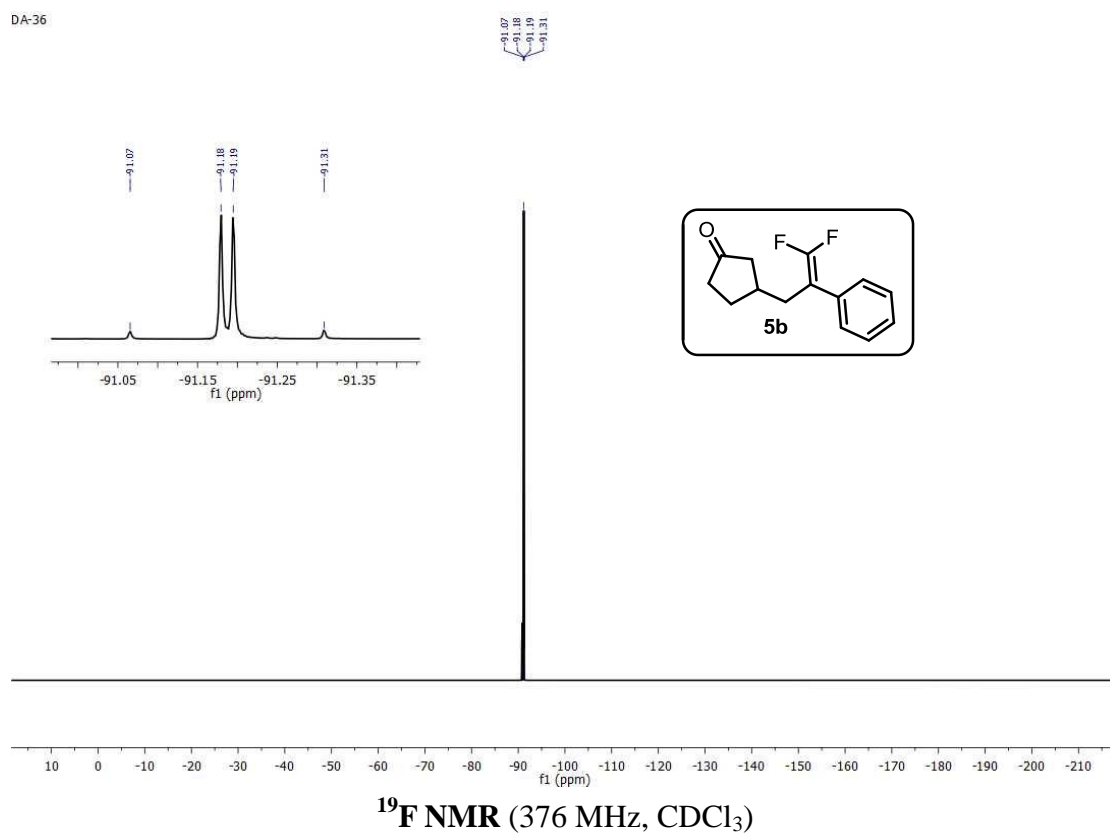



DA-126A

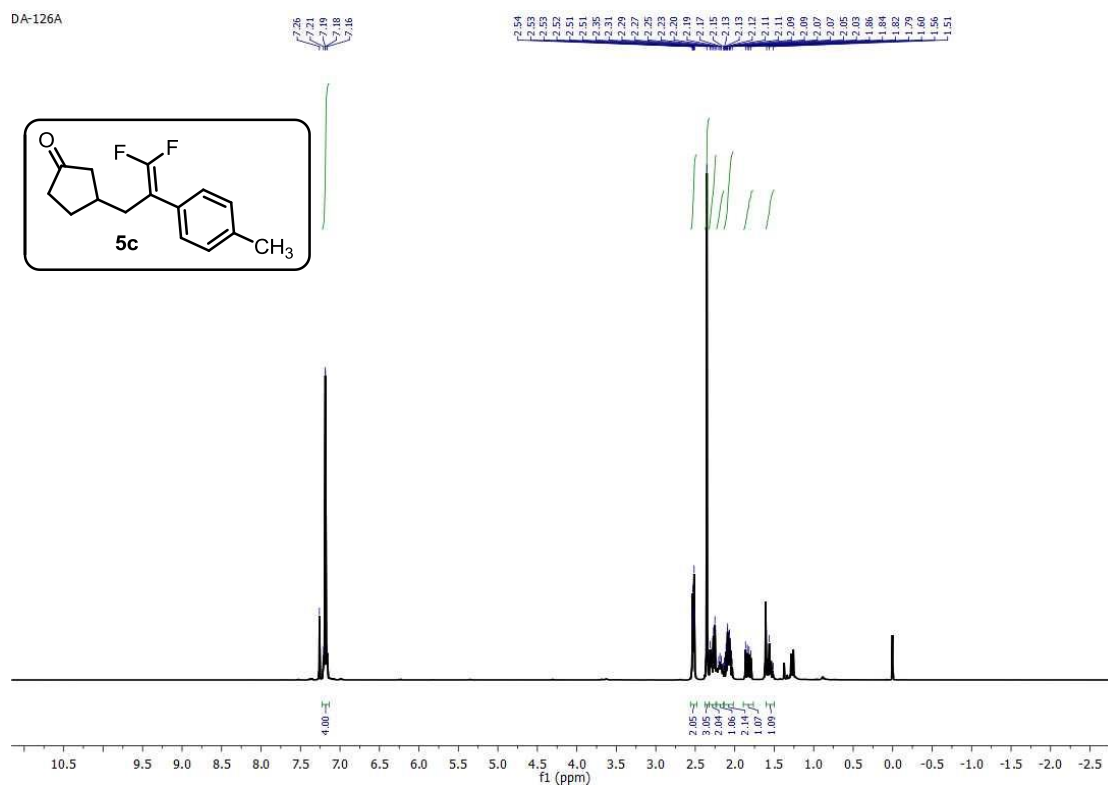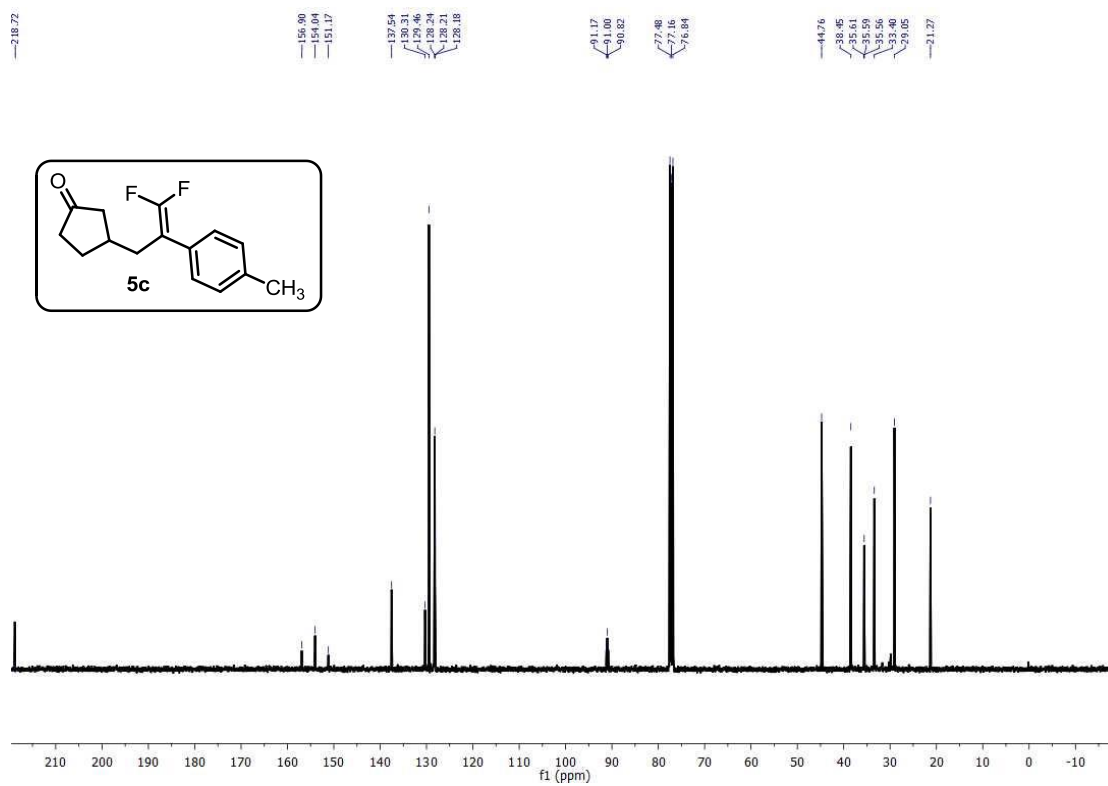

1911A0809\_DA-126A  
1911A0809\_DA-126A

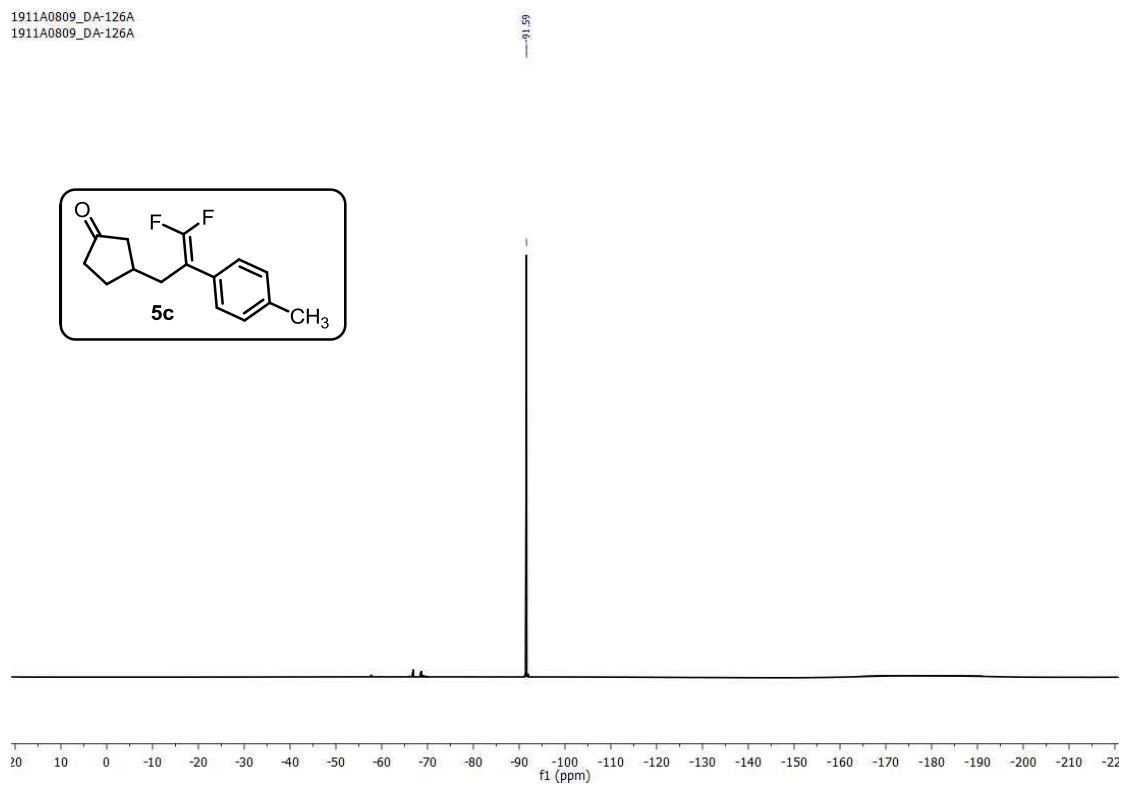

DA-130

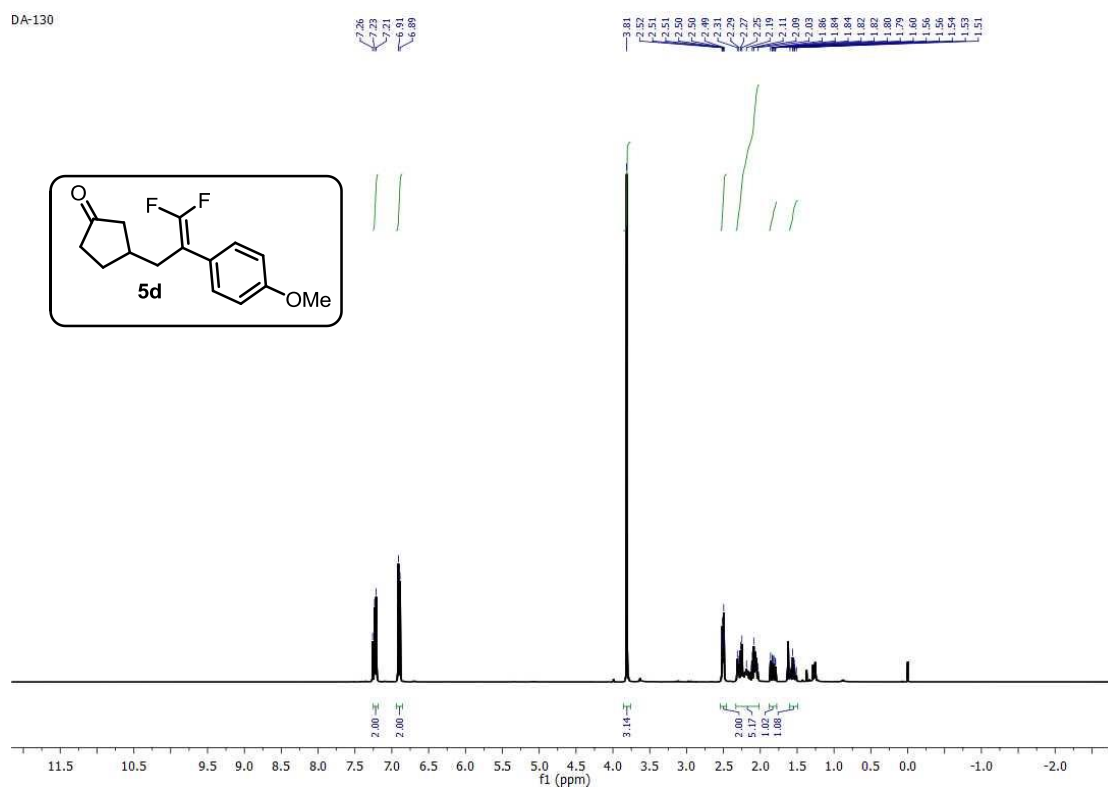

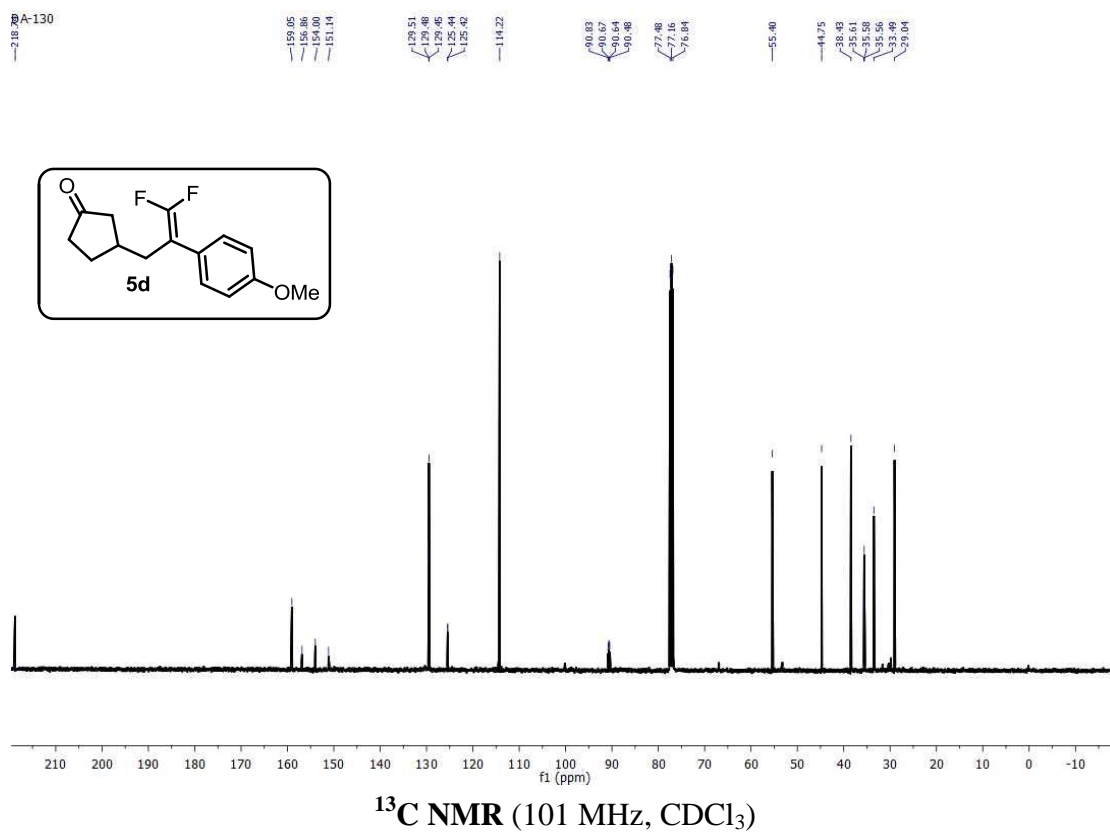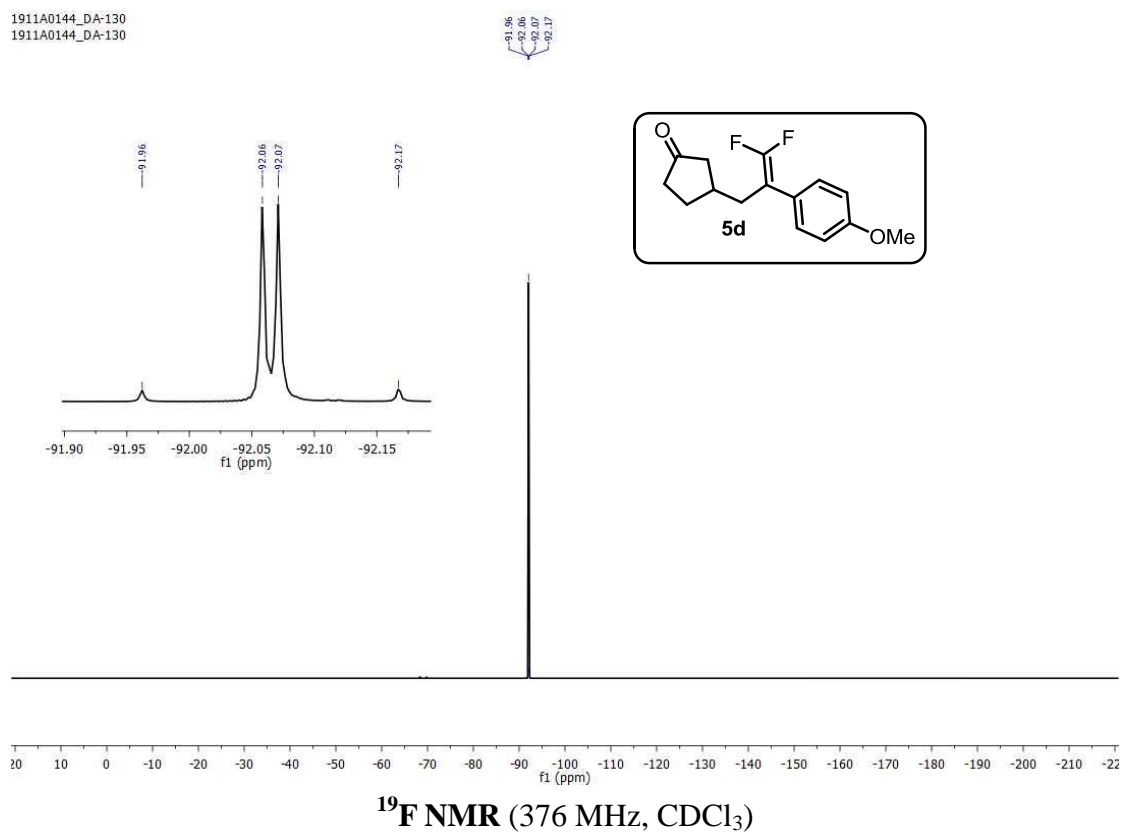

DA-127

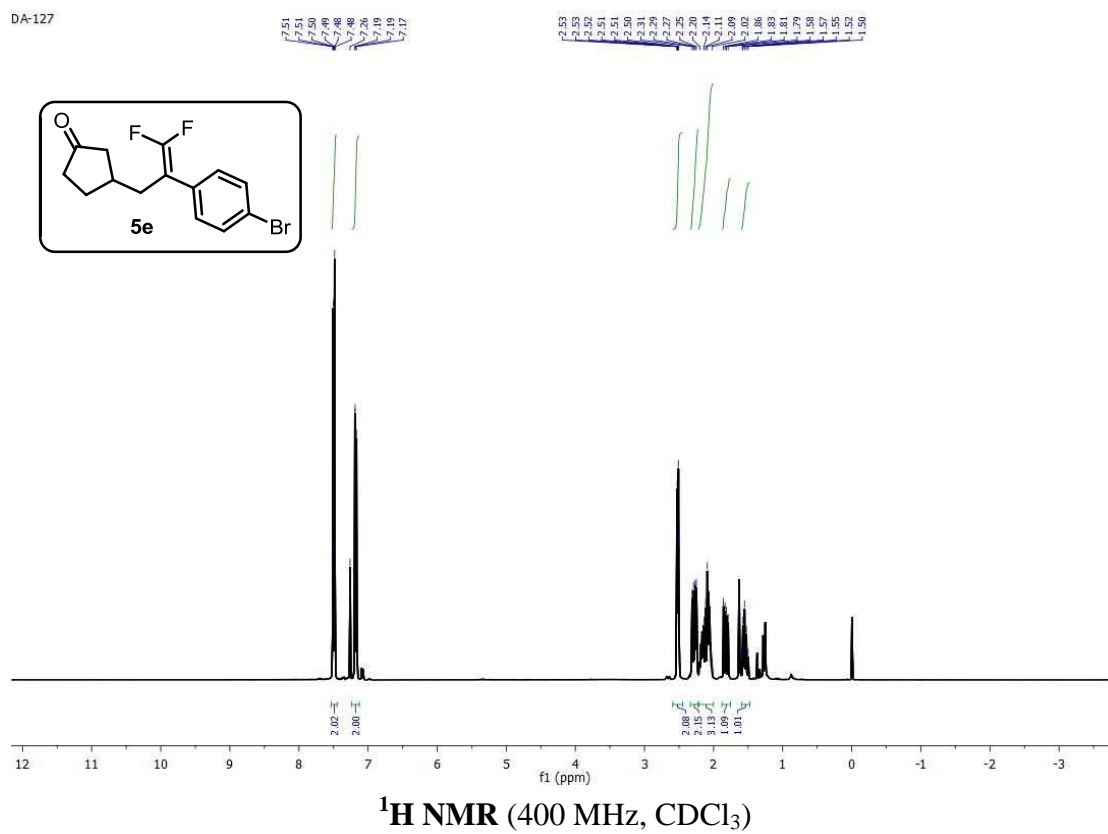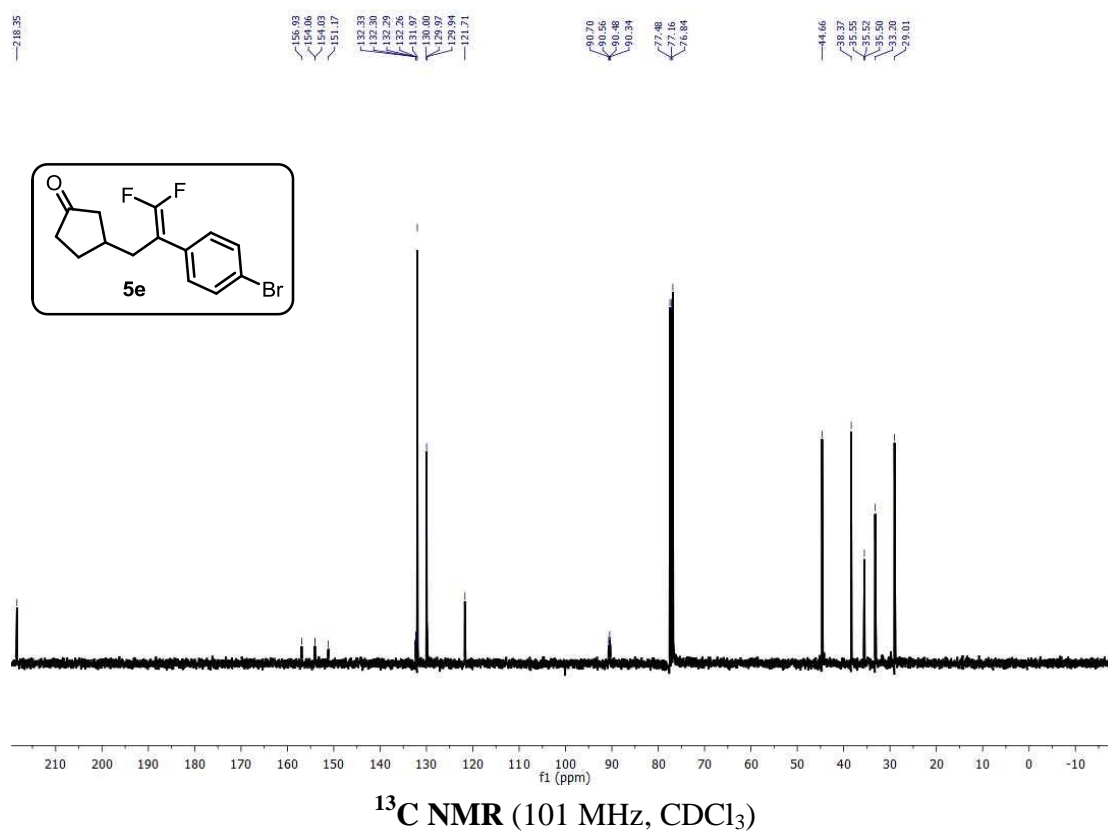

1911A0809\_DA-127  
1911A0809\_DA-127

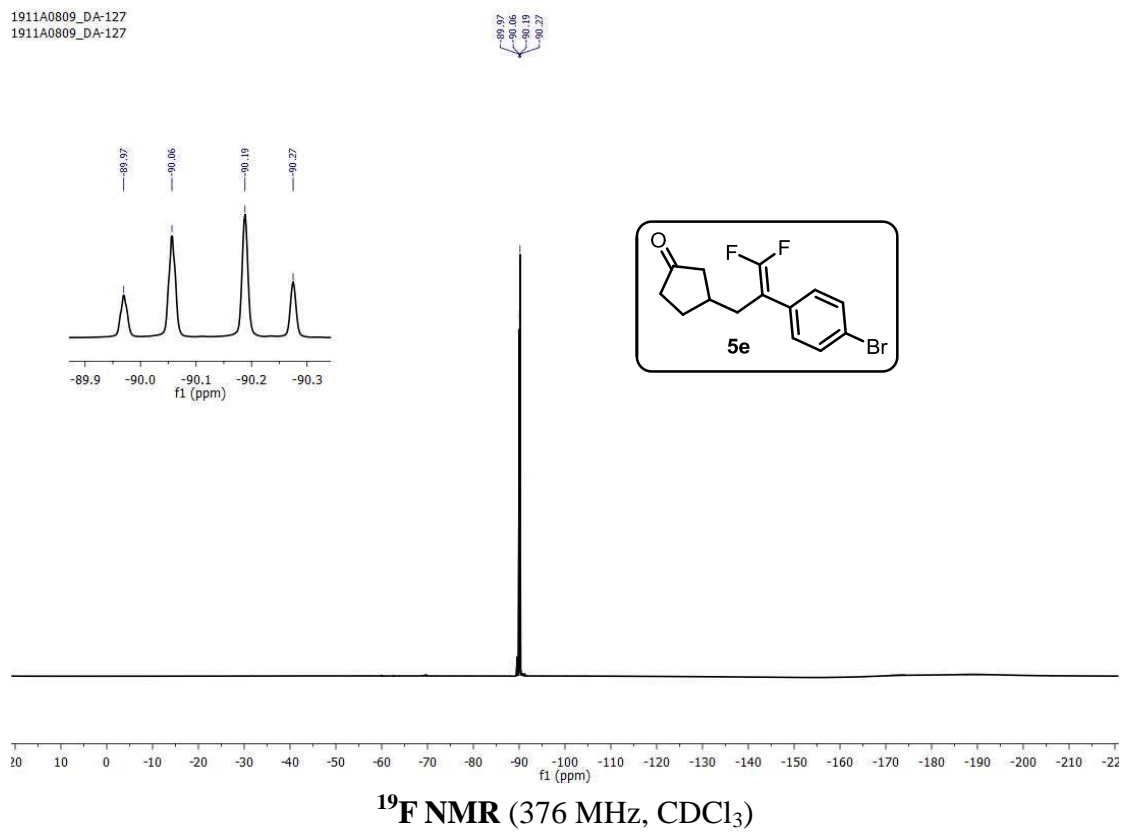

DA-138

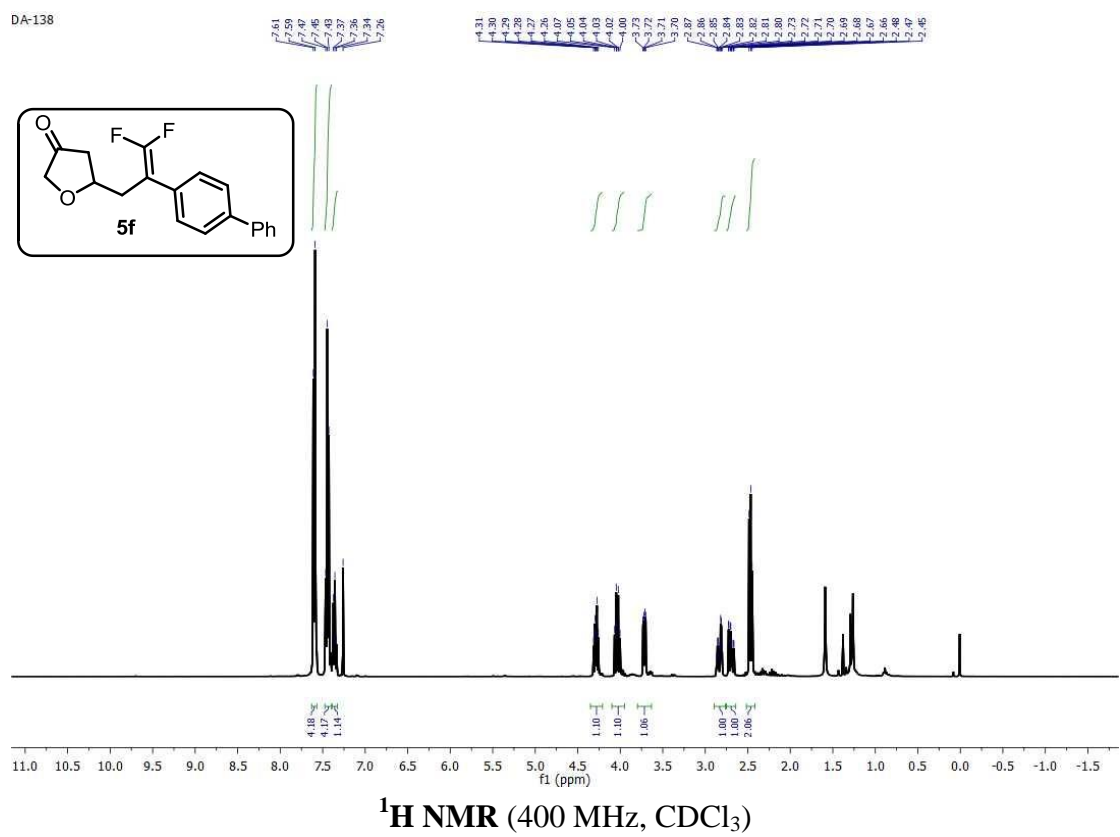

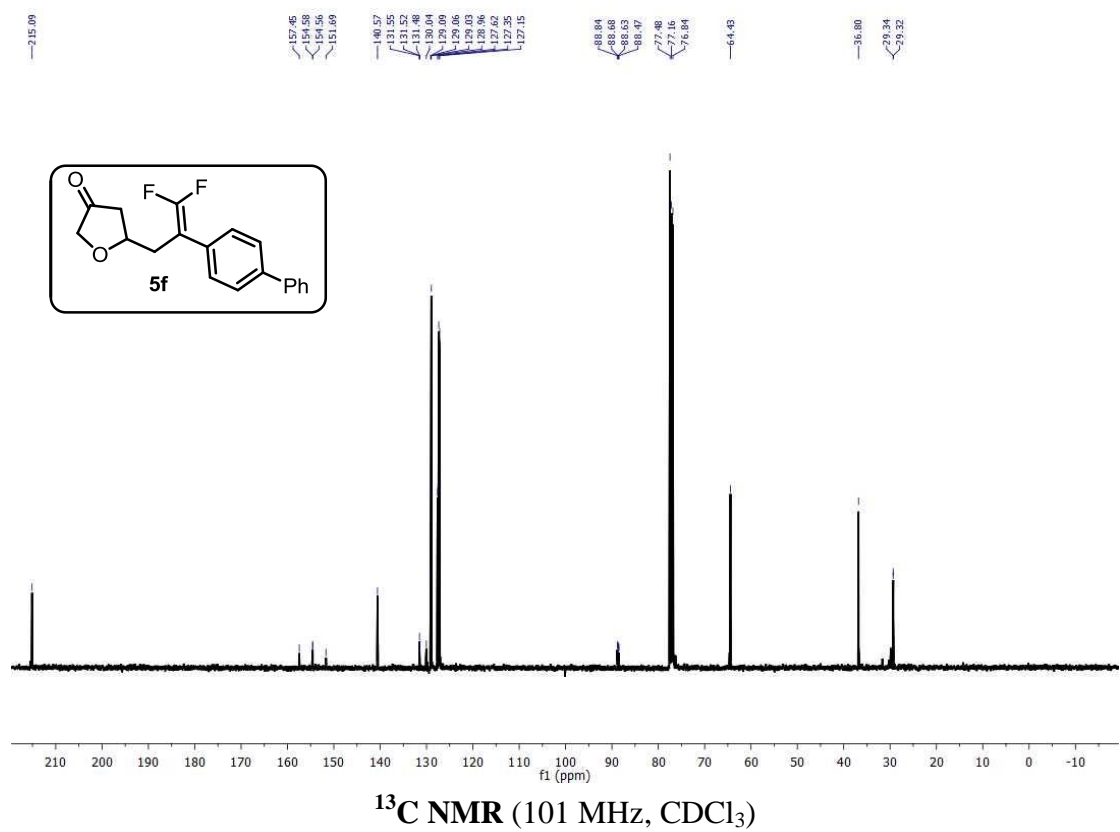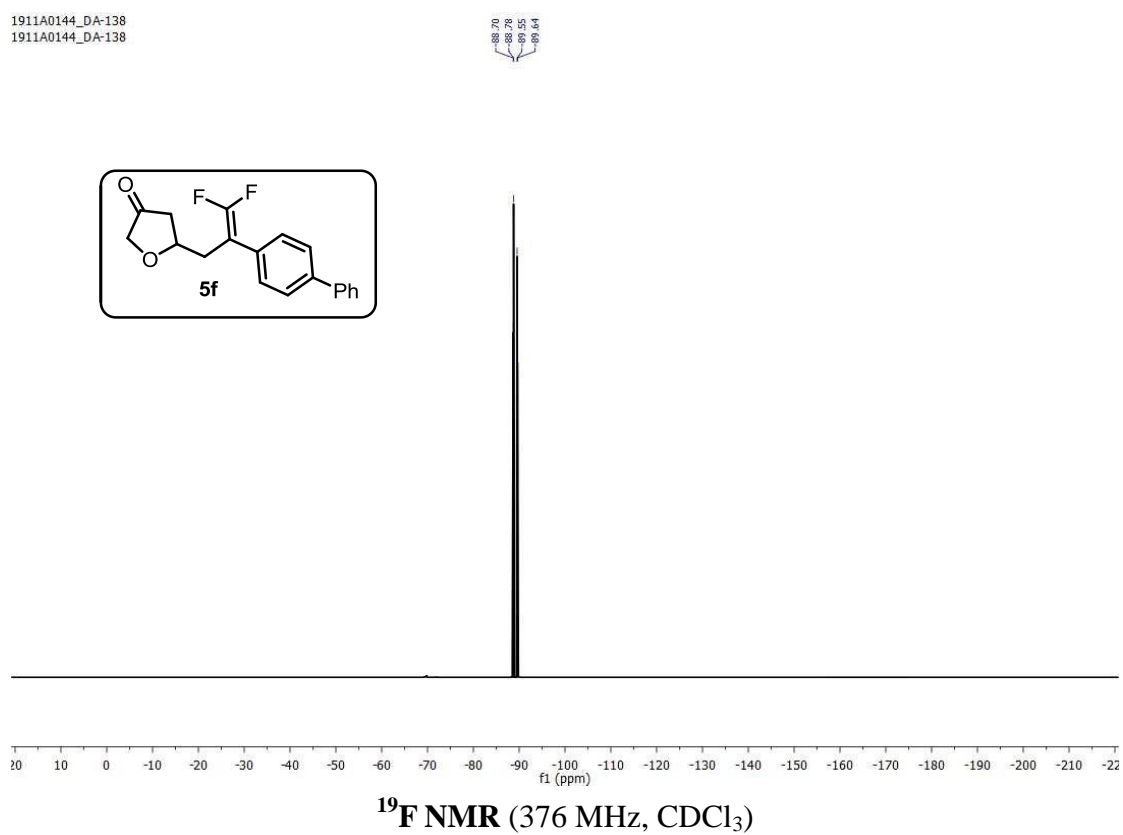

DA-15

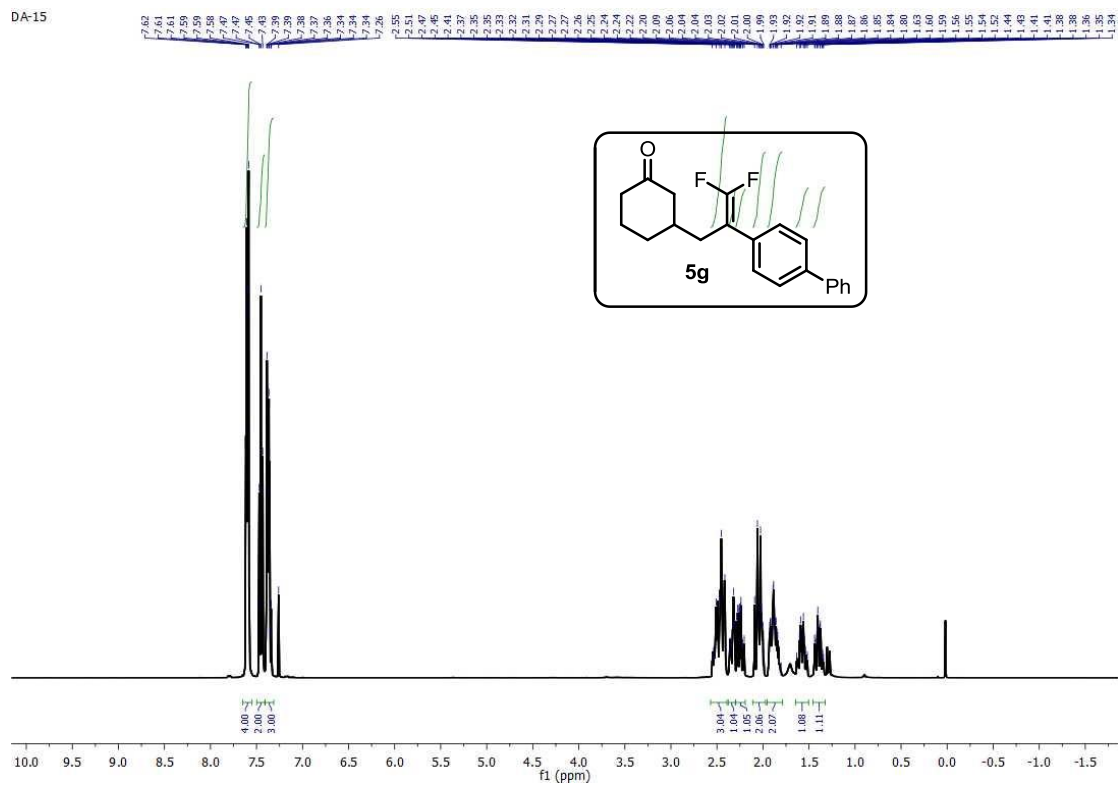

DA-15

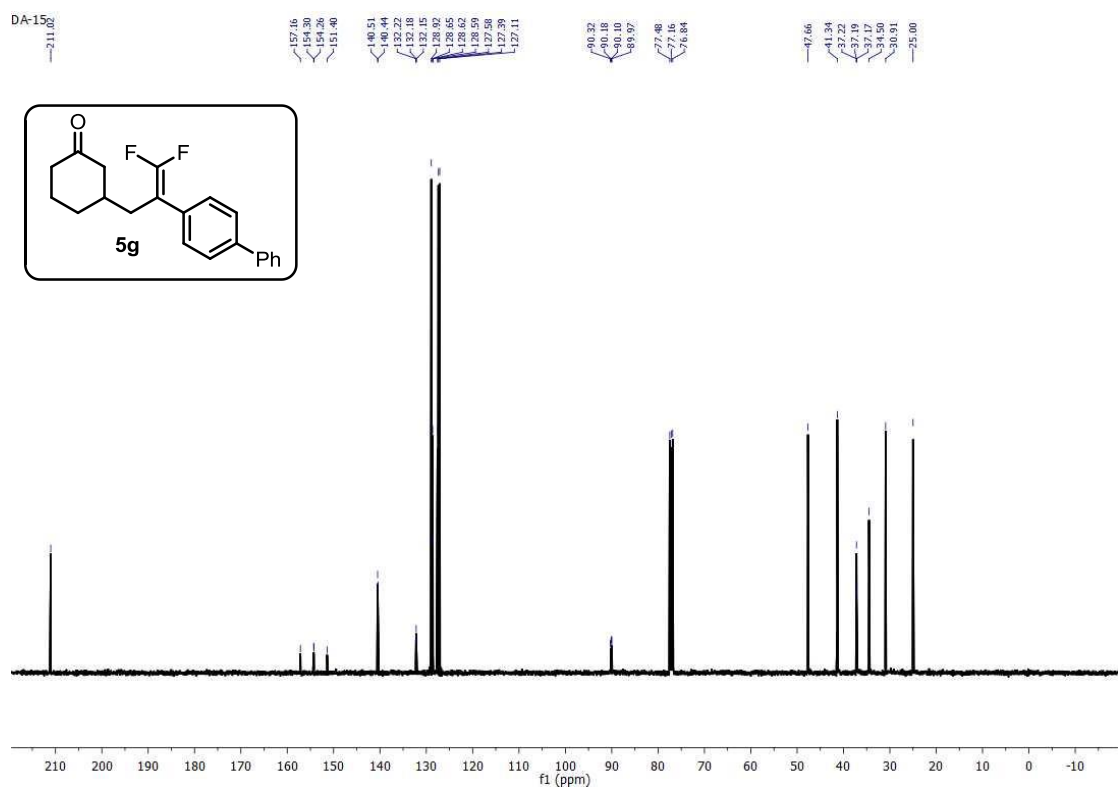





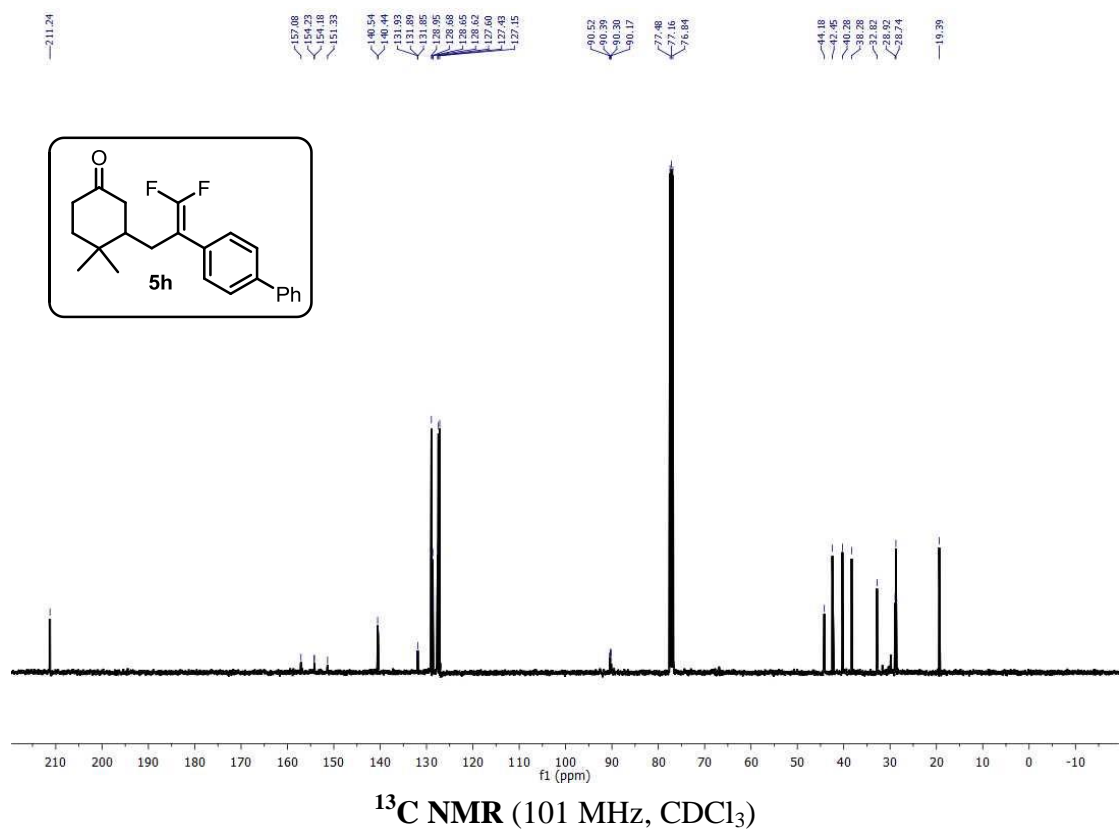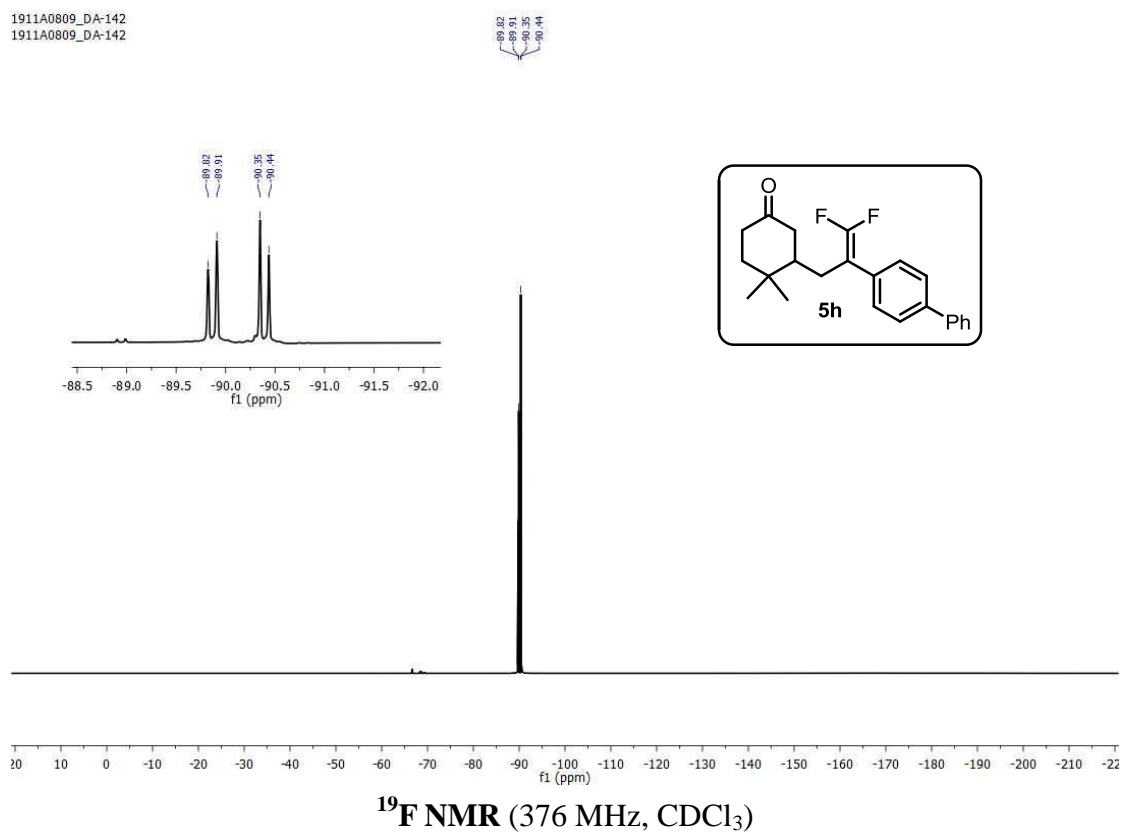

DA-141

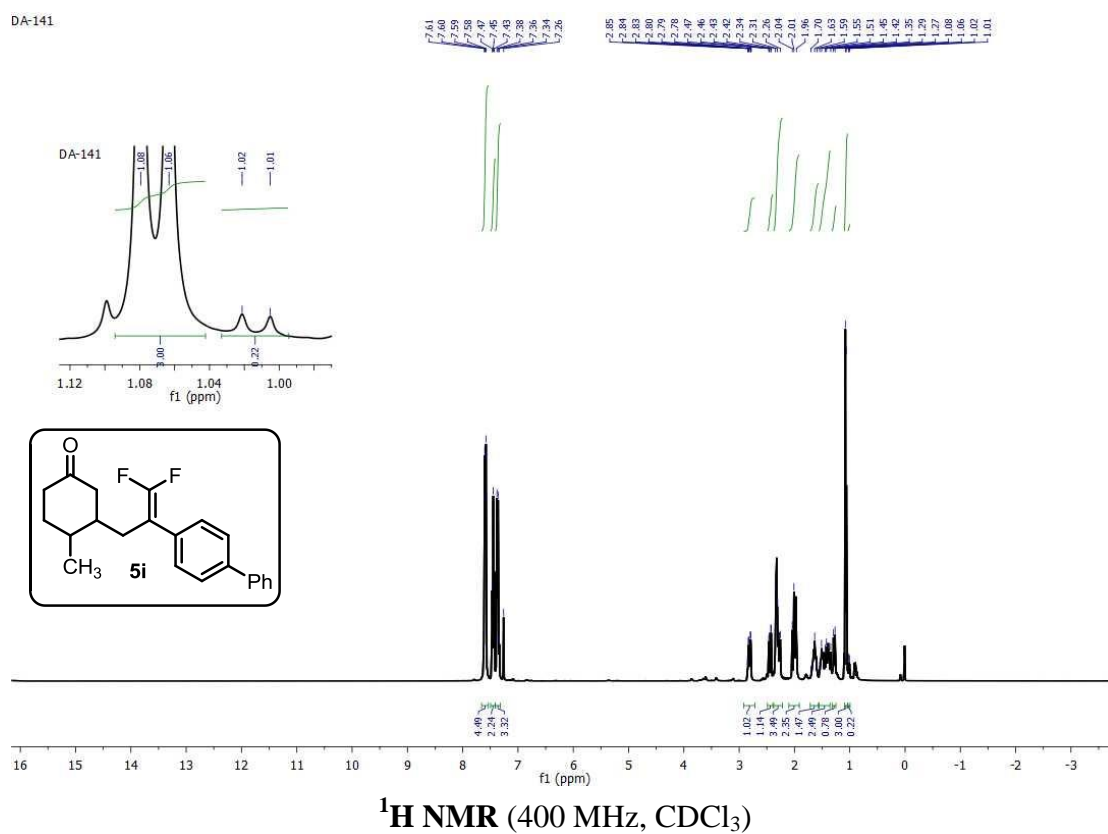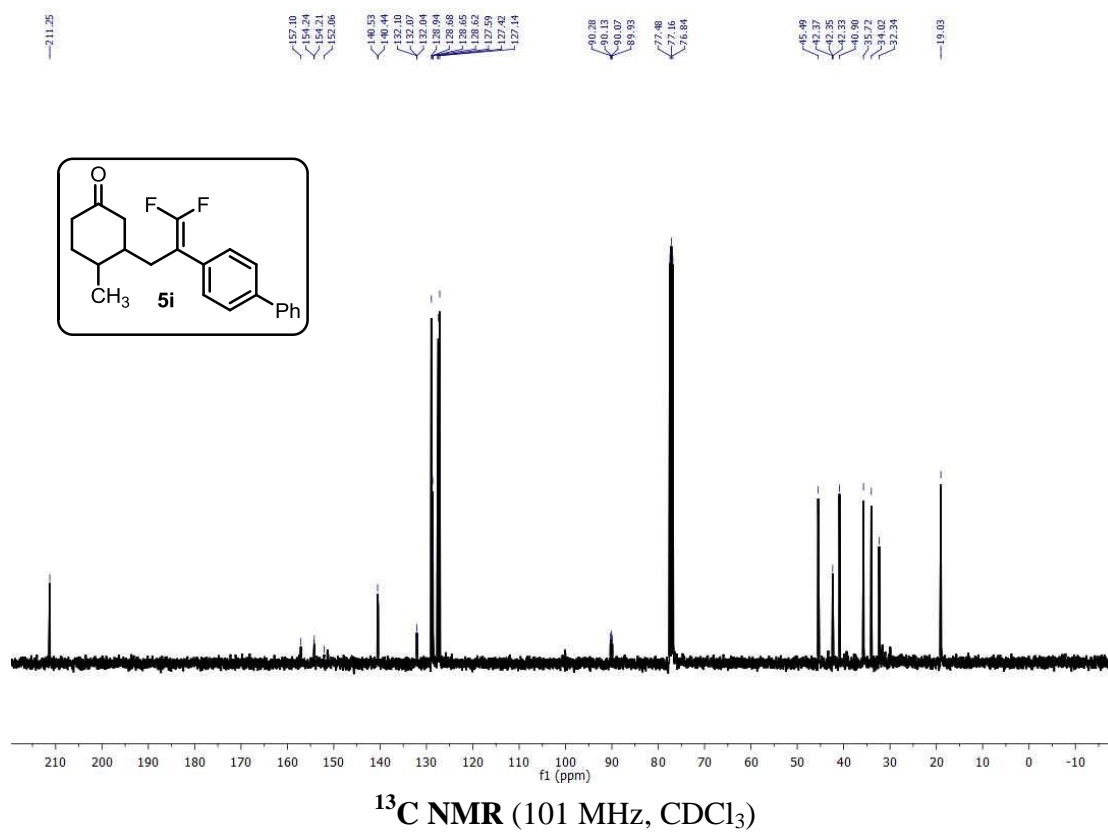

DA-141

F19CPD CDCl<sub>3</sub> {E:\Anand} Anand 51

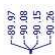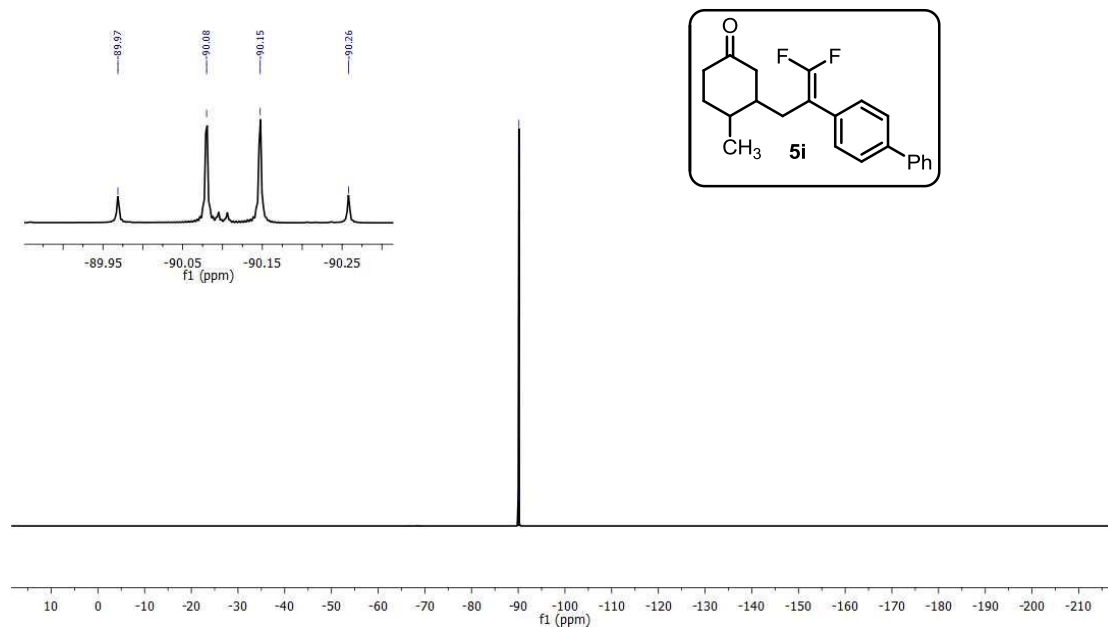

<sup>19</sup>F NMR (376 MHz, CDCl<sub>3</sub>)

DA-139A

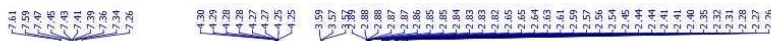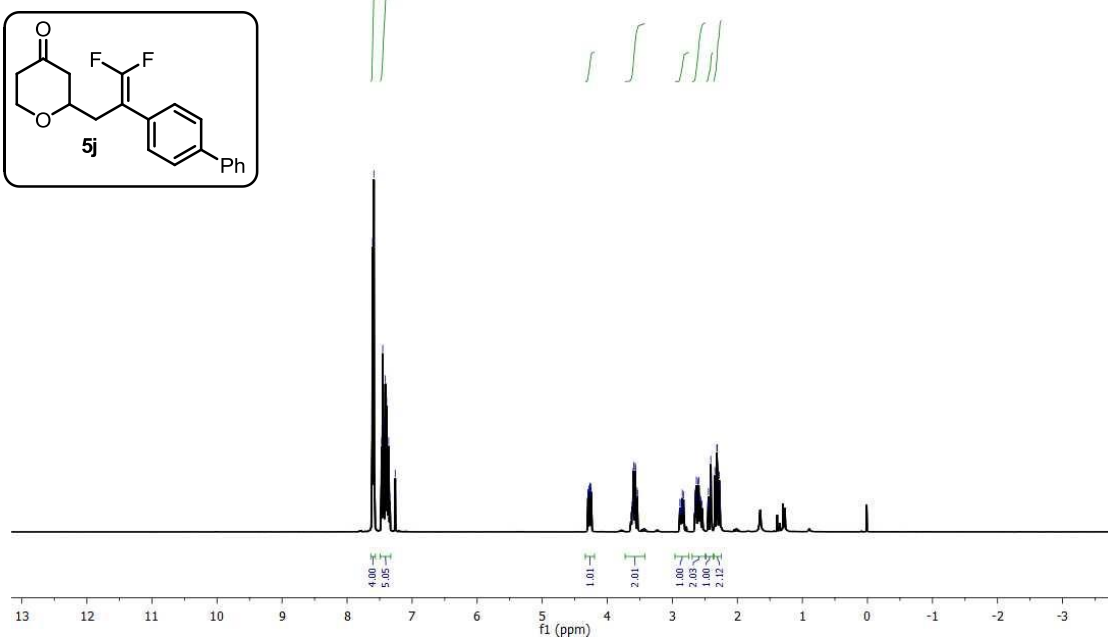

<sup>1</sup>H NMR (400 MHz, CDCl<sub>3</sub>)

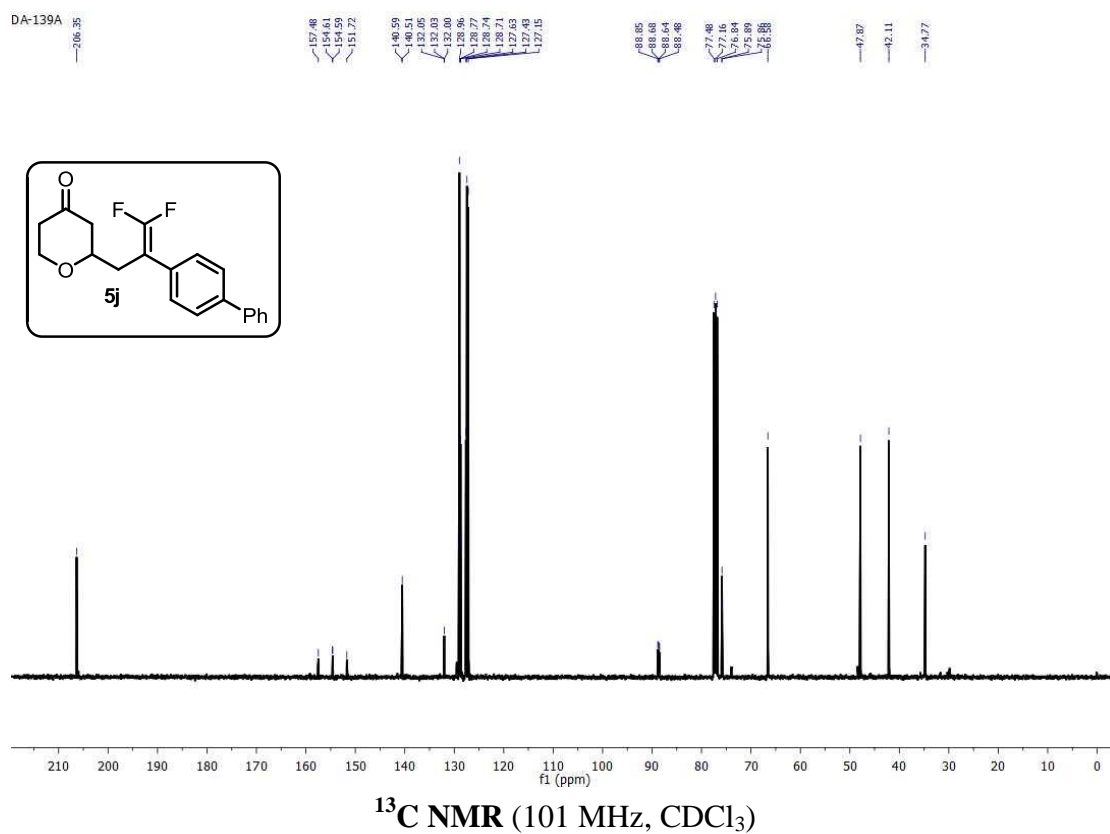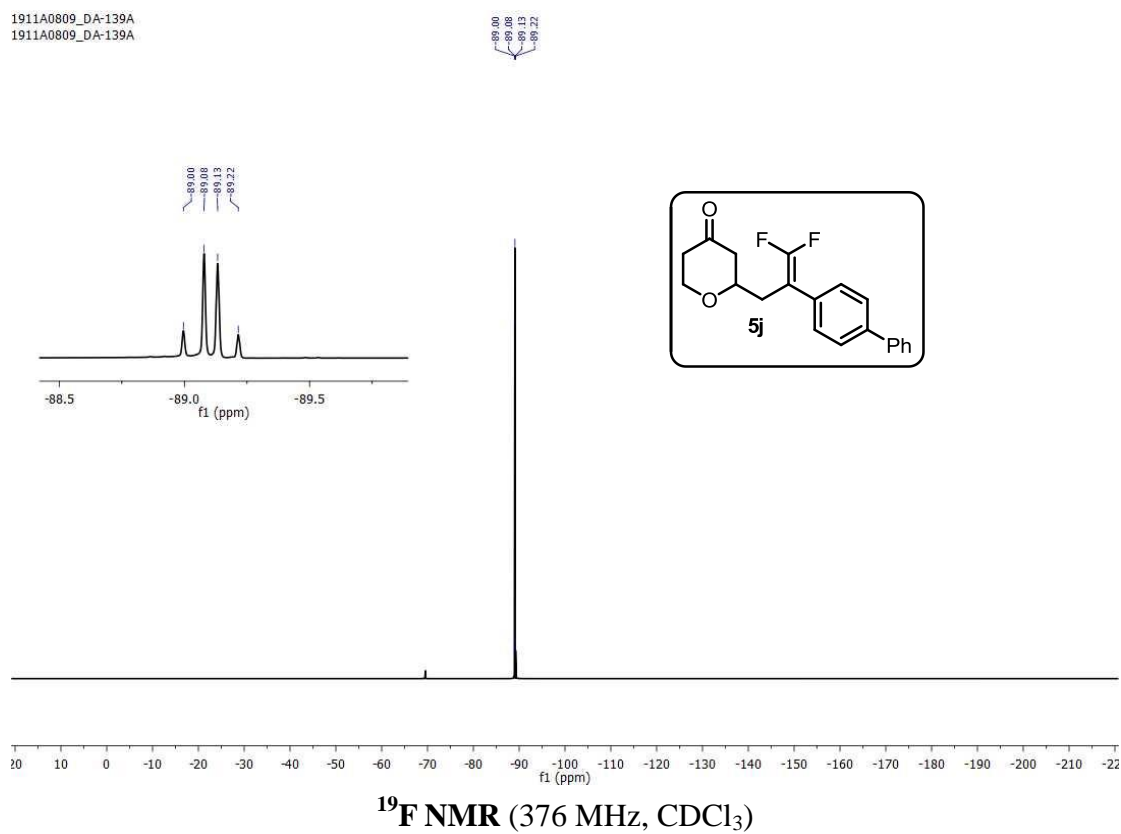

DA-102

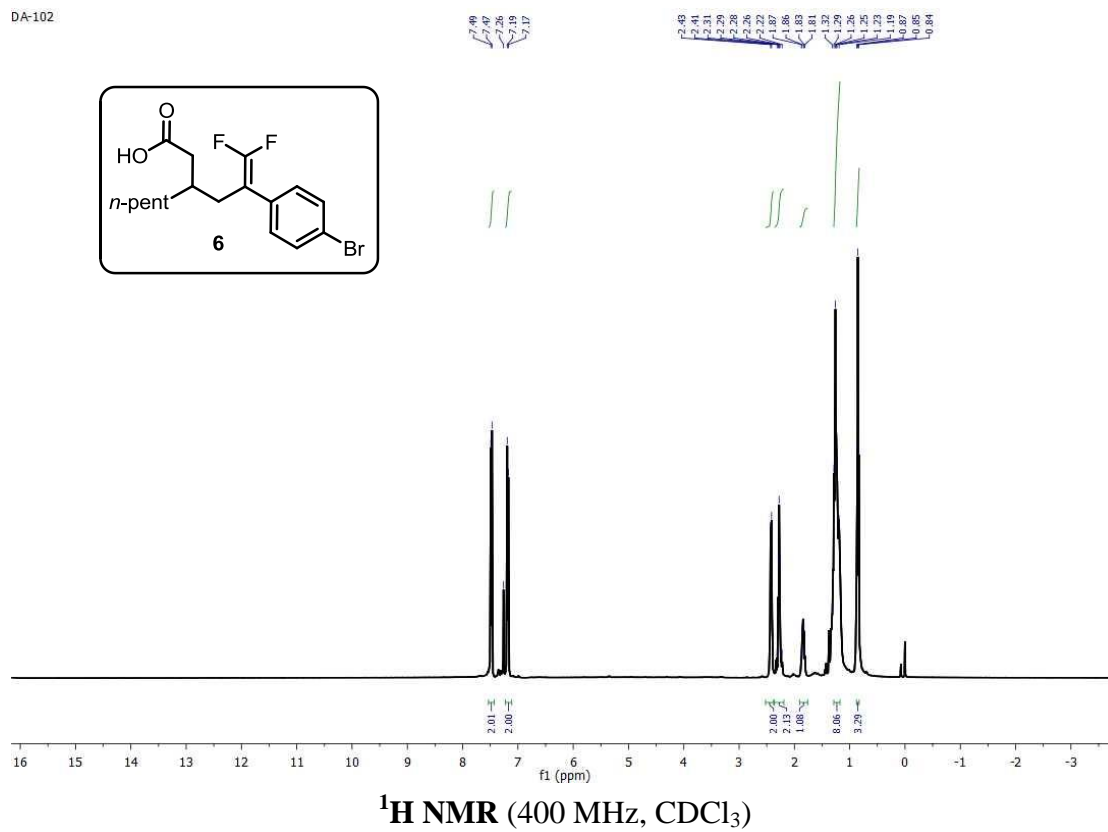

DA-102

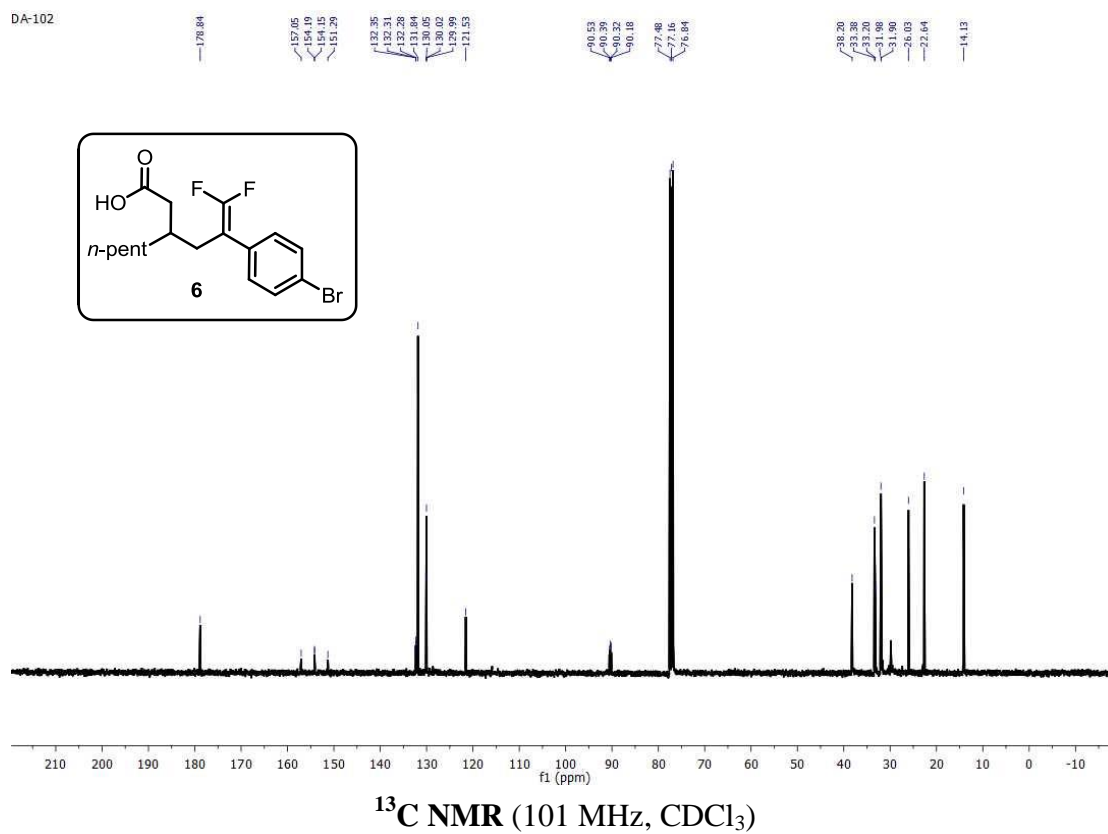

DA-102

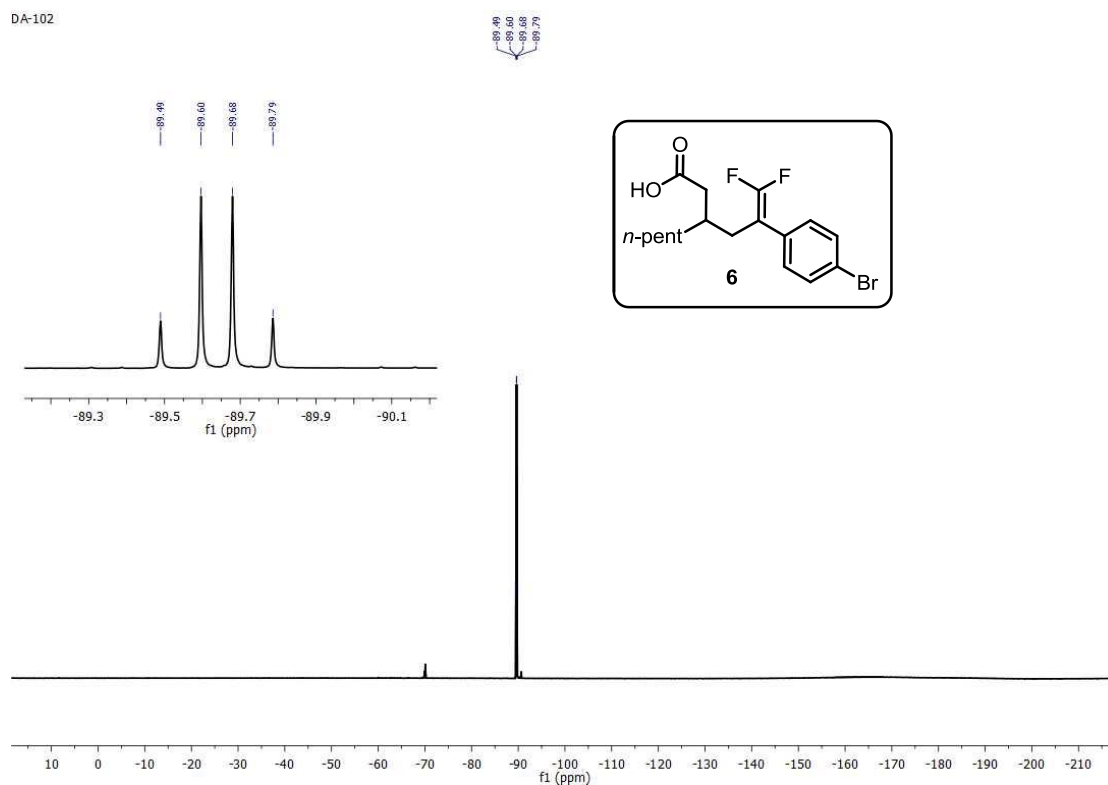

DA-103A

PROTON  $\text{CDCl}_3$  {E:\data2\Anand} Anand 59

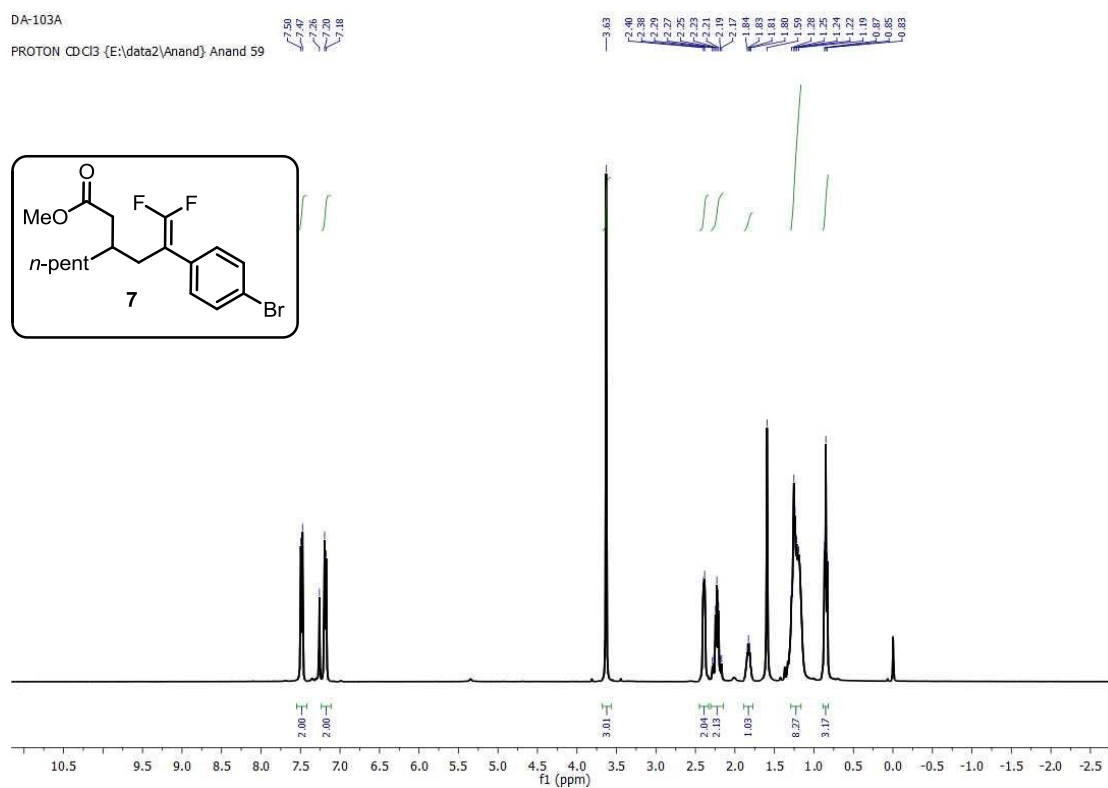

DA-103A

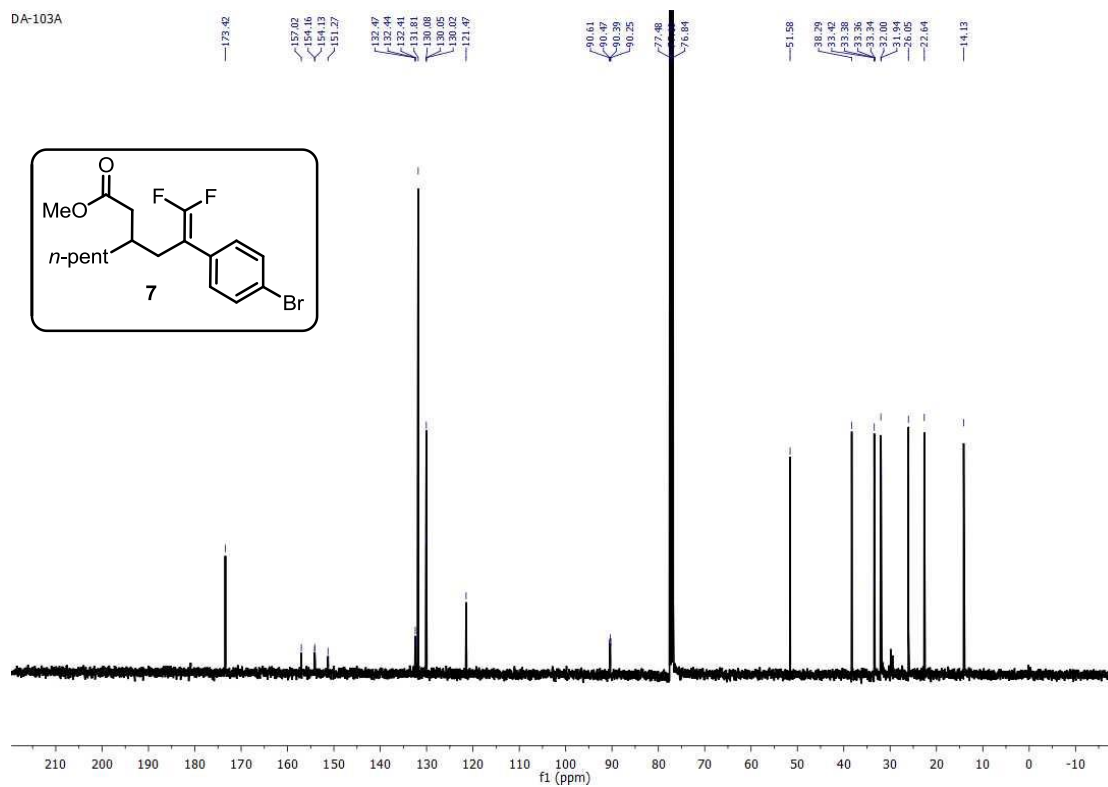

DA-103A

F19CPD CDCl<sub>3</sub> (E:\data2\Anand) Anand 59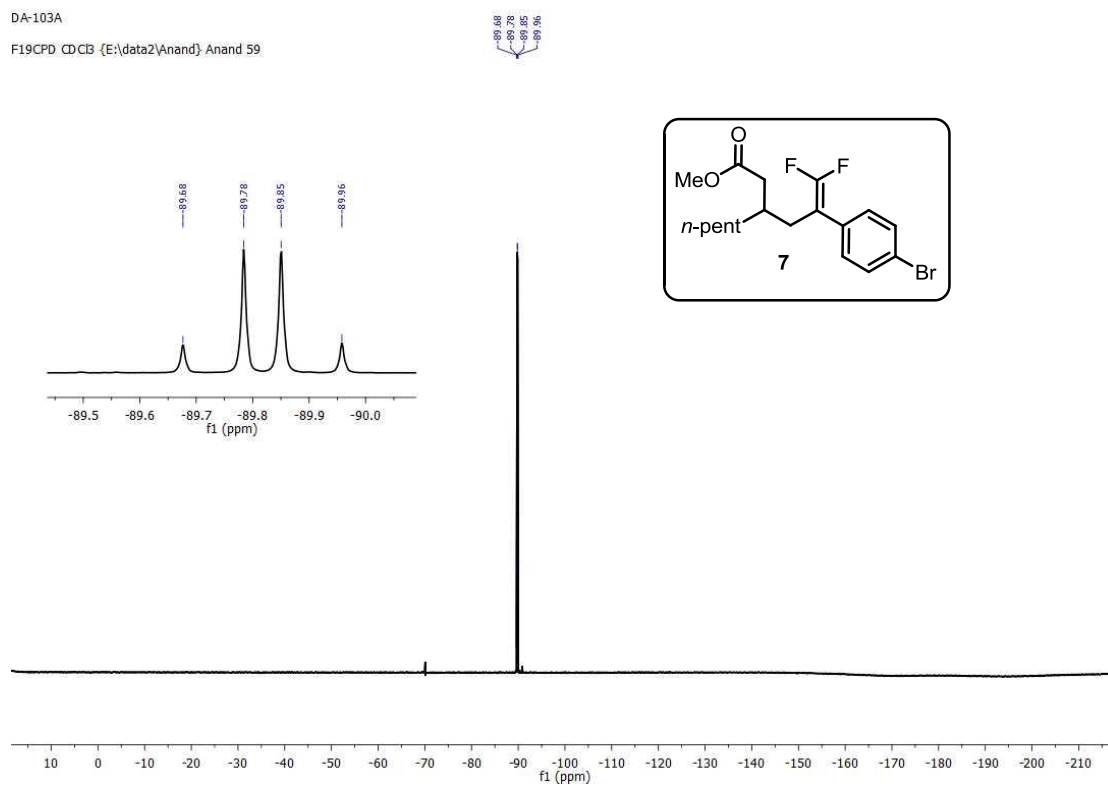

DA-1458

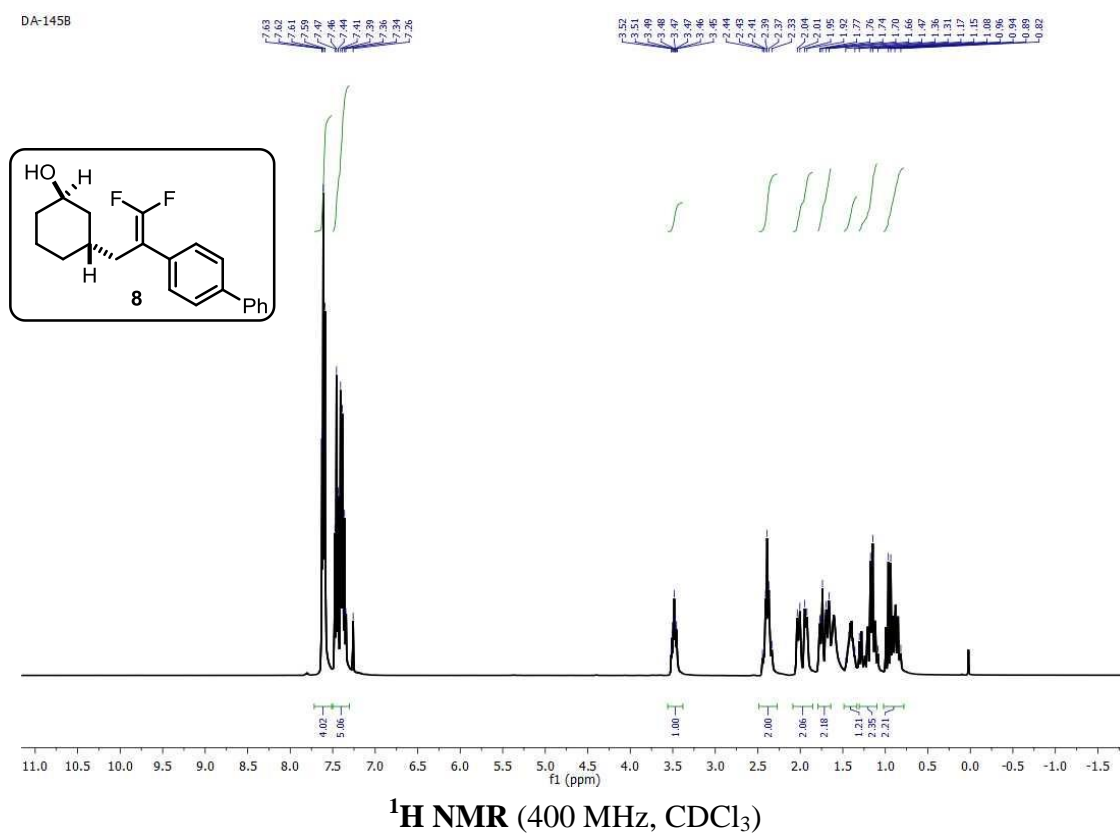

DA-1458

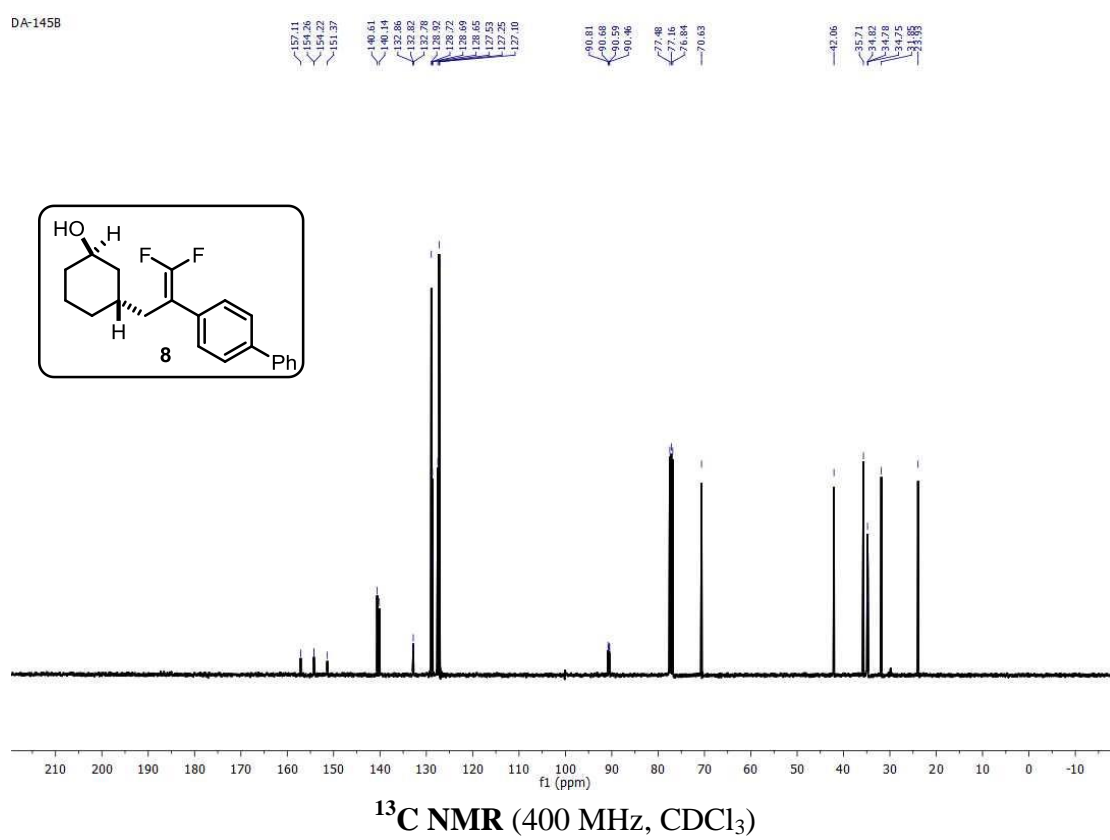



1911A0809\_DA-1458  
1911A0809\_DA-1458

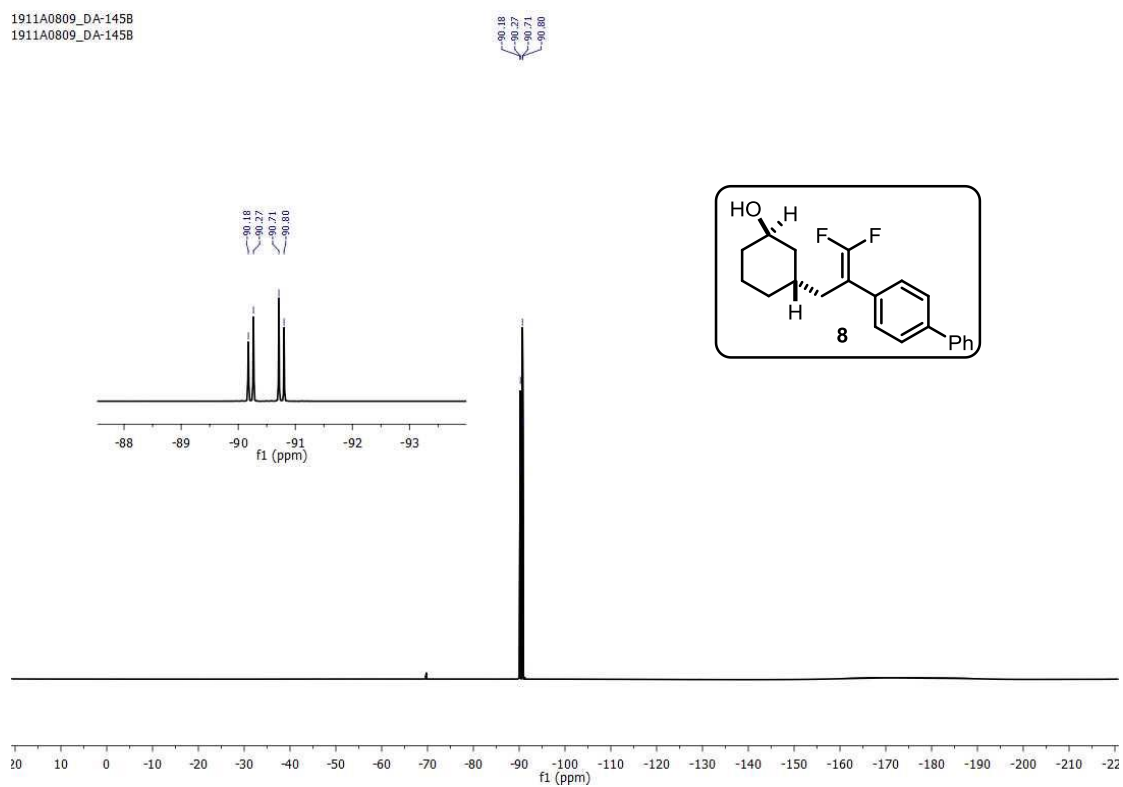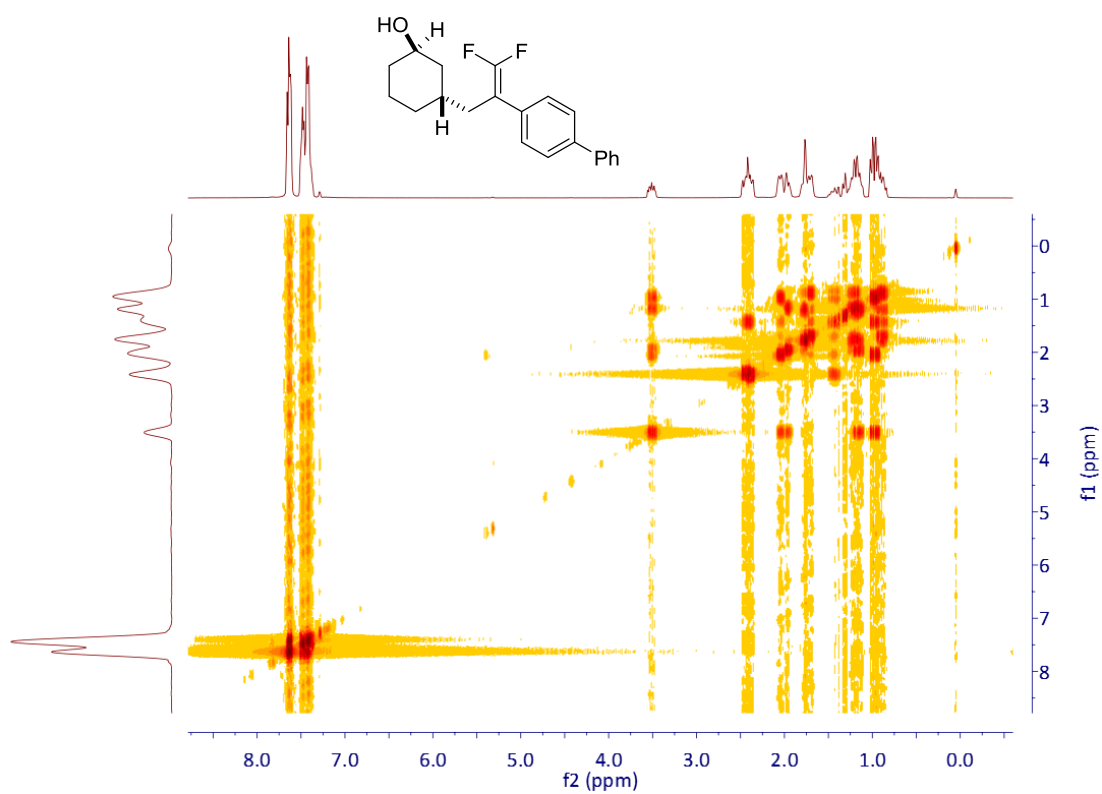

DA-145A

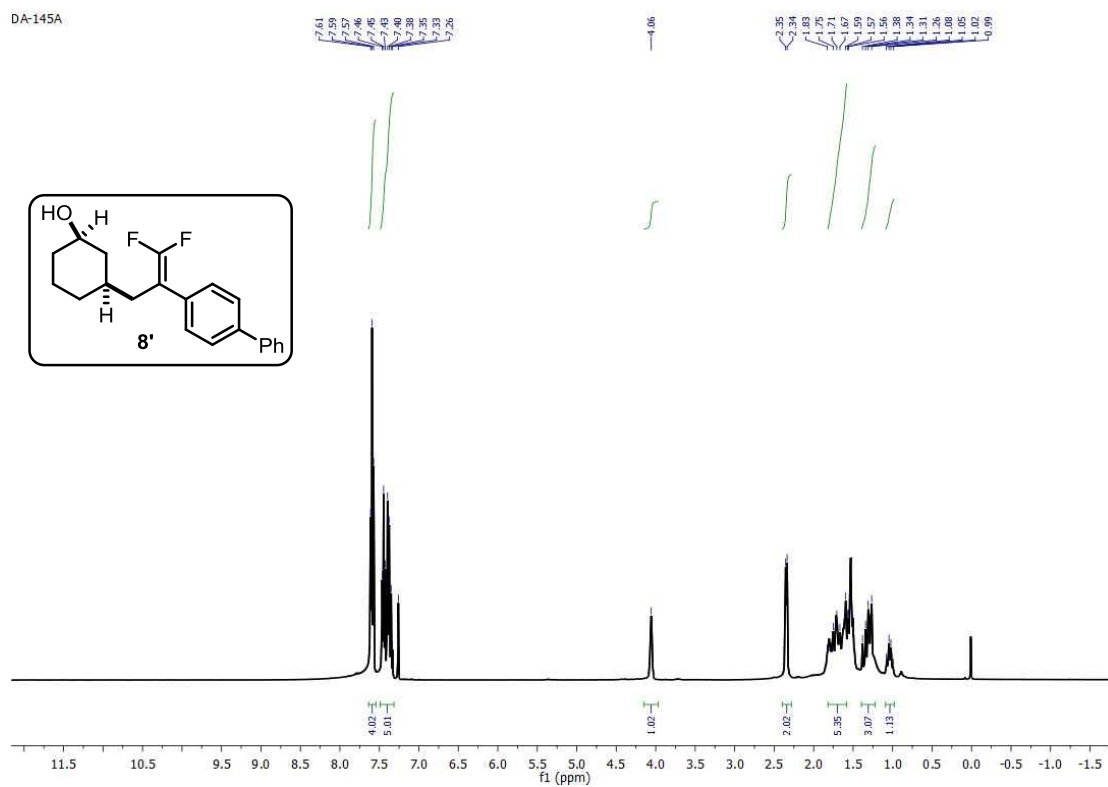**<sup>1</sup>H NMR (400 MHz, CDCl<sub>3</sub>)**

DA-145A

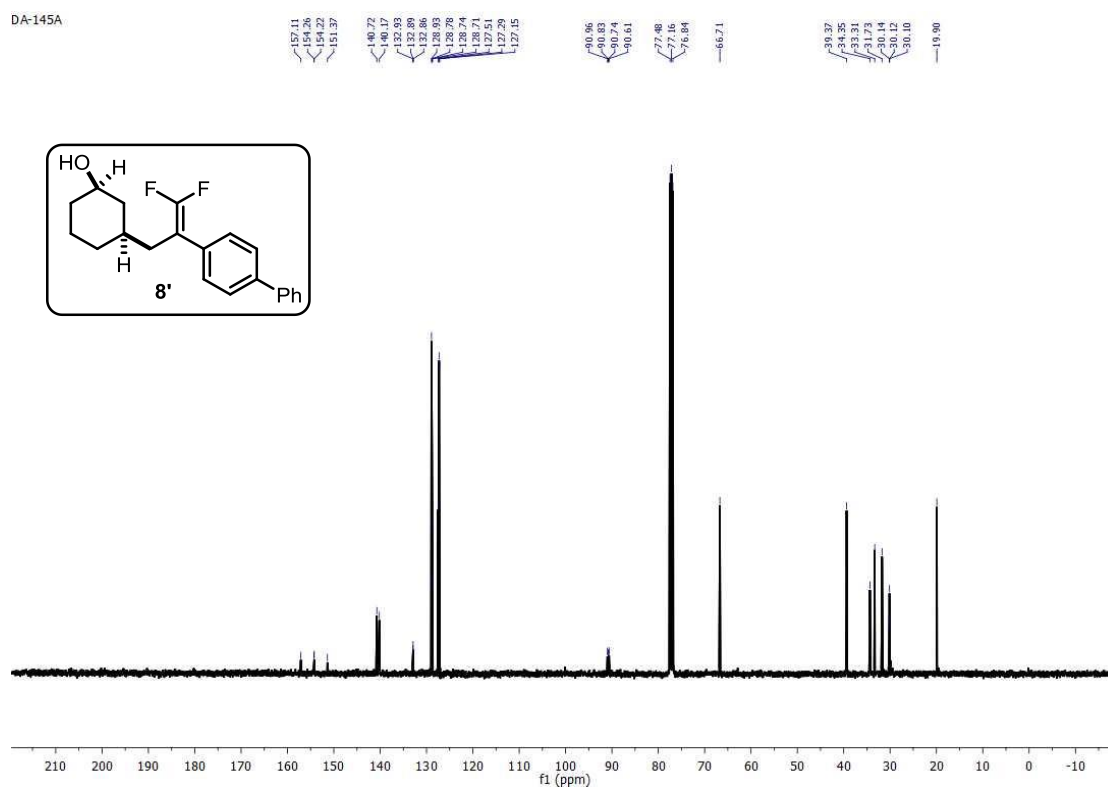**<sup>13</sup>C NMR (400 MHz, CDCl<sub>3</sub>)**

1911A0809\_DA-145A  
1911A0809\_DA-145A

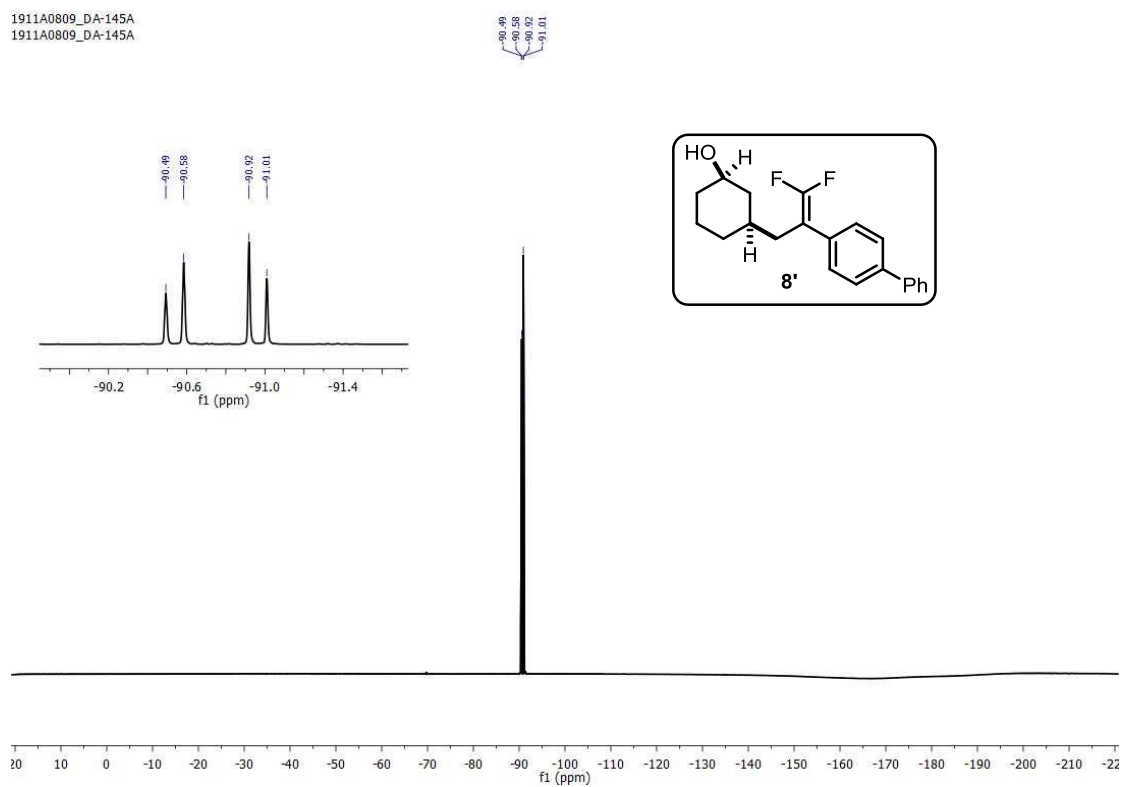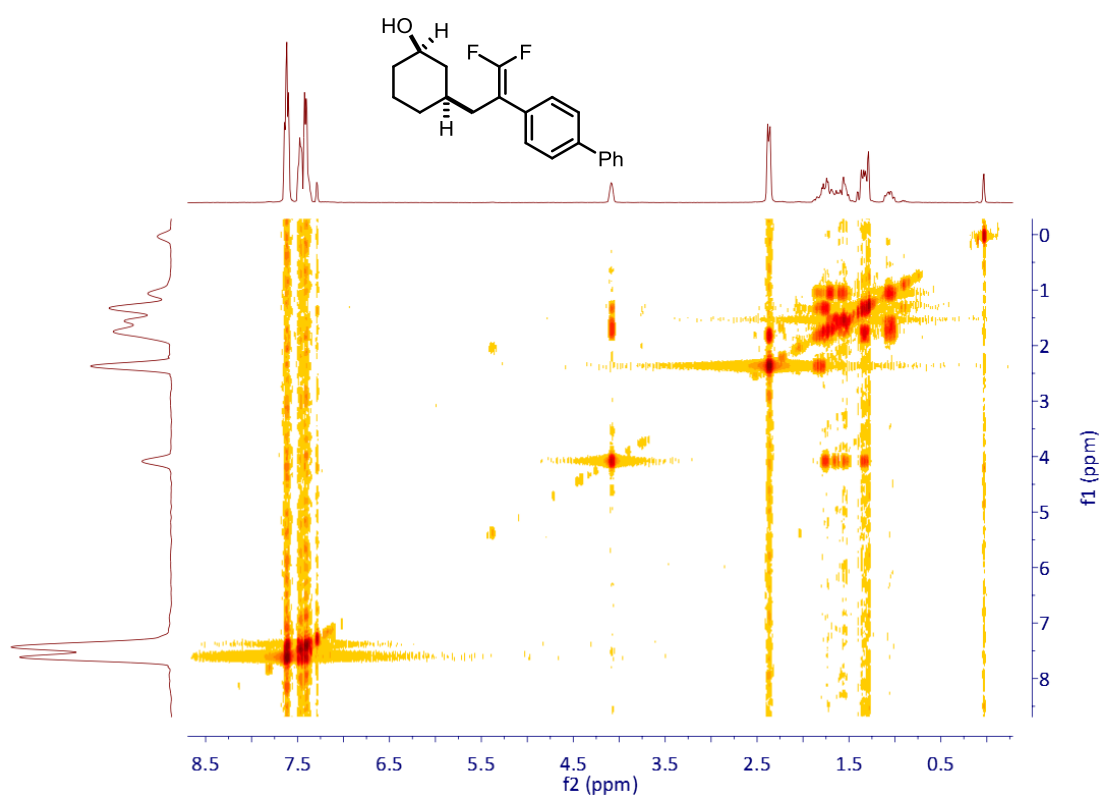

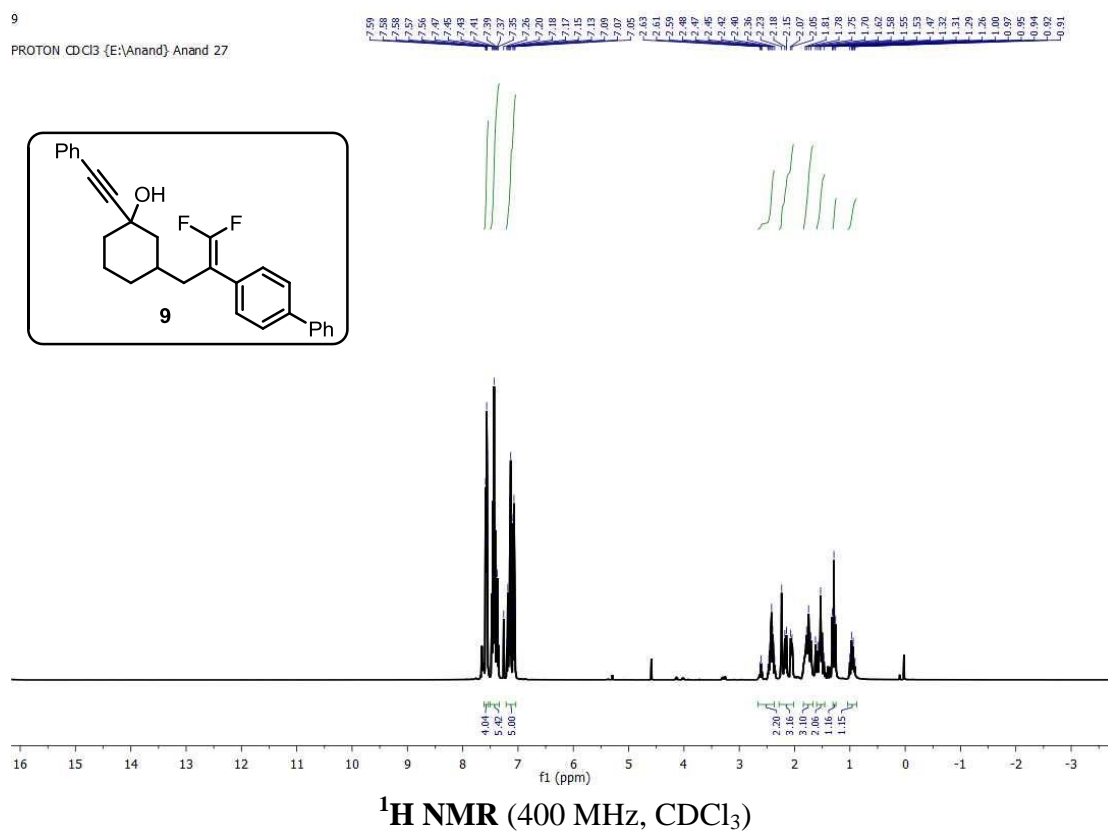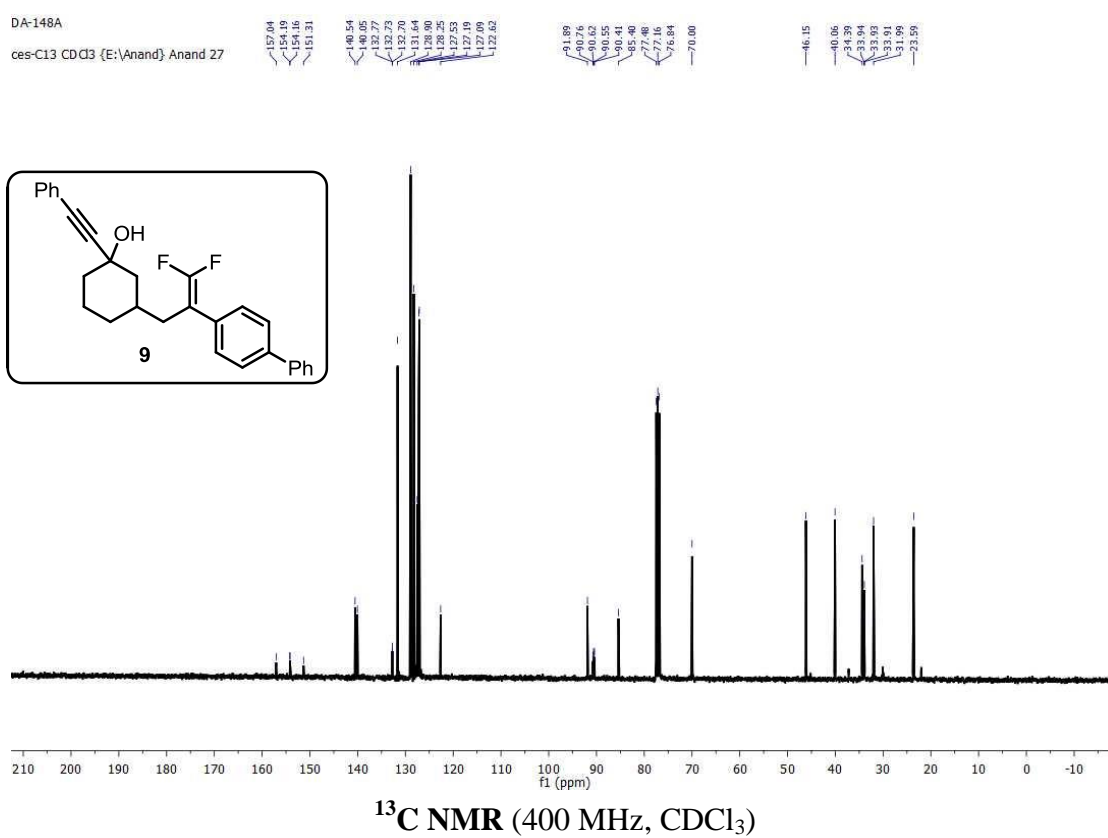

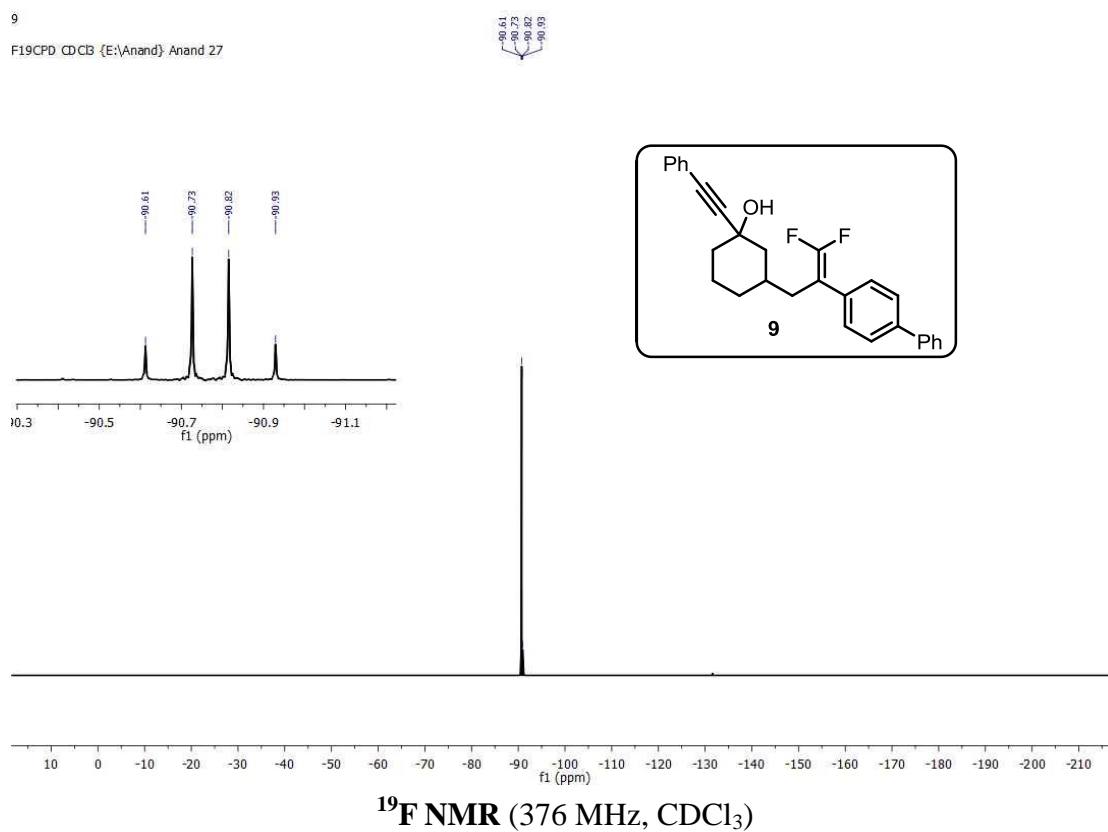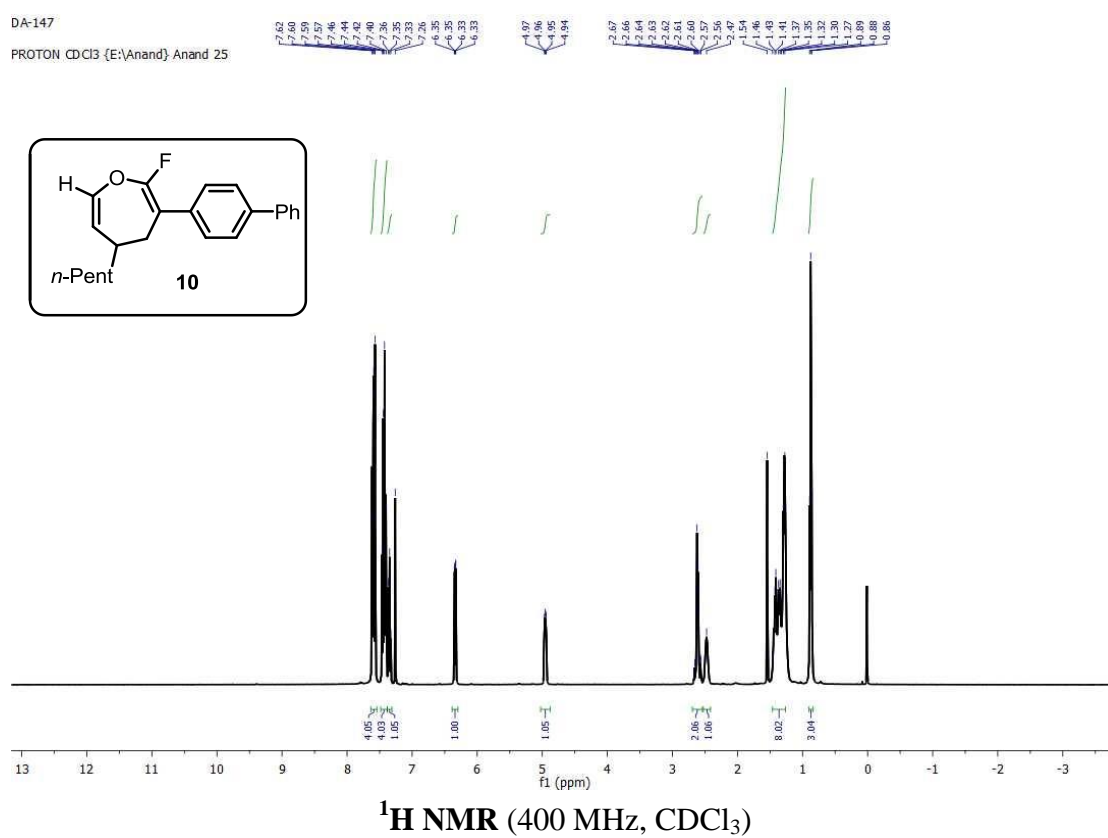

DA-147

ces-C13 CDCl3 {E:\Anand} Anand 5

157.24 154.57 140.93 139.66 138.43 136.65 136.61 128.91 128.32 127.14 117.97 116.21 96.78 96.52 77.48 77.16 76.84 36.69 36.31 36.29 33.47 33.45 32.03 26.64 22.69 -14.17

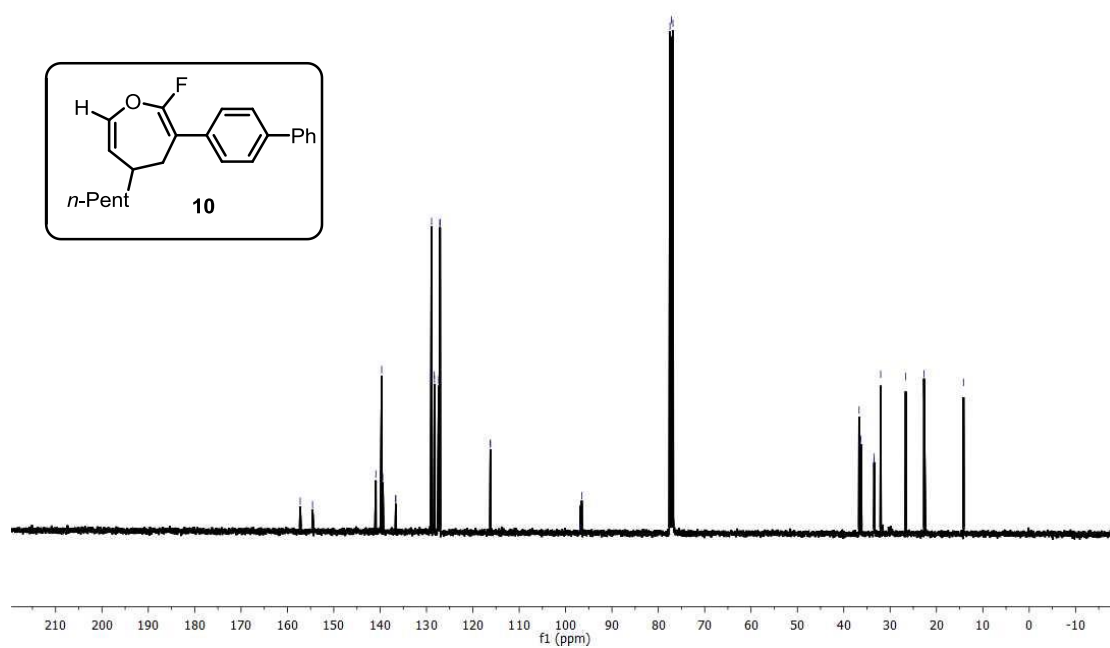

DA-147

F19CPD CDCl3 {E:\Anand} Anand 25

-82.17

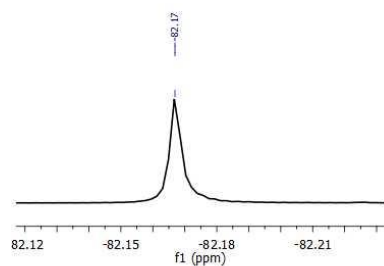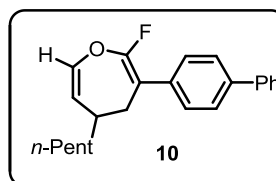

<sup>19</sup>F NMR (376 MHz, CDCl<sub>3</sub>)
